# Supplementary material for: Mixed Script Identification Using Automated DNN Hyperparameter Optimization
Source: Hindawi journal article supplement (doi:10.1155/2021/8415333), 2021-01-01
Supplement: f1 [file 8415333.f1.zip]

چہل

جھلڑ

جھل

جھٹڑ

جَہت

تھپڑ

تھپ

پنڈڑ

پنڈ

پگڑ

پگ

بوٹھڑ

بوٹھ

بھلڑ

بھلہ

بگڑ

بگ

لڑا

لڑی

کوکڑا

کوکڑی

رہڑا

رہڑی

دھڑا

دھڑی

دیگڑا

دیگڑی

دڙا

دڙي  
ٺهڙا

ٺهڙي

پڙهڙا

پڙهڙي

پڙا

پڙي  
پلوڙ

پلوڙي

پهپهڙ

پهپهڙي

جهڙ

جهڙي  
تهگڙ

تهگڙي

ترنگڙ

ترنگڙي

ترگڙ

ترگڙي

ٻڙ

ٻڙي

ٻهگڙ

ٻهگڙي

ٻناڙ

ٻناڙي

بٹور

بٹوری

بڈھڑ

بڈھڑی

اگاڑ

اگاڑی  
چیرا

چیرى

پکرا

پکری

چلھا

چلھی  
تڈا

تڈی

تڈا

تڈی

بڈھا

بڈھی  
بانھا

بانھی

مولھا

مولھی

کھاڑا

کھاڑی  
کٹورا

کٹوری

ٹوڈا

ٹوڈی

ٹوکرا

ٹوکری  
کنال

کنالی

طاق

طاقی

ڈھینگر

ڈھینگری  
راگ

راگنی

چھپر

چھپری

ٹوپ

ٹوپى  
ٹپر

ٹبرى

تھگڑ

تھگڑى

پھاڑ

پھاڑى

ڈول

ڈولى

تھال

تھالى

بوٹ

بوٹی  
ودھیرا/ودھیری

وَدھ

مُتیرا/مُتیری

موٹا

مَٹھیرا/مَٹھیری

مَٹھا  
لویرا/لویری

لوا

لُتیرا/لُتیری

لُٹو

دَڈیرا/دَڈیری

دَڈا  
چھٹیرا/چھٹیری

چھوٹا

جھکیرا/جھکیری

جھکا

پکیرا/پکیری

پَکا  
ٹھلیرا/ٹھلیری

ٹھلا

تھلیرا/تھلیری

تھولا

تکھیرا/تکھیری

تَکھا

پھکیرا/پھکیری

پھکا

بھلیرا/بھلیری

بَہلا

اُکھیرا/اکھیری

اوکھا  
منگری

منگر

کٹوری

کٹورا

لوٹی

لوٹا  
کوٹھی

کوٹھا

ٹولی

ٹولا

سوٹی

سوٹا  
چھپی

چھپا

چولی

چولا

پیالی

بیالہ  
بٹھی

بٹھہ

ٹیپی

ٹپہ

ٹپی

ٹپہ  
پگلا

پاگل

امبلی

امب

السوڑ

آلسی  
عاشقو

عاشق

گڻڪو

گڻڪا

ڏھولڻ

ڏھولا  
بڻاں

بنرا

ڪنوں

ڪڙل

پنھل

پڻوں

منوں

مُناں

مندھرڻا

مندھرا

ٺٺوري

ٺٺور  
لٺوري

لٺور

موڻو

موڻا

سڪڻو /سُڪڻا

سُڪا  
نساوڙا

نَسَنُ

لڪهاوڙا

لِڪهِنُ

گلاوڙا

گَلِنُ

رُلاوڙا

رُلِنُ

ولاوڙا

وَلِنُ

رُساوڙا

رُسنُ

پُهاوڙا

پُهَلِنُ

پلاوڙا

پَلِنُ

بهاوڙا

بُهَلِنُ  
گهڙي

گهل

ڪهڙي

ڪهل

سلهڙي



سلڙھ  
دلڙي

دل

ڇهڙي

ڇهل

جهڙي

جهل  
تهڙا

ٽهل

ٽلڙا

ٽل

پُهڙا

پُهَل  
کورڙي

کوری

ٺورڙي

ٺوري

ڏهورڙي

ڏهوري

پورڙي

پُوري

بهورڙي

بُھوري

بورڙي

پوري  
گورڙا

گورا

کورٹا

کورا

ڈورٹا

ڈورا  
جھورٹا

جھورا

بھورٹا

بھورا

اورٹا

اُورا

لیرٹا

لیرا

گیرٹا

گیرا

زیرٹا

زیرا  
پھیرٹا

پھیرا

بیرٹا

بیرا

ایرٹا

ایرا  
بُلہٹا

بُلہا

چھلڙا

چَھلا

للڙا/للڙي

للا/للي  
ڪلهڙا/ڪلهڙي

ڪلها/ڪلھي

ڏهلڙا/ڏهلڙي

ڏهلا/ڏهلِي

چلڙا

چَھلا

ٽهلڙا/ٽهلڙي

ٽهلها/ٽهلھي

پهلڙا

پُھلا

تهلڙا/تهلڙي

تهلا/تهلي  
پهلڙي

پھلي

پلڙاپلڙي

پلا/پلي

بهلڙا/بهلڙي

بهلا/بهلي  
ويلهڙا

ويلها

نيلڙا/نيلڙي

نيلا/نيلي

سيلهڙي

سيلهي

ميلڙا / ميلڙي

ميلا / ميلي

ليڙا / ليڙي

ليلا / ليلي

ريلڙا

ريلا

ڏيلهڙا

ڏيلها

دهيلڙا

دهيلا

ٿهيلڙا

ٿههيا

تهيلڙا / تهيلڙي

تههيا / تهيلي

پيلڙا / پيلڙي

پهيا / پهيلي

پيلڙا

پهيا

#گالهڙا / گالهڙي

گاهيا / گاهي

چالڙا

چالا

جالڙا / جالڙي

جالا / جالي

پالڙا

پالا

ڪهاڙا

ڪهاڙا

تھاڙي

تھاڙي

والڙا/والڙي

والا/والی

لاڙي

لاڙي

ڪاڙا/ڪاڙي

ڪالا/ڪالي  
ڇهاڙا/ڇهاڙي

ڇهاڙا

جالڙا/جالڙي

جالا

تالڙا

تالا

ايڙا/ايڙي

ايڙا/ايڙي

لوڙا/لوڙي

لوڙا/لوڙي

ڇوڙي

ڇوڙي  
جيڙا/جيڙي

جيڙا/جيڙي

روڙا/روڙي

روڙا/روڙي

ڪوڙي

کوڏي

ڏوڏڙا/ڏوڏڙي

ڏوڏا/ڏوڏي

توڏڙا/توڏڙي

توڏا/توڏي

بوڏڙا/بوڏڙي

بوڏا/بوڏي  
بوڙڪا/بوڙڪي

بوڙا

چهالڪا

چهالا

جالڪا

جالا

پالڪا/پالڪي

پال

تهالڪا/تهالڪي

تهال

ڏهولڪا/ڏهولڪي

ڏهول  
وڌڪا/وڌڪي

وڌا

سوڀڻڪا /سوڀڻڪي

سوڀڻا

وڀڙڪا/وڀڙڪي

وڀڙا  
!ڪهڀڙ ڇه /ڪهڀڙ ڇي

ڪهڀڙ

'مندهر ڇه / مندهر ڇي

مندھرا

(ڏانڊالچہ / ڏنڊالچي

ڏنڊالي

مهرچہ

مہرا

سکچہ / سکچي

سُکا

بغوچہ / بغوچي

!بھٽڙا يا بھٽوڙباغ

بھٽ

پھٽوڙہ

پھيٽا

جھٽڙہ

جھٽ

پٽڙہ

پٽ

پھٽڙہ

پھٽ

بلوڙہ

پال

ولوڙہ

ول

#جھڪڙا يا جھڪوڙہ

جھڪا

!بٽڙا يا بٽوڙہ

باتا

ڪھٽوڙہ

ڪھوٽا

جھلوڙه

جھل

بندوڙه / بندڙه

بند  
جالڪ

جالا

پھوتڪ / پھتڪ

پُھوت

لُولھڪ

لُولھ

ڏالڪ

ڏل

ويلڪ

ويلا

ڏھولڪ

ڏھول  
ڪالڻا

ڪالا

بورڻا

بوري

پروڻا

پڙوڻ  
سيلھوڻا

سلھ

حلوڻا



جال

سروٿا

سير

مٿهوا مٿهل

مٿها

بهڙاڪو

بهڙا ڪا

ٿلهو

ٿهلا

گورڙو

گورڙا

پتلو

پتلا

ڪالو

ڪالا

سڇو

سڇا

لمبو

لمبا

سُڪو

سُڪا

ٽِڪڙا

ٽِڪا

بڪهڙا

بڪها

چہاڑا

چہلا

بَرڑا

بَر

جَٹڑا

جَت

جھکڑا

جھکا

ٹوالی

دیوالی

نندر

ننید

تتر

تیتیر  
بگانہ

بیگانہ

مٹھا

میٹھا

کل

کیل  
سدھی

سیدھی

چہل

چہیل

تکھے

تیکھے

تزاب

تيزاب

پغام

پيغام

پشمان

پشيمان

گذر

گيڊر

سدها

سيدها

دوانه

ديوانه

نچه

جهينڪ

تکھی

تيکھی

پودنه

پودينه

پنل

پينل

بگانی

بيگانی

بمار

بیمار

گھنڻ

گھونگھڻ

چنج

چونچ

جتي

جوتی  
پشاک

پوشاک

اکھلی

اوکھلی

گدام

گودام

جهمر

جهومر

ٺهڪ

ٺهوک

گهٽ

گھونٽ

سراخ

سوراخ

رزڪار

روزگار

دهپ

دهوپ  
چلها

چولها

پليس

پولیس

اچا

اونچا  
پراڻا

پراڻا

دائھ

دانھ

وانُ

بان  
رائی

رائی

پائی

پانی

تنُ

تن  
جیونُ

جیون

مانُ

مان

گپھنُ

گاڀھن  
چھئی

چھئی

چنُ

چنھ

کٲلی / کٲٲلی

کٲٲلی  
اٲلا / اٲٲلا

اٲٲا

جٲلے / جٲٲلے

جٲٲے

کٲاٲٲ

کوپاٲ

دٲٲہ

دٲو

صحت وٲد

صحت مند

دٲوڑ

دٲول

تٲولی

تٲوڑی

ٲکاڑا

اکیلا

تاڑی

تالی

کریڑا

کریلا

تٲولے

تٲوڑے

تٲگڑی

تٲگلی

روگ

روگ

واگ

واگ

بھوگ

بھوگ

پھوگ

پھوگ

چوگ

چوگ

پگ

پگ

بھاگ

بھاگ

سوگ

سوگ

جوگ

جوگ

ساگ

ساگ

راگ

راگ

جگ

جگ

رزکار

روزگار

پھوگ

پھوگ  
ڌنگ

ڌنڪ

لوڪ

لوگ

ٿرنگ

ٿرنڪ

لوڙ

لفظ

ڪهڀرني

فڀرني

پهڻه

فڻه

گنود

غنود

غنستاخي

گستاخي

جگرافيہ

جغرافيہ

بالڪ

بالغ

غلاب

گلاب

غزران

گزران

غراري

گراري



دماک

دماغ

غمان

گمان  
غستاخ

گستاخ

نغارا

نقاره

گونه

غوطه  
ماف

معاف

تویت , تویند

تعویذ

اجاز

اعجاز

قیده

قاعدہ

بدت

بدعت

الان

اعلان

مافی

معافی

انتقاد

اعتقاد

اتبار

اعتبار

پیچک

پیچش

سنوائی

شنوائی

قمیض

قمیص

سلوار

شلوار

مشوم

معصوم

تاس

تاش

بھیڑ

بھیڑ

وٹے

بڑے

کوڈی

کوڑی

بڈھے

بوڑھے

بڈھیپا

بڑھاپا

کھڈا

گڑھا

ٲڏها

ٲوڙها

وڏائي

ٲڙائي

وڏا

ٲڙا  
ٲوڙي

دوٲري

چٲڙاسي

چٲراسي

ٲڙده

ٲرده  
ملم

مريم

خليدار

خريدار

ٲوڙا

دوٲرا

تھڙتھلي

تھرتھري

ٲڙوال

ٲربال

المائڙي

الماري

ٲٲٲٲ

چھیک

چھید

گر جھ / گجھ

گدھ

ڈوالہ

دیوالہ

ڈاڑھ

داڑھ

یزیز

یزید

ڈپوا

دیا

ڈدھ

دودھ

بدخ

بطخ

تماخوں

تمباکو

میکھ

میخ

گچھا / غوشا

خوشہ

ابرخ

ابرق

تڑا کا

تڑا خا

چرکھ

چرخہ

بندوخ

بندوق

وساخ

بیساکھ  
نخشہ

نقشہ

ملخ

ملک

دوزکی

دوزخی  
متہاجی

محتاجی

ہل

چیل

متہاج

محتاج

لاج

جنڈ

جنڈ

جالا

جالا  
مٹہاج

مٹھاس

ٹوٹا

ٹکڑا

ٹٹھا

دیکھا

تھکیڑا

تھکاوٹ

پالٹ

پالک

ورنڈ

وارنٹ  
بکوات

بکواس

شیت

شاید

تہجت

تہجد  
کوشٹ

کوشش

تویت

تعویذ

ڈنڈ

دانت  
بہیت

بہید

شخت

شخص

مسیبت

مسجد  
پلیت

پلید

آندر

آنت

ٹانگا

ٹانگا

بوکی

بوکی

بوری

بوری

بوٹ

بوٹ

بچہ

بچہ

بور

بور

بیڑی

بیڑی

بوجھ

بوجھ

بول

بول

بوٹی

بوٹی

پہل

بیول

پڈھا



بڈھا

بالٹی

بالٹی  
بیہر

بابر

بریکی

باریکی

بزار

بازار

شکیت

شکایت

شہانہ

شابانہ

چلاکی

چالاکی

پھگن

پھاگن

پلان

پالان

پنجواں

پانچواں  
برات

بارات

بدام

بادام

بدامی

بادامی  
گاج

گرج

بیٹھے یا ایٹھے

ادھر

ہک

ایک  
ہفیم

افیون

ہوٹھے یا اوٹھے

ادھر

ہوچھا

اوچھا

اکھ

آنکھ

اشنا

آشنا

اٹار

آٹار  
اواز

آواز

ارام

آرام

ازاد

آزاد  
اخ

آخ

اسان

آسان

اواره

آوارہ

افرين

آفرین

اٹھ

اُٹھ

اک

آک

اسمان

کھویجے ، اٹھیجے ، ڈیویجے ، ولیجے ، روئیجے ، مریجے ، جڑیجے

کھاوے ، حاوے ، پیوے ، سیوے ، پاوے

مرے ، بھجے ، اٹھے ، جمے ، خُلیے ، چکھے ، جکھے ، جڑے ، جھرے

بن ، کھاندے ہو ، کھاندے ہیں ، کھاندے ہوندے ، کھاندے ہوسن ، کھاندے ہوسو ، کھاندے ہوسوں ، کھاندے ہوون ہا ، کھاندے ہوووبا ، کھاندے ہوں ہا

کھاندے پنین ، کھاندے ہاوے ، کھاندے ہاسے ، کھا چکے ہن ، کھا چکے ہو ، کھا چکے ہیں ، کھاندے

، ڈھورے ، سنارے ، غوشے ، گالھے ، وچھیرے ، ہیجڑے ، اوپرے ، پرائے ، چنگے ، گندے ، چٹے ، کوڑے ، کوڑھے ، سوہنے ، وڈے ، چھوٹے

، پانھے ، تڈے ، اپئے ، بچے ، بلے ، پترے ، جھانولے ، چوہڑے ، چلھے ، دھاگے ، دنبے ، کنوارے ، دیرے ، چھیلے ، چندرے ، دیگڑے ، دلے ، اوکھے ، بھور

پھیری

پھیر

ڈھینگری

ڈھینگر

دنبڑی

دنبڑ

ٹیری

ٹیر

تھپڑی

تھپڑ

جھجھری

جھجر

گندڑی

گندڑ

کھنگھری

کھنگھر

پھپھڑی

پھپھڑ  
تھگڑی

تھگڑ

گنڈھڑی

گنڈھڑ

ٹھیکری

ٹھیکر

، حاجی،نائی ، یہودی، حلوائی ، قصائی ، فرنگی، بنگالی، بھنگی، کھتری، ہاتھی، امریکی ، افریقی ، ضدی، بٹھی، موچی، پاولی، بوڈی، مراٹی ، کجھ اسمائے مذکر۔ دھوبی ، جوگی، پارسی، درزی، مالی ، بھکاری، چودھری

بگی ، نیلی ، پیلی ، ساوی، غلابی ، عنابی ، چٹی، کوڑی، سچی، کوڑھی، گدڑی، کنہری، کاٹی، ڈوری، گونگی، لنگڑی، سوڑی، پولھی، گنجی -اچی، لمبی، منڈھری، گپٹی، بٹھیلی، جھکی ، رتی، ری ، پھتکاری، تھپکی ،ٹپنائی، تنبئی، ڈببھئی، ٹھکانی ، چُھٹی، بڈھی ، رادھی، کُہائی ، گھسائی ، لڑائی، لکھائی ، مروڑی، واڈھی، واہی، وہاجی - اہالھی، اُپتری سُپتری، اچھلی ، اڈاری، اُساری ، اگلی ، اگاڑی ، پاگھی، بھگی، بھنوالی ، بھروڑی، پدھرائی ، پناکی ، پنچائی ، تاری، پھڑکا کری ، روٹی ، سیڑھی، استانی ، مچائی ، پٹھائی ، کاٹی، بھینجی ، ڈاڈی، نانی، ماسی ، مامی ، چاچی، رتی، بگی ، پیلی ، ساوی، کالی ، چھوکر ی ، بھٹنی، مچھی، مرغابی ، تتلی ، گلہری ، چھپکلی (کرلی)، قمری ، ٹوکر ی ، پہاڑی، ہتھوڑی، پیالی ، چرخ ی ، تختی، ٹوپ ی، مولھی ، چھڑی، ٹو گھوڑی ، مرغی، بکری، کھوٹی، مکڑی، بلی، ہرنی ، مورٹی، شیرٹی، کیوٹری ، ہتھنی ، مینڈک ی، رنبی، سیناری، کلتری، کلوتری، کانٹی، چونڈھی، کنگھی، سوئی گندوئی ، کھٹی، ڈانتری، چمچی، نڈی، پڑچھی ، پچھی، بیڑھی، رسی ، چرخ ی ئی ، ڈپھی، کھاڑی، چھپی، منگری ، پتروٹی، جھجھری، ٹولی، منگھی ، ولٹوئی، ڈوباوی، مٹی، منڈھائی، سنگی، کلھوٹی، منھی ، تھالی تپسی، وہول گھڑونجی، کاتی، چھری، ڈیوٹی، سو

ازی، دکنی ، عجمی ، مصری گردی ، ہندی ، بلوچی، سندھی ، حنفی ، سنی، بدوی ، پارسی، یہودی، عیسائی ، صدیقی ، بنارسی، علوی، فاروقی وچی، جھنگوچی، دہلوی ، پاکستانی، بھارتی، ایرانی ، امریکی ، عراقی، عربی ، فارسی ، مکی ، مدنی، حجازی ، ترکی ، افغانی، ترکستانی ، شیر شہری ، دیہاتی ، پہاڑی ، دمانی ، دیسی ، وطنی ، ملتانی ، لاہوری ، پشوری (پشاوری)، ڈپروی ، بہاولپوری ، تھلوچی، بر کیٹوی ، والی ، چیلکی ، سنگھارپٹی، نتھلی ، چونبھ کلی، ہسی ، دستی ، جوڑی، آرسی، مندری ، جھاری، پٹھی (انگوٹھی) ، نسی، بسنتی ، پٹری کجھ گاہنیں (زیوریں) دے نان، جھمکی

مرگی، ٹھڈی بیماری (تپ دق) ، خرسی ، ابھاسہنی ، الٹی ، ہڈکی ، ڈ کرمچی ، خاکی ، غلابی ، سنہری ، کیسری، جامنی ، انگوری، مہندی ، کنوڑی، مَرھنی، گھسنی، مَرچی، پکی (بتہ دی)، مکڑ بڈی، دُنی، کھیری ، چھوئی (گوڈے دی)، نلی ( بانہ یا جنگھ دی بڈی)، ویٹی، بُکی (گردہ) پٹی ، ٹلی ، تلی ، کھاڈی، ڈاڑھی، گچی، گھری ، چربی، چپچی انگل، کوپری، چھاتی، پیلی، سنگھڑی، ختی، مگی چاچی ، مامی ، ماسی ، نانی ، ڈاڈی، بھتریجی ، بھنیجی، دھی، پوتری، ڈوبتری ، سالی، سکی ، مترانی ، ڈرائی، بھرجائی، سکوائی - گوبھی ، مولی ، گاجری ، میتھری ، رتی مرچ، بھنڈی ، توری

انڀلی ، منڱ پھلی، کچری، گھمانوڻی (خوبانی) ، گری،گمبھیری (مڻھا)  
 ، ڏکھاری، شیکاری، لیاری، پاؤلی، پؤلی، گپالی، موجی، نائی ، قصائی، حلوائی ، دھڻوائی ، مستری، دھوی، تیلی ، چاکی ،طبخی، مراڻی، درزی  
 کھڙاری، پساری (پنساری)، ونگاری، نلاری، مداری  
 کھڻائی ، یاری ، مڻھائی ، سنجائی، ننگائی ، ستهرائی، مڻائی، ڳھکائی ، گھڙائی ، گلاڻی ، چڻکی ، گھڻکی ، بهری، بلیکی ، ڏڏھپی، کڙکی، بهنکی  
 نیکی ، بندگی، زندگی، صفائی ، گرمی ، سردی ، نرمی ، جوانی ، دیوانی، ودھیکی ، جُھپرکی ، تکھائی ،  
 روضہ ، نسخہ، صفحہ، خواجه ، سقمہ، بندہ ، صوفہ ، پیشہ، تیشہ، خرچہ، چرخہ ، حقہ ، ڏبہ، دورہ، طرہ، شیشہ ، آئینہ، پیمانہ، لمحہ، وقفہ، پیسہ  
 وحشی، وسامور، وسواسی، وسواسن، وگاڙو، وللا، وللی ، ونجاو، وبرا، وِمی ،ویری، ویرن، وِمن ، وِبری، وِیل ڏاچی، وڏھی خور، وڏھی ڏنیو  
 وڏواتا، وڏکوتھا، وڏکنان، وڏپیرا، واچھل، واشیل،  
 وڏو، دھائو، پھاپو، سَدو، پارو، ماندھو، صابو، رائو، جامو، کالو  
 جَوانن، مُوڏن، بھکارن، اَلھادن، پُجارن، جوگن، شِکارن، سوالن، قیدن، مالِڪن، یھودین، بنجارن ، نانن، چودھرائن، بنگالن، پڙوسن، درزن، پارسن  
 مالن، دھوپن ، بھنگن، پارسن، فرنِگن، مراڻن، ملوڊن، بھونڏن، بُلھن، قصائن، ڏپن،سَئین، ارڻین، حلوائن، بڻھارن،  
 اڏان ، بیان، بڊھان، پُران، ڏُبدان، کھنڀھان، مَندھان، وڏان، ڻپان، جھنگان  
 ن، چلڪن، پڻن، پڇلن، پھتڪن ، پھپن، ترمِن ، ڻپن، حُلن، چُبھن، چُھلڪن، ڏلن، رنڪن، سڙن، شوڪن، کُھرڪن، گُھرڪن،کھمن، شَرڪن، وِلن،وِپن، ھوڪن  
 اڏھن، اُپلن، اٽڪن، بڻڪن ، اڙڪن، پلڪن، چَھلڪن، ڏھلڪن، گھلڪن، بُلڪن، ٽلڪ  
 جومارن ، بیون، مریجن،بڊھن ، ڏپڪھن، روون، رویجن  
 نچوڙا

نچوڙن

نڪھڙت،نڪھڙا

نڪھڙن

نڪال ، نڪالی

نِڪلن

نَچا، نچئی

نَچن

نَپيڙا

نَپيڙن

ناچبا

نَچاون

نِتارا

نِتارن

نيھا

نيھاون

نَپيڙا

نَپڙيجن

نوا

## نِوانوں

نِمْرَت

فَمَرْنِ

نَا

نِپاون

نَمِرا

نِمْرَ اَوْنُ

## نِکھرت

نِکھرن

نِبھنی، نِبھت

فِيهِنَّ

نلی ، نالا، نانہہ، نب، نٹ، نژی، ٹٹا، نعل، نیل، نغارہ، نک چونانگیل، نہیرن، نہاندرو، نہترا، نیچا۔  
نت، نحق، ندان، ندیدہ، یدھورا، یراس، نراض، یقابل، نینگلا، نگوسانوان، نلاق، نمراس، نمراس، نوموز، نہوند، نہایا، نہائی، نہاگا، نہاگی۔  
نکماں، نکٹھو، نہپر، ندھنکا، نکارہ، نمرد، نکھند، نحیف، نچ  
مکھن، مکھٹاں، مجھنگ، مٹھو، مٹھا، مٹھرا، منتھار، مہریان، مہذب، مہاندرا، موہری، مومن  
نگری، میسواک، مشعل، مشین، منجن، منگی، منجھولا، مندھئا، مولہا، مہار، مہر، مہرا، میخ، مٹھا، منگی، منگھا، مندھائی، مگتر، مٹی، مٹورا۔  
مالھا، مانجا، موڑھا، مرلی، مرتبان، مسوائی، منگر، م  
سا، میسنی، میسنئا، مٹھر، مٹھاج، مٹھا، مٹھی، مٹھرا، مٹھڑی، مچھل، مٹھوڑ، موالی، مونجھا، منتارا، منتاری، مکرا، مکریل، مرکھی، مریل، مریلا  
ا، مٹر، مریلا، مستور، مشتبہ، مشکا، مشکی، مغرور، مکار، ملام، مم، منچر، مندیل، منچیر، مندھرا، مندھری، مندھول، مندھوڑ، مودی، میکن، می  
ماندھو، ماد، مریلا، مپا، مٹرڈ، مجھ ڈنڈ

، مری، موڑ، مروڑ، مروڑا، مروڑی، مُرکار، مُرک، مُسک، مُسکار، مکیوا، مانج، مُکلاوا، مگر، میل، مَندھ، مَنڈ، مَنوت، مَنیوا، مَنگئی۔  
 مار، ماپ، ماٹھ، مان، مُتراکا، مَچ، مَچھرا، مَچھرا، مَچھ، مَچھل، موت  
 تَرب، مَخبَری، مُدت، مَختیار، مَخل، مروڑ، مزدوری، مَنت، مَن مَنیج، مَنجھاری، مَونجھ، مَندھئی، مواتی، مَونگھ، مَوکھ، مَہاگ، مَہورت، مَپھ  
 ماتم، مارگٹ، مارداہڑ، مان، مانگ، مانج، مپ، مَت، م  
 اٹم، بَیہوم، شرم، دَہرم، بَہرم، کَرم، سَتم، ظلم، نَم، مَدم، مَسلم، مَہم، مَقام، ماتم، اودھم، گودھم، گَہم، رَشوم (رسم)، دَہوم۔

للسلام

سَيَمَنُ

دَهِم

دَهْمَنْ

گم

گھمن

ۛ

كِهْمَن

جھوم

جھومن

سم

سمن

چم

چمن

ترم

ترمن

، لپور لپرائی، لوپر، لپیٹ، لتاڑ ، لوٹی، لٹک ، لٹکا، لسک، لسکار، لسکار، لشکارا، لک، لکن، لکن، لکھانی، لگ، لمبائی ، لانگھا، لوند، لیٹ، لجھ  
، لذت، لڑاند، لعنت، لگوند، للہر، لمین، لمبان، لندھپ، لوڈ، لوڈا، لوس، لوش، لونڈک، لوبھ، لیاقت، لیپ، لیس، لیک ، لبھت، لچھن، لیکھ، لکھت، لاپ  
لاٹ، لاح، لاڈ، لاغری، لاگ، لاگت، لالچ، لالی، لابی، لپاڑ، لیکار، لتڑ، لح، لچ، لچپ، لچک، لچئی  
لال، پلال، دھمال، گڑدھال، کڑوَل، پکھال، آخِل، اڑتل، بچھل، اٹکل، ٹوکل، ٹھڑتھل، ٹھاڈھل، جنجال، جھال، جھول، جلول ، چھول ، خیچل، دروہل  
بگول ، چٹول ، رتول، ساول، سوچھل، کوئل، اوئل، سویل ، آلیل، الول، م  
اچھال ، اگال، بھال، پچال، سنبھال، نگال، پڑتال، انگھال، ادھال، چال، گال۔  
بھل ، بِل پُل، جَھل، جُھل، سَٹھ، سِلھ، گل، کل، نل، ہل، رَحل، تھال ، بوتل، کجل، حال، دول، ڈول، بگل، پتل، ترانگل، تریال، ٹول ، پٹھل  
ا، لنتڑ، لنتور، لنگڑا، لنگڑی، لوت، لوطی، لوترا، لوتا، لوشی، لوشن، لوفر، لوگڑ، لولھا، لولھی، لومبڑ، لوبھی، لوبھن، لوتھ، لیچڑ، لتھڑ، لڈھ، لاغر  
لچ، لچا، لچی، لچر، لچری ، لڑاکا، لڑاکو، لڑاکی، لعین، لعنتی، لفنگا، لگا، لگی، للا، للی، للھری، لم چچڑ، لمِل، لُنْب، لُندھا، لُندھی، لُندھوڑ، لُندپچھ  
ڑ کناں، لا تکا، لالچی، لامواسا، لئی لگ، لوسی، لباسی، لباسن ، لیاری ، لپاٹی ، لپاٹا، لپوشک، لپوشا، لپوشی، لپوشن، لٹو، لٹیرا، لٹور، لٹوری، لغور،  
بری منفی صفت کیتے ورتئیے ویندن تے او ل کن شروع تھیندن۔ لا پرواہ ، لا پ  
لاٹوں ، لاکڑا، لاگ، لانہ، لٹھ، لڑکا، لغام، لغر، لفٹ، لوٹا  
ڈھونگرل

ڈھونگر

ہوڈل

ہوڈ

چکِل

چک

کپڑیل

کپڑ

ٹراکل

ٹر

تھوڈل

تھوٲُ

ٲُكريل

ٲُكر

چَگل، چکیل

چَک

ناسیل

ناس  
اڑانگل

اڑانگا

ہٲُل

ہٲُا

مندیل

مندہ  
کوڑیل

کاوڑ

ٲُندال، ٲُندل

ٲُند

غصیل

عُصہ  
ٲُہٲُہل

ٲُہٲُہ

مٲُہل

مٲُہا

ترکل

پلنیل



پَلَنُ

اَکھڑیَل

اَکھڑَنُ

بَچِیٹَل

بَچَنُ

اُبھریَل

اُبھرنُ

اِٹکیَل

اِٹکنُ

اڑیَل

اڑَنُ

بَہسکیَل

بَہسکنُ

اَپھریَل

اَپھرنُ

اَپڑیَل

اَپڑَنُ

رَنگ

رَنگَنُ

ڈَہنگ

ڈَہنگَنُ

مَنگ

مَنگَنُ

ڈَہنگ

ڈَہگَنُ

ڈَہنگ

ٲٲگن

رٲنگ

رٲنگن  
ونگ

ونگن

بونگ

ٲونگن

ٲنگ

ٲنگن

#مصدرى ماده , امر

مصدر

#مصدرى ماده , امر

مصدر

#مصدرى ماده , امر

مصدر

10- كجھ سرائىكى مصادر دے مصدرى مادے , امر جنهين دے اخيرء چ ”گ“ آندے -  
گلھڑ

گلھ

لٲڑ

لٲ

دنٲڑ

دن

چھلٲڑ

□ -

جھگ

جھگن

ٲھگ

ٲھگن

ٲرگ

ٲرگن

ڈھگ

ڈھگن

تیاگ

تیاگن

چُگِ

چُگن

لگ

لَکِن

بہوگ

بہوگن

جاگ

جاگن

ڈھگ

ڈھگن

بُگِ

بُگن

تَگِ

تگن  
جھاگ

جھاگن

سنگِ ا

سَنَگَن

پُگ

پُگن

رہا، گالہا، گالہی، گالو، گٹکا، گٹکی، گچل، گڑدھالی، گلہوڑ، گلور، گنڈھیلا، گوڈل، گہڑی، گٹھ مٹھا، گپی، گیپٹی، گیپڑی، گوڑھی، گوڑھا۔

گاہک، گھٹکا، گاڈا، گاڈی، گاری، گانا، گانی، گت، گئی، گڈی، گپٹا، گپٹی

مُساک، راگ، مِہاگ، ساک، کاک، واگ، لاگ، بگ، بھگ، جھگ، پگ، جگ، ٹگ، پھوگ، دگ، وگ، واگ، لنگ، بنگ، جوگ، چوگ، لوگ

بُھگ، بَھگ، ٹُھگ، مُگ، نبھاگ، بھوگ، روگ، سبھاگ، آگ، مُلاگ، سُبھاگ، مِہاگ، نِہاگ، بھاگ، لاگ، جاگ

بَہنگ، وَنگ، جہنگ، رَنگ، چَہنگ، لَنگ، پَنگ، پَلنگ، چَنگ، تَنگ، ڈَہنگ، گَنگ۔

چُنرنگ، ادھرنگ، ابھرنگ، ملنگ، اُتنگ، مَجھنگ، شُرنگ، چُرنگ، غُرنگ

، گڙڪ، وڏهڪ، سڙڪ، ڏالڪ، پلڪ، بڙڪ، لوڻڪ، پڻڪ، بپڻهڪ، وڻڪ، گهرڪ، دهمڪ، سانوڪ، چيلڪ، عينڪ ، بَهڙڪ، جهڻڪ، گجڪ، شارڪ  
گولڪ، پالڪ، چهمڪ  
گڏهنواں ، کوٻترا، گسنگ، گُراه  
تڙڪ ، ڏالڪ، چڻڪ، پهُونڪ، خُندڪ، ڏپهڪ، پُهڻڪ، كهُرڪ، كالڪ، لُوسڪ، رَتنڪ، كُهڻڪ، بڙدَهڪ، بڙڪ  
اُٿڪ، اُٿڪ، اُڻهڪ، آجهڪ، اُڙڪ، بَهرڪ، بَرڪ ، بُڙڪ، جهڻڪ، جهڻڪ ، چرڪ، چڻڪ، ڏسڪ، پسڪ، دهنڪ، پڻڪ، بمڪ، مِهڪ ، مسڪ  
چڙاڪ

چڙن

جهڻاڪ

جُهڻ

رِهاڪ

رَين  
تراڪ

تَرَ

پهڻاڪ

پهڻ

تڙاڪ

تڙڪن

پهراڪ

پهرن

بهڙاڪ

بهڙن

پهڻڏاڪ

پُهڻڻ  
بهجاڪ

بهجن

نساڪ

نَسَن

پناک

پننْ  
کڏاڪ

گڏنْ

چڻاڪ

چڻنْ

اڏراڪ

اڏرنْ  
غرڪ

غرڪنْ

ڏهمڪ

ڏهمڪنْ

پَهتڪ

پهتڪنْ

بهونڪ

بهونڪنْ  
بسڪ

بسڪنْ

مرڪ

مُرڪنْ

سيڪ

سيڪنْ

ڏوڪ

ڏوڪنْ  
پَهڙڪ

پهڙڪنْ

پُھوک

پھوکنُ

سِک

سِکنُ

تِڑک

تِڑکنُ

بوک

بوکنُ

پھرک

پھرکنُ

بڑک

بڑکنُ

بڑک

بڑکنُ

لُسک

لُسکنُ

برک

برکنُ

بھرک

بھرکنُ

اڑک

اڑکنُ

تھڑک

تِهڙڪُن

اڙڪ

اڙڪُن

آجهڪ

آجهڪُن

اٿڪ

اٿڪُن

ساڻوَن ، ساڙا، سازشي، ساڪڙ، سامري، سانھ، سانھاَن ، سنڏھا، سڀاڙ، سڀڙا، سٺ حرام دي، سٽيَ باز، سرڪش، سرپھري  
، آرداس، آسيپس، افسوس، اِڪاس، اڪليس، بڪواس، پياس، بھڙاس، حيڙاس، حَسّاس، حَواس، ستيناس، ڀراس، سنياس، ڀڀلاس ،وسواس، مڻھاس،لباس  
آس، آلس، اِحساس

ڀس

ڀسُن

وس

وسُن

نس

نسُن

گس

گسُن

ڪھس

ڪھسَن

ڱس

ڱسُن

رس

رسُن

ڏس

ڏسُن

دس

دسُن

ڀھس

ڀھسُن

پس

پسن

پس

کھاندِ نس

الا، رپالی، ردی، رذیل، رٹل، رنڈل، رنوں، رنوڑ، رقیب، رکل، رگل، رلوڑ، رنڈی، رنگیلا، روڈا، روڈی، روگی، رول، ریچک ماریں کھویندے  
راڑا، راڑی، راشی، راخس، رب

تلوار، پھوہار، نسوار، پرکار، جوار، عار، آر، مار، کار، تکرار، انتظار، غار، پہار، ہار، پار، اروار، تار، ٹار، جہار، نِسار، الار، کٹار، ونگار  
، پیار، وِپار، معیار، ادھار، بار، ویار، ہزار، ہسوار، ہتھیار، کم کار، اِصرار، اِتبار، اِقرار، اِنکار، سَردار، وار، حار، یار، خار، بیمار، شہر، قہر،  
شُکار، ہزار، بَرار  
ہشکار

ہُشکارن

دھتکار

دھتکارن

ہچکار

ہچکارن

گھمکار

!گھمکارن، گھمکن

پھٹکار

پھٹکارن

گھپکار

گھپکن

مسکار

مُسکن

ٹہسکار

ٹہسکن

پُکار

پُکارن

اُبھار



اُبهرنُ

اٲٲكار

اٲٲنُ

گهركار

گهركنُ  
گجكار

گجنُ

عُركار

عُركنُ

چكار

چيكنُ

كٲكار

كٲكنُ

پهٲكار

پهٲكنُ

پكار

بوكنُ

شكار

شوكنُ

وچكار

وحنُ

كهٲكار

كهٲكنُ

، ڈانوں، ڈباس، ڈنی، ڈنڈکا، ڈنڈی، ڈندکی، ڈیہا، ڈیہی، ڈندون، ڈندالی، ڈندیلی، ڈولا، ڈولی، ڈولڑا، ڈولڑی، ڈپاوی، ڈپاوا، ڈوئی، ڈپوا، ڈپوٹا، ڈپوٹی، ڈاتری، ڈاکا، ڈاکن، ڈانگ، ڈنگوری، ڈوروں، ڈوم، ڈومنی، ڈورا، ڈوری، ڈوباری، ڈوباگن، ڈیلا، ڈیہیل، ڈتھا، ڈتھی، ڈڈھی، ڈکھارا، ڈکھاری، ڈکھڑبت، ڈکھی، اکن، ڈالا، ڈالو، ڈندو، ڈندل، ڈین، ڈیاگدرا، ڈڈو، ڈڈوں، ڈڈل، ڈڈیل، ڈراکل، ڈروپٹو، ڈلہ، ڈمریل، ڈمرا، ڈنڈی مار، ڈنگا، ڈنگی، ڈنگیلا، ڈوالہ، ڈوٹا، ڈٹل، ڈاتو، ڈٹ باز، ڈٹکی، ڈٹی، ڈٹیل، ڈٹوری، ڈاڑھو، ڈ۔ ڈاس، ڈبا، ڈبی، ڈبری، ڈپیکن، ڈوٹن، ڈوڈنی، ڈونگا، ڈھینڈھا، ڈھارا، ڈھاری، ڈھال، ڈھولن، ڈھکن، ڈھکنی، ڈھنگا، ڈھولک، ڈھولکی، ڈھیرا۔

تھیندن  
ڈپنی، ڈھاڈھی، ڈھٹا، ڈھٹی، ڈڈھ مٹھا، ڈڈھ مٹھی، ڈڈھو، ڈڈھل، ڈھرکپا، ڈھرکی، ڈھکوڑا، ڈھکوڑی، ڈھکیئل، ڈھلر، ڈھلوڑ، ڈاؤں، ڈیڈا، ڈیٹھ  
ڈاکو، ڈکیٹ، ڈپکا، ڈڈا، ڈڈا، ڈرگا، ڈرگی، ڈگی، ڈھگا، ڈپٹاں  
داسا، دگا، داڑھی، ڈھرا، داپھا، داپھی، دوری، دنوری، ڈرا، دھرمٹ، دستار، دستانہ، دستی، دف، دول، دمامہ، دیگڑا، دیگڑی، دیگ، دلا۔  
دابڑہ، دابڑی  
دادلا، دانا، ڈر، دردرنجاناں، درویش، دریادل، دعاگو، دلاور، دلبر، دلچسپ، ڈل دریا، دلدار، دلربا، دلیر، دوراندیش، دیرپا، دور بین، دیندار۔

ی، دوغلا، دھوکے باز، دیگڑا، دھاڑل، دھچر، دھٹم دھٹا، دھرتالی، دھرتالین، دھڑے وات، دھکڑ دھکڑا، ڈھوتا، ڈھوتل، دوس، دروبی، ڈن مک۔  
دایڑیلا، داغی، داغل، دانگی، دانگل، دروبا، دریٹھ، ڈرل، دغاباز، دغل، دکڑ، دگل، دلام، دلو، دل بھس، دماغل، دنبل، دودا، دودل، دوزخ  
باز، خائن، خبطی، خپڑ، خٹ، خٹل، خندکی، خچکل، خچرا، خرتل، خرچل، خرشیل، خرمغزا، خشکیل، ختمی، خشکا، خونی، خوشامدی، خونن  
خار

قت، جئیں ویلھے، جڈاں، جینویں، جیجھاں، جیجھئیں، جہو جھئیں، جہو جھئیں، جیویں جیویں، جتھاں جتھاں، جڈاں جڈاں، جیجھاں جیجھاں۔  
جتھاں، جتھوں، جنتے، جیڈے، جئیں پاسے، جئیں و  
چورس، چوچنڈا، چوبارہ، چوکاندھا، چودھار، چوطرفہ، چوسڑکا، چورابا، چوہٹہ، چو مکھی، چوکور، چوکنا، چوگنا، چوہٹھا، چواگھا، چوگرود  
پا، چچڑ، چترا، چترماں، چٹرننگ، چٹریل، چتکیرا، چٹپیرا، چندرا، چوڑچپٹ، چم چچڑ، چڑاک، چرتی، چرسی، چڑی مار، چغل خور (چغلیٹ)  
چیل، چنگو، چوٹھو، چچرا، چکھڑا، چیتھڑ، چپا، چیل، چوڑھا، چچا، چنبر، چاکر، چالباز، چپڑ، چ

طوفانی

روشن

گرم

سرد

مہنگی

خوش

آسان

چھوٹے

سرخ - نیلا - خوبصورت - شریف - چالاک -

خوشی

گیا

کپسے

-6شگریہ

اکئی (زیادہ قے)
