# Supplementary material for: Mixed Script Identification Using Automated DNN Hyperparameter Optimization
Source: Hindawi journal article supplement (doi:10.1155/2021/8415333), 2021-01-01
Supplement: f1 [file 8415333.f1.zip]

#NG #نقشے > <#NG پاکستانی> <.....> <پاکستانی> <# Sad پاکستانی> <زبانیں>  
# پاکستانی > <#NG گجراتی> <#N بلوچی> <#P سندھی> <#N سرائیکی> <#N وچ> <#  
بیٹھوں> <مفرید> <سروے> <کریندے> <سئیں> <دیاں> <الصوت> <تعلیم> <فیض> <شامل> <>>  
<سونہاں> <انڈیا> <برٹش> <وڈے> <اے> <لیکن> <هِن> <هَن> <نقشہ> <زبانیں> <ایچ> <>  
<لنگویچ> <حکومت> <چھاں> <تعاون> <بشمول> <ہندستان> <اپ> <سر> <فرید> <تے> <ڈتا>  
اساں> <وی> <بہوں> <دی> <تقریباً> <کاٹنی> <وسیم> <بڑایا> <پی> <نقشے> <ھے> <محقق>  
<برکت> <ڈی> <.....> <صرف> <وچ> <لینگویچ> <گجراتی> <دا> <اعلیٰ> <گئے> <کون> <>  
<سکدے۔> <آلے> <کیتن> <منظوری> <نال> <جو> <کون> <روضے> <ایندے> <تمام> <ھی>  
یافتہ> <انہاں> <سنہ> <#P #Sa ء> <بلوچی> <سال> <مطابق> <؟> <دے> <ڈیکھایا> <سرائیکی>  
<لیکن> <آلے> <وسیم> <صدیقی> <دی> <گالھ> <کریندے> <بیٹھوں> <شاعری> <جنہاں> <ناں> <>  
اساں> <فرید> <سئیں> <دے> <روضے> <دی> <چھاں> <تلے> <رہ> <تے> <شاعری> <دیاں> <لکیراں>  
<اے> <خواجہ> <سئیں> <دی> <شاعری> <دا> <فیض> <تے> <برکت> <ھی> <اے> <جو> <اج>  
<سروے> <وچ> <مفرید> <سئیں> <تے> <انہاں> <دی> <شاعری> <دا> <کون> <سونہاں> <کاٹنی> <؟>  
.....> <ابیں> <تحقیق> <کون> <لینگویچ> <سروے> <آف> <انڈیا> <دا> <ناں> <ڈتا> <گئے> <ابیں> <لنگویچ>  
<متحدہ> <ہندستان> <وچ> <تقریدھ زبانیں> <1887> <سال> <زبانیں> <دی> <تحقیق> <تے> <صرف> <کیتن> <>  
<یافتہ> <دے> <نال> <نال> <پی> <ایچ> <ڈی> <وی> <هِن> <بہوں> <وڈے> <محقق> <هَن> <جنہاں>  
ڈیکھایا> <ونج> <سکدے۔> <ابیں> <نقشے> <دی> <منظوری> <سر> <گریرسن> <هَن> <اپ> <اعلیٰ> <تعلیم>  
مطابق> <ابیں> <علاقے> <وچ> <بشمول> <سرائیکی> <ایندے> <وچ> <تمام> <پاکستانی> <زبانیں> <کون> <>  
مل> <یبائی> <30ء> <وچ> <برٹش> <حکومت> <دے> <تعاون> <نال> <بڑایا> <گئے> <نقشے> <دے> <>  
<خواجہ> <علاقہ> <1887> <صدیقی> <پاکستانی> <ابیں> <سندھی> <بلوچی> <گجراتی> <زبانیں> <شا  
<جلی> <تلے> <رہ> <ائے> <لکیراں> <ونج> <گالھ> <تحقیق> <گریرسن> <اج> <متحدہ>  
<شاعری> <دیاں> <لکیراں> <لیکن> <آلے> <وسیم> <صدیقی> <دی> <گالھ> <کریندے> <بیٹھوں> <> <آف  
ھی> <ھے> <جو> <اج> <اساں> <فرید> <سئیں> <دے> <روضے> <دی> <چھاں> <تلے> <رہ> <تے>  
کون> <سونہاں> <کاٹنی> <؟> <اے> <خواجہ> <سئیں> <دی> <شاعری> <دا> <فیض> <تے> <برکت> <>  
<ڈتا> <گئے> <ابیں> <لنگویچ> <سروے> <وچ> <مفرید> <سئیں> <تے> <انہاں> <دی> <شاعری> <دا> <>  
<تے> <صرف> <کیتن> <.....> <ابیں> <تحقیق> <کون> <لینگویچ> <سروے> <آف> <انڈیا> <دا> <ناں>  
<محقق> <هَن> <جنہاں> <متحدہ> <ہندستان> <وچ> <تقریبےن> <30> <سال> <زبانیں> <دی> <تحقیق>  
هَن> <اپ> <اعلیٰ> <تعلیم> <یافتہ> <دے> <نال> <نال> <پی> <ایچ> <ڈی> <وی> <هَن> <بہوں> <وڈ  
ستانی> <زبانیں> <کون> <ڈیکھایا> <ونج> <سکدے۔> <ابیں> <نقشے> <دی> <منظوری> <سر> <گریرسن> <>  
<گئے> <نقشے> <دے> <مطابق> <ابیں> <علاقے> <وچ> <بشمول> <سرائیکی> <ایندے> <وچ> <تمام> <پاک  
<گجراتی> <زبانیں> <شامل> <ها> <30ء> <وچ> <برٹش> <حکومت> <دے> <تعاون> <نال> <بڑایا>  
<> <پاکستانی> <زبانیں> <دا> <سرائیکی> <.....> <پاکستانی> <نقشے> <وچ> <سرائیکی> <سندھی> <بلوچی  
ہ> <تے> <شاعری> <دیاں> <لکیراں> <لیکن> <آلے> <وسیم> <صدیقی> <دی> <گالھ> <کریندے> <بیٹھوں>  
<برکت> <ھی> <ھے> <جو> <اج> <اساں> <فرید> <سئیں> <دے> <روضے> <دی> <چھاں> <تلے> <ر  
<دا> <کون> <سونہاں> <کاٹنی> <؟> <اے> <خواجہ> <سئیں> <دی> <شاعری> <دا> <فیض> <تے>  
<ا> <ناں> <ڈتا> <گئے> <ابیں> <لنگویچ> <سروے> <وچ> <مفرید> <سئیں> <تے> <انہاں> <دی> <شاعری>  
<تحقیق> <تے> <صرف> <کیتن> <.....> <ابیں> <تحقیق> <کون> <لینگویچ> <سروے> <آف> <انڈیا> <د  
بہوں> <وڈے> <محقق> <هَن> <جنہاں> <متحدہ> <ہندستان> <وچ> <تقریبیان> <1887> <سال> <زبانیں> <دی>  
گریرسن> <هَن> <اپ> <اعلیٰ> <تعلیم> <یافتہ> <دے> <نال> <نال> <پی> <ایچ> <ڈی> <وی> <هَن> <>  
<تمام> <پاکستانی> <زبانیں> <کون> <ڈیکھایا> <ونج> <سکدے۔> <ابیں> <نقشے> <دی> <منظوری> <سر> <>  
<بڑایا> <گئے> <نقشے> <دے> <مطابق> <ابیں> <علاقے> <وچ> <بشمول> <سرائیکی> <ایندے> <وچ>  
ی> <بلوچی> <گجراتی> <زبانیں> <شامل> <ه> <30ء> <وچ> <برٹش> <حکومت> <دے> <تعاون> <نال>  
ریندے> <بیٹھوں> <> <پاکستانی> <زبانیں> <دا> <وچ> <.....> <پاکستانی> <نقشے> <وچ> <سرائیکی> <سندھ  
اں> <تلے> <رہ> <تے> <شاعری> <دیاں> <لکیراں> <لیکن> <آلے> <وسیم> <صدیقی> <دی> <گ



اعری > <دا> <فیض> <تے> <برکت> <ہی> <ہے> <جو> <اج> <اساں> <فرید> <سنیں> <دے> <روضے>  
<تے> <انہاں> <دی> <شاعری> <دا> <کون> <سونہاں> <کانئی> <؟> <اے> <خواجہ> <سنیں> <دی> <شد>  
<سروے> <آف> <انڈیا> <دا> <ناں> <ڈٹا> <گئے> <این> <لنگویچ> <سروے> <وچ> <مفرید> <سنیں>  
1887 <سال> <زبانیں> <دی> <تحقیق> <تے> <صرف> <کیتن> <.....> <این> <تحقیق> <کون> <لینگویچ>  
<ایچ> <ڈی> <وی> <ہن> <بہوں> <وڈے> <محقق> <ہن> <جنہاں> <متحدہ> <ہندستان> <وچ> <تقریباً>  
<دی> <منظوری> <سر> <گریرسن> <ہن> <اپ> <اعلی> <تعلیم> <یافتہ> <دے> <نال> <نال> <پی>  
<سرائیکی> <اینڈے> <وچ> <تمام> <پاکستانی> <زبانیں> <کون> <ڈیکھایا> <ونج> <سکدے۔> <این> <نقشے>  
<حکومت> <دے> <تعاون> <نال> <بڑایا> <گئے> <نقشے> <دے> <مطابق> <این> <علاقے> <وچ> <بشمول>  
<وچ> <سرائیکی> <سندھی> <بلوچی> <گجراتی> <زبانیں> <شامل> <ہن> <30ء> <وچ> <برٹش> <دیبی>  
<دی> <گالہ> <کرینڈے> <بیٹھوں> <پاکستانی> <زبانیں> <دا> <پاکستانی> <.....> <پاکستانی> <نقشہ>  
<روضے> <دی> <چھاں> <تلے> <رہ> <تے> <شاعری> <دیاں> <لکیراں> <لیکن> <آلے> <وسیم> <صد>  
<دی> <شاعری> <دا> <فیض> <تے> <برکت> <ہی> <ہے> <جو> <اج> <اساں> <فرید> <سنیں> <دے>  
<سنیں> <تے> <انہاں> <دی> <شاعری> <دا> <کون> <سونہاں> <کانئی> <؟> <اے> <خواجہ> <سنیں>  
<لینگویچ> <سروے> <آف> <انڈیا> <دا> <ناں> <ڈٹا> <گئے> <این> <لنگویچ> <سروے> <وچ> <مفرید>  
<تقریباً> <1887> <سال> <زبانیں> <دی> <تحقیق> <تے> <صرف> <کیتن> <.....> <این> <تحقیق> <کون>  
ل <پی> <ایچ> <ڈی> <وی> <ہن> <بہوں> <وڈے> <محقق> <ہن> <جنہاں> <متحدہ> <ہندستان> <وچ>  
این <نقشے> <دی> <منظوری> <سر> <گریرسن> <ہن> <اپ> <اعلی> <تعلیم> <یافتہ> <دے> <نال> <نا>  
<بشمول> <سرائیکی> <اینڈے> <وچ> <تمام> <پاکستانی> <زبانیں> <کون> <ڈیکھایا> <ونج> <سکدے۔> <دا>  
<برٹش> <حکومت> <دے> <تعاون> <نال> <بڑایا> <گئے> <نقشے> <دے> <مطابق> <این> <علاقے> <وچ>  
ثانی <نقشے> <وچ> <سرائیکی> <سندھی> <بلوچی> <گجراتی> <زبانیں> <شامل> <ہن> <30ء> <وچ>  
<وسیم> <صدیقی> <دی> <گالہ> <کرینڈے> <بیٹھوں> <پاکستانی> <زبانیں> <دا> <.....> <.....> <پاکد>  
<سنیں> <دے> <روضے> <دی> <چھاں> <تلے> <رہ> <تے> <شاعری> <دیاں> <لکیراں> <لیکن> <آلے>  
اجہ <سنیں> <دی> <شاعری> <دا> <فیض> <تے> <برکت> <ہی> <ہے> <جو> <اج> <اساں> <فرید>  
<وچ> <مفرید> <سنیں> <تے> <انہاں> <دی> <شاعری> <دا> <کون> <سونہاں> <کانئی> <؟> <اے> <خو>  
تحقیق <کون> <لینگویچ> <سروے> <آف> <انڈیا> <دا> <ناں> <ڈٹا> <گئے> <این> <لنگویچ> <سروے> <دا>  
ہندستان <وچ> <تقریباً> <1887> <سال> <زبانیں> <دی> <تحقیق> <تے> <صرف> <کیتن> <.....> <این>  
<نال> <نال> <پی> <ایچ> <ڈی> <وی> <ہن> <بہوں> <وڈے> <محقق> <ہن> <جنہاں> <متحدہ> <دا>  
<سکدے۔> <این> <نقشے> <دی> <منظوری> <سر> <گریرسن> <ہن> <اپ> <اعلی> <تعلیم> <یافتہ> <دے>  
<علاقے> <وچ> <بشمول> <سرائیکی> <اینڈے> <وچ> <تمام> <پاکستانی> <زبانیں> <کون> <ڈیکھایا> <ونج>  
3 <وچ> <برٹش> <حکومت> <دے> <تعاون> <نال> <بڑایا> <گئے> <نقشے> <دے> <مطابق> <این> <دا>  
<.....> <پاکستانی> <نقشے> <وچ> <سرائیکی> <سندھی> <بلوچی> <گجراتی> <زبانیں> <شامل> <ہن> <7> <0>  
لیکن <آلے> <وسیم> <صدیقی> <دی> <گالہ> <کرینڈے> <بیٹھوں> <پاکستانی> <زبانیں> <دا> <نقشہ>  
اں <فرید> <سنیں> <دے> <روضے> <دی> <چھاں> <تلے> <رہ> <تے> <شاعری> <دیاں> <لکیراں> <دا>  
<اے> <خواجہ> <سنیں> <دی> <شاعری> <دا> <فیض> <تے> <برکت> <ہی> <ہے> <جو> <اج> <اسد>  
<سروے> <وچ> <مفرید> <سنیں> <تے> <انہاں> <دی> <شاعری> <دا> <کون> <سونہاں> <کانئی> <؟>  
<.....> <این> <تحقیق> <کون> <لینگویچ> <سروے> <آف> <انڈیا> <دا> <ناں> <ڈٹا> <گئے> <این> <لنگویچ>  
<متحدہ> <ہندستان> <وچ> <تقریباً> <188> <سال> <زبانیں> <دی> <تحقیق> <تے> <صرف> <کیتن> <.....>  
<یافتہ> <دے> <نال> <نال> <پی> <ایچ> <ڈی> <وی> <ہن> <بہوں> <وڈے> <محقق> <ہن> <جنہاں>  
<کھایا> <ونج> <سکدے۔> <این> <نقشے> <دی> <منظوری> <سر> <گریرسن> <ہن> <اپ> <اعلی> <تعلیم>  
ابق <این> <علاقے> <وچ> <بشمول> <سرائیکی> <اینڈے> <وچ> <تمام> <پاکستانی> <زبانیں> <کون> <ڈیکھایا>  
<ہن> <30 87ء> <وچ> <برٹش> <حکومت> <دے> <تعاون> <نال> <بڑایا> <گئے> <نقشے> <دے> <مط>  
<.....> <پاکستانی> <نقشے> <وچ> <سرائیکی> <سندھی> <بلوچی> <گجراتی> <زبانیں> <شامل>  
یاں <لکیراں> <لیکن> <آلے> <وسیم> <صدیقی



< > < دا > < کون > < سونہاں > < کاننی > < ؟ > < اے > < خواجہ > < سئیں > < دی > < شاعری > < دا > < فیض > < تے > < >  
< > < ناں > < ڈٹا > < گئے > < این > < لنگویچ > < سروے > < وچ > < مفرد > < سئیں > < تے > < انہاں > < دی > < شاعری >  
< > < تحقیق > < تے > < صرف > < کیتن > < .... > < این > < تحقیق > < کون > < لینگویچ > < سروے > < آف > < انڈیا > < دا >  
< > < بہوں > < وڈے > < محقق > < ہن > < جنہاں > < متحدہ > < ہندستان > < وچ > < تقریباً > < 10 > < سال > < زبانیں > < دی >  
< > < گریسن > < ہن > < اپ > < اعلیٰ > < تعلیم > < یافتہ > < دے > < نال > < نال > < پی > < ایچ > < ڈی > < وی > < ہن >  
< > < تمام > < پاکستانی > < زبانیں > < کون > < ڈیکھایا > < ونج > < سکدے۔ > < این > < نقشے > < دی > < منظوری > < سر >  
< > < نال > < بڑایا > < گئے > < نقشے > < دے > < مطابق > < این > < علاقے > < وچ > < بشمول > < سرائیکی > < ایندے > < وچ >  
< > < #NG # > < دا > < d > < زبانیں > < شامل > < ہن > < 31887 > < وچ > < برٹش > < حکومت > < دے > < تعاون > < >  
< > < #P # > < سندھی > < #N > < سرائیکی > < #N > < وچ > < #NG # > < نقشے > < #NG # > < پاکستانی > < .... > < پاکستانی >  
< > < وے > < کریندے > < سئیں > < دیاں > < الصوت > < تعلیم > < ہن > < > < #NG # > < گجراتی > < #N > < بلوچی > < >  
< > < برٹش > < وڈے > < اے > < لیکن > < ہن > < ہن > < نقشہ > < زبانیں > < ایچ > < بیٹھوں > < مفرد > < سر >  
< > < چہاں > < تعاون > < بشمول > < ہندستان > < اپ > < سر > < فرید > < تے > < ڈٹا > < سونہاں > < انڈیا > < >  
< > < دی > < تقریباً > < کاننی > < وسیم > < بڑایا > < پی > < نقشے > < ہے > < محقق > < لنگویچ > < حکومت >  
< > < صرف > < وچ > < لینگویچ > < گجراتی > < دا > < اعلیٰ > < گئے > < کون > < اسان > < وی > < بہوں > < >  
< > < یتن > < منظوری > < نال > < جو > < کون > < روضے > < ایندے > < تمام > < ہی > < برکت > < ڈی > < .... >  
< > < > < ء > < بلوچی > < سال > < مطابق > < ؟ > < دے > < ڈیکھایا > < سرائیکی > < سکدے۔ > < آلے > < 5 >  
< > < خواں > < فیض > < شامل > < 1887 > < صدیقی > < پاکستانی > < این > < شاعری > < جنہاں > < ناں > < یافتہ > < انہ >  
< > < جلی > < تلے > < رہ > < ائے > < لکیراں > < ونج > < گالہ > < تحقیق > < گریسن > < اج > < متحدہ > < >  
< > < > < مفرد > < سروے > < کریندے > < سئیں > < دیاں > < الصوت > < تعلیم > < فیض > < شامل > < > < آف >  
< > < سونہاں > < انڈیا > < برٹش > < وڈے > < اے > < لیکن > < ہن > < ہن > < نقشہ > < زبانیں > < ایچ > < بیٹھوں >  
< > < لنگویچ > < حکومت > < چہاں > < تعاون > < بشمول > < ہندستان > < اپ > < سر > < فرید > < تے > < ڈٹا > < >  
< > < > < وی > < بہوں > < دی > < تقریباً > < کاننی > < وسیم > < بڑایا > < پی > < نقشے > < ہے > < محقق > < >  
< > < کت > < ڈی > < .... > < صرف > < وچ > < لینگویچ > < گجراتی > < دا > < اعلیٰ > < گئے > < کون > < اسان >  
< > < دے۔ > < آلے > < کیتن > < منظوری > < نال > < جو > < کون > < روضے > < ایندے > < تمام > < ہی > < بر >  
< > < انہاجہ > < سندھی > < 30 > < بلوچی > < سال > < مطابق > < ؟ > < دے > < ڈیکھایا > < سرائیکی > < سک >  
< > < آلے > < وسیم > < صدیقی > < دی > < گالہ > < کریندے > < بیٹھوں > < > < شاعری > < جنہاں > < ناں > < یافتہ >  
< > < فرید > < سئیں > < دے > < روضے > < دی > < چہاں > < تلے > < رہ > < تے > < شاعری > < دیاں > < لکیراں > < لیکن >  
< > < > < خواجہ > < سئیں > < دی > < شاعری > < دا > < فیض > < تے > < برکت > < ہی > < ہے > < جو > < اج > < اسان >  
< > < وے > < وچ > < مفرد > < سئیں > < تے > < انہاں > < دی > < شاعری > < دا > < کون > < سونہاں > < کاننی > < ؟ > < اے >  
< > < این > < تحقیق > < کون > < لینگویچ > < سروے > < آف > < انڈیا > < دا > < ناں > < ڈٹا > < گئے > < این > < لنگویچ > < سر >  
< > < > < ہندستان > < ن > < علاقے > < 1887 > < سال > < زبانیں > < دی > < تحقیق > < تے > < صرف > < کیتن > < .... > < >  
< > < دے > < نال > < نال > < نال > < پی > < ایچ > < ڈی > < وی > < ہن > < محقق > < ہن > < جنہاں > < متحدہ >  
< > < ونج > < سکدے۔ > < این > < نقشے > < دی > < منظوری > < سر > < گریسن > < ہن > < اپ > < اعلیٰ > < تعلیم > < یافتہ >  
< > < این > < علاقے > < وچ > < بشمول > < سرائیکی > < ایندے > < وچ > < تمام > < پاکستانی > < زبانیں > < کون > < ڈیکھایا > < >  
< > < 30 > < وچ > < برٹش > < حکومت > < دے > < تعاون > < نال > < بڑایا > < گئے > < نقشے > < دے > < مطابق > < >  
< > < > < تقریباً > < 1887 > < صدیقی > < پاکستانی > < این > < سندھی > < بلوچی > < گجراتی > < زبانیں > < وچ > < > < سندھی >  
< > < لی > < تلے > < رہ > < ائے > < لکیراں > < ونج > < گالہ > < تحقیق > < گریسن > < اج > < متحدہ > < خواجہ >  
< > < د



پاکستانی < زبانیں > < کون > < ڈیکھایا > < ونج > < سکدے > < این > < نقشے > < دی >< منظوری > < سر > < گریسن >  
< گئے > < نقشے > < دے > < مطابق > < این > < علاقے > < وچ > < بشمول > < سرائیکی > < ایندے > < وچ > < تمام > < >  
< گجراتی > < زبانیں > < شہ > < مل > < هن > < 30ء > < وچ > < برٹش > < حکومت > < دے > < تعاون > < نال > < بڑایا  
ٹھوں > < > < پاکستانی > < زبانیں > < دا > < وچ > < .... > < پاکستانی > < نقشے > < وچ > < سرائیکی > < سندھی > < بلوچی  
< رہ > < تے > < شاعری > < دیاں > < لکیراں > < لیکن > < آلے > < وسیم > < صدیقی > < دی > < گالھ > < کریندے > < بی  
< برکت > < ہی > < ہے > < جو > < اج > < اساں > < فرید > < سئیں > < دے > < روضے > < دی > < چھاں > < تلے >  
عری < دا > < کون > < سونہاں > < کاٹی > < ؟ > < اے > < خواجہ > < سئیں > < دی > < شاعری > < دا > < فیض > < تے  
< دا > < ناں > < ڈتا > < گئے > < این > < لنگویچ > < سروے > < وچ > < مفرد > < سئیں > < تے > < انہاں > < دی > < شا  
< دی > < تحقیق > < تے > < صرف > < کیتن > < .... > < این > < تحقیق > < کون > < لینگویچ > < سروے > < آف > < انڈیا >  
< ن > < بہوں > < وڈے > < محقق > < ہن > < جنہاں > < متحدہ > < ہندستان > < وچ > نام تقریباً < 1887 > < سال > < زبانیں >  
< ر > < گریسن > < ہن > < اپ > < اعلیٰ > < تعلیم > < یافتہ > < دے > < نال > < نال > < پی > < ایچ > < ڈی > < وی > < ہ  
< وچ > < تمام > < پاکستانی > < زبانیں > < کون > < ڈیکھایا > < ونج > < سکدے۔ > < این > < نقشے > < دی > < منظوری > < سد  
< نال > < بڑایا > < گئے > < نقشے > < دے > < مطابق > < این > < علاقے > < وچ > < بشمول > < سرائیکی > < ایندے > < سد  
سندھی > < بلوچی > < گجراتی > < زبانیں > < شا > < دل > < هن > < 30ء > < وچ > < برٹش > < حکومت > < دے > < تعاون >  
کریندے > < بیٹھوں > < > < پاکستانی > < زبانیں > < دا > < نقشے > < .... > < پاکستانی > < نقشے > < وچ > < سرائیکی > < سد  
چھاں > < تلے > < رہ > < تے > < شاعری > < دیاں > < لکیراں > < لیکن > < آلے > < وسیم > < صدیقی > < دی > < گالھ > < سد  
< فیض > < تے > < برکت > < ہی > < ہے > < جو > < اج > < اساں > < فرید > < سئیں > < دے > < روضے > < دی > < سد  
< دی > < شاعری > < دا > < کون > < سونہاں > < کاٹی > < ؟ > < اے > < خواجہ > < سئیں > < دی > < شاعری > < دا >  
< آف > < انڈیا > < دا > < ناں > < ڈتا > < گئے > < این > < لنگویچ > < سروے > < وچ > < مفرد > < سئیں > < تے > < انہاں  
ال > < زبانیں > < دی > < تحقیق > < تے > < صرف > < کیتن > < .... > < این > < تحقیق > < کون > < لینگویچ > < سروے >  
< وی > < ہن > < بہوں > < وڈے > < محقق > < ہن > < جنہاں > < متحدہ > < ہندستان > < وچ > < مل تقریباً > < 1887 > < سد  
منظوری > < سر > < گریسن > < ہن > < اپ > < اعلیٰ > < تعلیم > < یافتہ > < دے > < نال > < نال > < پی > < ایچ > < ڈی  
< ایندے > < وچ > < تمام > < پاکستانی > < زبانیں > < کون > < ڈیکھایا > < ونج > < سکدے۔ > < این > < نقشے > < دی > < سد  
< دے > < تعاون > < نال > < بڑایا > < گئے > < نقشے > < دے > < مطابق > < این > < علاقے > < وچ > < بشمول > < سرائیکی  
< سرائیکی > < سندھی > < بلوچی > < گجراتی > < زبانیں > < شام > < تہ > < هن > < 30ء > < وچ > < برٹش > < حکومت > < سد  
< گالھ > < کریندے > < بیٹھوں > < > < پاکستانی > < زبانیں > < دا > < پاکستانی > < نقشے > < وچ >  
< دی > < چھاں > < تلے > < رہ > < تے > < شاعری > < دیاں > < لکیراں > < لیکن > < آلے > < وسیم > < صدیقی > < دی  
اعری > < دا > < فیض > < تے > < برکت > < ہی > < ہے > < جو > < اج > < اساں > < فرید > < سئیں > < دے > < روضے  
< تے > < انہاں > < دی > < شاعری > < دا > < کون > < سونہاں > < کاٹی > < ؟ > < اے > < خواجہ > < سئیں > < دی > < شا  
< سروے > < آف > < انڈیا > < دا > < ناں > < ڈتا > < گئے > < این > < لنگویچ > < سروے > < وچ > < مفرد > < سئیں  
< 1887 > < سال > < زبانیں > < دی > < تحقیق > < تے > < صرف > < کیتن > < .... > < این > < تحقیق > < کون > < لینگویچ  
< ایچ > < ڈی > < وی > < ہن > < بہوں > < وڈے > < محقق > < ہن > < جنہاں > < متحدہ > < ہندستان > < وچ > < مل تقریباً  
< دی > < منظوری > < سر > < گریسن > < ہن > < اپ > < اعلیٰ > < تعلیم > < یافتہ > < دے > < نال > < نال > < پی  
< سرائیکی > < ایندے > < وچ > < تمام > < پاکستانی > < زبانیں > < کون > < ڈیکھایا > < ونج > < سکدے۔ > < این > < نقشے  
حکومت > < دے > < تعاون > < نال > < بڑایا > < گئے > < نقشے > < دے > < مطابق > < این > < علاقے > < وچ > < بشمول  
< > < وچ > < سرائیکی > < سندھی > < بلوچی > < گجراتی > < زبانیں > < شامل > < تنقہ > < هن > < 30ء > < وچ > < برٹش  
< صدیقی > < دی > < گالھ > < کریندے > < بیٹھوں > < > < پاکستانی > < زبانیں > < دا > < .... > < .... > < پاکستانی > < نقد  
< دے > < روضے > < دی > < چھاں > < تلے > < رہ > < تے > < شاعری > < دیاں > < لکیراں > < لیکن > < آلے > < وسیم  
ئیں > < دی > < شاعری > < دا > < فیض > < تے > < برکت > < ہی > < ہے > < جو > < اج > < اساں > < فرید > < سئیں  
مفر



این < علاقے < وچ < بشمول < سرائیکی < ایندے < وچ < تمام < پاکستانی < زبانیں < کون < ڈیکھایا <  
 ن < 30ء < وچ < برٹش < حکومت < دے < تعاون < نال < بڑایا < گئے < نقشے < دے < مطابق < <  
 < دا < ..... < پاکستانی < نقشے < وچ < سرائیکی < سندھی < بلوچی < گجراتی < زبانیں < شامل < تقریب < ہ  
 لکیراں < لیکن < آلے < وسیم < صدیقی < دی < گالھ < کریندے < بیٹھوں < < < پاکستانی < زبانیں < دا  
 < اج < اساں < فرید < سئیں < دے < روضے < دی < چھاں < تلے < رہ < تے < شاعری < دیاں < <  
 ائی < ؟ < اے < خواجہ < سئیں < دی < شاعری < دا < فیض < تے < برکت < ہی < ہے < جو <  
 < لنگویچ < سروے < وچ < مفرد < سئیں < تے < انہاں < دی < شاعری < دا < کون < سونہاں < <  
 < کیتن < ..... < این < تحقیق < کون < لنگویچ < سروے < آف < انڈیا < دا < ناں < ڈٹا < گئے < این  
 < جنہاں < متحدہ < ہندستان < وچ < تبا < 1887 < سال < زبانیں < دی < تحقیق < تے < صرف <  
 < تعلیم < یافتہ < دے < نال < نال < پی < ایچ < ڈی < وی < ہن < بہوں < وڈے < محقق < ہن  
 کون < ڈیکھایا < ونج < سکدے۔ < این < نقشے < دی < منظوری < سر < گریسن < ہن < اپ < اعلیٰ  
 دے < مطابق < این < علاقے < وچ < بشمول < سرائیکی < ایندے < وچ < تمام < پاکستانی < زبانیں < <  
 < شامل < قریب < ہن < 30ء < وچ < برٹش < حکومت < دے < تعاون < نال < بڑایا < گئے < نقشے < <  
 < زبانیں < دا < زبانیں < ..... < پاکستانی < نقشے < وچ < سرائیکی < سندھی < بلوچی < گجراتی < زبانیں  
 < شاعری < دیاں < لکیراں < لیکن < آلے < وسیم < صدیقی < دی < گالھ < کریندے < بیٹھوں < <  
 < ہی < ہے < جو < اج < اساں < فرید < سئیں < دے < روضے < دی < چھاں < تلے < رہ < تے <  
 ا < کون < سونہاں < کائی < ؟ < اے < خواجہ < سئیں < دی < شاعری < دا < فیض < تے < برکت  
 اں < ڈٹا < گئے < این < لنگویچ < سروے < وچ < مفرد < سئیں < تے < انہاں < دی < شاعری < د  
 تحقیق < تے < صرف < کیتن < ..... < این < تحقیق < کون < لنگویچ < سروے < آف < انڈیا < دا < ن  
 < وڈے < محقق < ہن < جنہاں < متحدہ < ہندستان < وچ < تق < 1887 < سال < زبانیں < دی <  
 سن < ہن < اپ < اعلیٰ < تعلیم < یافتہ < دے < نال < نال < پی < ایچ < ڈی < وی < ہن < بہوں  
 < پاکستانی < زبانیں < کون < ڈیکھایا < ونج < سکدے۔ < این < نقشے < دی < منظوری < سر < گریسن  
 بڑایا < گئے < نقشے < دے < مطابق < این < علاقے < وچ < بشمول < سرائیکی < ایندے < وچ < تمام  
 < 1887 زبانیں < شامل < ریبا ہن < 30ء < وچ < برٹش < حکومت < دے < تعاون < نال < <
