# Supplementary material for: Mixed Script Identification Using Automated DNN Hyperparameter Optimization
Source: Hindawi journal article supplement (doi:10.1155/2021/8415333), 2021-01-01
Supplement: f1 [file 8415333.f1.zip]

#NG #نشے > #N #پاکستانی > ---- > پاکستانی > #NG #گجراتی > #N بلوچی > #P #سندھی > #N سرائیکی > #N وچ > #بیتھوں > مفرد > سروے > کریندے > سٹیں > دیاں > الصّوت > تعلیم > فیض > شامل > << > >  
< > سونہاں > انڈیا > برٹش > وڈے > اے > لیکن > ہن > هن > نقشہ > زبانیں > ایچ > >  
< > لنگویچ > حکومت > چھاں > تعاون > بشمول > ہندستان > اپ > سر > فرید > تے > ڈتا  
اساں > وی > بہوں > دی > تقریباً > کائی > وسیم > بڑایا > پی > نقشے > ہے > > محقق  
> برکت > ڈی > ---- > صرف > وچ > لینگویچ > گجراتی > دا > اعلیٰ > گئے > کوں > >  
> سکدے۔ > آلے > کیتن > منظوری > نال > جو > کون > روضے > ایندے > تمام > ہی  
یافتہ > انہاں > سنہ > #P #Sa ء > بلوچی > سال > مطابق > ؟ > دے > ڈیکھایا > سرائیکی  
> لیکن > آلے > وسیم > صدیقی > دی > گالھ > کریندے > بیتھوں > شاعری > جنھاں > ناں > >  
اساں > فرید > سٹیں > دے > روضے > دی > چھاں > تلے > رہ > تے > شاعری > دیاں > لکیراں  
< > اے > خواجہ > سٹیں > دی > شاعری > دا > فیض > تے > برکت > ہی > ہے > جو > اج > >  
< > سروے > وچ > مفرد > سٹیں > تے > انہاں > دی > شاعری > دا > کون > سونہاں > کائی > ؟  
---- > این > تحقیق > کوں > لینگویچ > سروے > آف > انڈیا > دا > ناں > ڈتا > گئے > این > لینگویچ  
< > متحدہ > ہندستان > وچ > تقریظ زبانیں 1887 > سال > زبانیں > دی > تحقیق > تے > صرف > کیتن > >  
< > یافتہ > دے > نال > نال > پی > ایچ > ڈی > وی > هن > بہوں > وڈے > محقق > هن > جنھاں  
ڈیکھایا > ونج > سکدے۔ > این > نقشے > دی > منظوری > سر > گریرسن > هن > اپ > اعلیٰ > تعلیم  
مطابق > این > علاقے > وچ > بشمول > سرائیکی > ایندے > وچ > تمام > پاکستانی > زبانیں > کوں > >  
مل > بیباکی > 30ء > وچ > برٹش > حکومت > دے > تعاون > نال > بڑایا > گئے > نقشے > دے > >  
> خواجہ > علاقہ > 1887 > صدیقی > پاکستانی > این > سندھی > بلوچی > گجراتی > زبانیں > شا  
< > جلی > تلے > رہ > ائے > لکیراں > ونج > گالھ > تحقیق > گریرسن > اج > متحدہ  
> شاعری > دیاں > لکیراں > لیکن > آلے > وسیم > صدیقی > دی > گالھ > کریندے > بیتھوں > آف  
ہی > ہے > جو > اج > اساں > فرید > سٹیں > دے > روضے > دی > چھاں > تلے > رہ > تے  
کون > سونہاں > کائی > ؟ > اے > خواجہ > سٹیں > دی > شاعری > دا > فیض > تے > برکت > >  
> ڈتا > گئے > این > لینگویچ > سروے > وچ > مفرد > سٹیں > تے > انہاں > دی > شاعری > دا > >  
< > تے > صرف > کیتن > ---- > این > تحقیق > کوں > لینگویچ > سروے > آف > انڈیا > دا > ناں  
< > محقق > هن > جنھاں > متحدہ > ہندستان > وچ > تقریبیہ ن > 30 > سال > زبانیں > دی > تحقیق  
هن > اپ > اعلیٰ > تعلیم > یافتہ > دے > نال > نال > پی > ایچ > ڈی > وی > هن > بہوں > وڈ  
ستانی > زبانیں > کوں > ڈیکھایا > ونج > سکدے۔ > این > نقشے > دی > منظوری > سر > گریرسن  
> گئے > نقشے > دے > مطابق > این > علاقے > وچ > بشمول > سرائیکی > ایندے > وچ > تمام > پاک  
> گجراتی > زبانیں > شامل > ہا > 30ء > وچ > برٹش > حکومت > دے > تعاون > نال > بڑایا  
< > پاکستانی > زبانیں > دا > سرائیکی > ---- > پاکستانی > نقشے > وچ > سرائیکی > سندھی > بلوچی  
ہ > تے > شاعری > دیاں > لکیراں > لیکن > آلے > وسیم > صدیقی > دی > گالھ > کریندے > بیتھوں  
> برکت > ہی > ہے > جو > اج > اساں > فرید > سٹیں > دے > روضے > دی > چھاں > تلے > ر  
< > دا > کون > سونہاں > کائی > ؟ > اے > خواجہ > سٹیں > دی > شاعری > دا > فیض > تے  
ا > ناں > ڈتا > گئے > این > لینگویچ > سروے > وچ > مفرد > سٹیں > تے > انہاں > دی > شاعری  
< > تحقیق > تے > صرف > کیتن > ---- > این > تحقیق > کوں > لینگویچ > سروے > آف > انڈیا > د  
بہوں > وڈے > محقق > هن > جنھاں > متحدہ > ہندستان > وچ > تقریبان 1887 > سال > زبانیں > دی  
گریرسن > هن > اپ > اعلیٰ > تعلیم > یافتہ > دے > نال > نال > پی > ایچ > ڈی > وی > هن > >  
> تمام > پاکستانی > زبانیں > کوں > ڈیکھایا > ونج > سکدے۔ > این > نقشے > دی > منظوری > سر  
< > بڑایا > گئے > نقشے > دے > مطابق > این > علاقے > وچ > بشمول > سرائیکی > ایندے > وچ  
ی > بلوچی > گجراتی > زبانیں > شامل > ه > 30ء > وچ > برٹش > حکومت > دے > تعاون > نال  
ریندے > بیتھوں > > پاکستانی > زبانیں > دا > وچ > ---- > پاکستانی > نقشے > وچ > سرائیکی > سندھ  
اں > تلے > رہ > تے > شاعری > دیاں > لکیراں > لیکن > آلے > وسیم > صدیقی > دی > گالھ > ک  
فیض > تے > برکت > ہی > ہے > جو > اج > اساں > فرید > سٹیں > دے > روضے > دی > چھ  
> دی > شاعری > دا > کون > سونہاں > کائی > ؟ > اے > خواجہ > سٹیں > دی > شاعری > دا > >  
< > ف > انڈیا > دا > ناں > ڈتا > گئے > این > لینگویچ > سروے > وچ > مفرد > سٹیں > تے > انہاں  
< > زبانیں > دی > تحقیق > تے > صرف > کیتن > ---- > این > تحقیق > کوں > لینگویچ > سروے > آ  
> وی > هن > بہوں > وڈے > محقق > هن > جنھاں > متحدہ > ہندستان > وچ > تقریبان 1887 > سال  
منظوری > سر > گریرسن > هن > اپ > اعلیٰ > تعلیم > یافتہ > دے > نال > نال > پی > ایچ > ڈی  
> ایندے > وچ > تمام > پاکستانی > زبانیں > کوں > ڈیکھایا > ونج > سکدے۔ > این > نقشے > دی > م  
< > تعاون > نال > بڑایا > گئے > نقشے > دے > مطابق > این > علاقے > وچ > بشمول > سرائیکی  
سرائیکی > سندھی > بلوچی > گجراتی > زبانیں > شامل > هن > 30ء > وچ > برٹش > حکومت > دے  
< > گالھ > کریندے > بیتھوں > > پاکستانی > زبانیں > دا > نقشے > ---- > پاکستانی > نقشے > وچ  
< > دی > چھاں > تلے > رہ > تے > شاعری > دیاں > لکیراں > لیکن > آلے > وسیم > صدیقی > دی

اعری > <دا> <فیض> <تے> <برکت> <ہی> <ہے> <جو> <اج> <اساں> <فرید> <سنیں> <دے> <روضے>  
<تے> <انہاں> <دی> <شاعری> <دا> <کون> <سونہاں> <کانئی> <؟> <اے> <خواجہ> <سنیں> <دی> <شد>  
<سروے> <آف> <انڈیا> <دا> <ناں> <ڈٹا> <گئے> <این> <لنگویچ> <سروے> <وچ> <مفرید> <سنیں>  
1887 <سال> <زبانیں> <دی> <تحقیق> <تے> <صرف> <کیتن> <۔۔۔۔> <این> <تحقیق> <کون> <لینگویچ>  
<ایچ> <ڈی> <وی> <ہن> <بہوں> <وڈے> <محقق> <ہن> <جنہاں> <متحدہ> <ہندستان> <وچ> <تقریباً>  
<دی> <منظوری> <سر> <گریرسن> <ہن> <اپ> <اعلی> <تعلیم> <یافتہ> <دے> <نال> <نال> <پی>  
<سرائیکی> <اینڈے> <وچ> <تمام> <پاکستانی> <زبانیں> <کون> <ڈیکھایا> <ونج> <سکدے۔> <این> <نقشے>  
<حکومت> <دے> <تعاون> <نال> <بڑایا> <گئے> <نقشے> <دے> <مطابق> <این> <علاقے> <وچ> <بشمول>  
<وچ> <سرائیکی> <سندھی> <بلوچی> <گجراتی> <زبانیں> <شامل> <ہن> <30ء> <وچ> <برٹش> <دیبی>  
<دی> <گالھ> <کرینڈے> <بیٹھوں> <پاکستانی> <زبانیں> <دا> <پاکستانی> <۔۔۔۔> <پاکستانی> <نقشہ>  
<روضے> <دی> <چھاں> <تلے> <رہ> <تے> <شاعری> <دیاں> <لکیراں> <لیکن> <آلے> <وسیم> <صد>  
<دی> <شاعری> <دا> <فیض> <تے> <برکت> <ہی> <ہے> <جو> <اج> <اساں> <فرید> <سنیں> <دے>  
<سنیں> <تے> <انہاں> <دی> <شاعری> <دا> <کون> <سونہاں> <کانئی> <؟> <اے> <خواجہ> <سنیں>  
<لینگویچ> <سروے> <آف> <انڈیا> <دا> <ناں> <ڈٹا> <گئے> <این> <لنگویچ> <سروے> <وچ> <مفرید>  
<تقریباً> <1887> <سال> <زبانیں> <دی> <تحقیق> <تے> <صرف> <کیتن> <۔۔۔۔> <این> <تحقیق> <کون>  
ل <پی> <ایچ> <ڈی> <وی> <ہن> <بہوں> <وڈے> <محقق> <ہن> <جنہاں> <متحدہ> <ہندستان> <وچ>  
این <نقشے> <دی> <منظوری> <سر> <گریرسن> <ہن> <اپ> <اعلی> <تعلیم> <یافتہ> <دے> <نال> <نا>  
<بشمول> <سرائیکی> <اینڈے> <وچ> <تمام> <پاکستانی> <زبانیں> <کون> <ڈیکھایا> <ونج> <سکدے۔> <دا>  
<برٹش> <حکومت> <دے> <تعاون> <نال> <بڑایا> <گئے> <نقشے> <دے> <مطابق> <این> <علاقے> <وچ>  
ثانی <نقشے> <وچ> <سرائیکی> <سندھی> <بلوچی> <گجراتی> <زبانیں> <شامل> <ہن> <30ء> <وچ>  
<وسیم> <صدیقی> <دی> <گالھ> <کرینڈے> <بیٹھوں> <پاکستانی> <زبانیں> <دا> <۔۔۔۔> <۔۔۔۔> <پاکد>  
<سنیں> <دے> <روضے> <دی> <چھاں> <تلے> <رہ> <تے> <شاعری> <دیاں> <لکیراں> <لیکن> <آلے>  
اجہ <سنیں> <دی> <شاعری> <دا> <فیض> <تے> <برکت> <ہی> <ہے> <جو> <اج> <اساں> <فرید>  
<وچ> <مفرید> <سنیں> <تے> <انہاں> <دی> <شاعری> <دا> <کون> <سونہاں> <کانئی> <؟> <اے> <خو>  
تحقیق <کون> <لینگویچ> <سروے> <آف> <انڈیا> <دا> <ناں> <ڈٹا> <گئے> <این> <لنگویچ> <سروے> <دا>  
ہندستان <وچ> <تقریباً> <1887> <سال> <زبانیں> <دی> <تحقیق> <تے> <صرف> <کیتن> <۔۔۔۔> <این> <دا>  
<نال> <نال> <پی> <ایچ> <ڈی> <وی> <ہن> <بہوں> <وڈے> <محقق> <ہن> <جنہاں> <متحدہ> <دا>  
<سکدے۔> <این> <نقشے> <دی> <منظوری> <سر> <گریرسن> <ہن> <اپ> <اعلی> <تعلیم> <یافتہ> <دے>  
<علاقے> <وچ> <بشمول> <سرائیکی> <اینڈے> <وچ> <تمام> <پاکستانی> <زبانیں> <کون> <ڈیکھایا> <ونج>  
3 <وچ> <برٹش> <حکومت> <دے> <تعاون> <نال> <بڑایا> <گئے> <نقشے> <دے> <مطابق> <این> <دا>  
<۔۔۔۔> <پاکستانی> <نقشے> <وچ> <سرائیکی> <سندھی> <بلوچی> <گجراتی> <زبانیں> <شامل> <ہن> <7> <0>  
لیکن <آلے> <وسیم> <صدیقی> <دی> <گالھ> <کرینڈے> <بیٹھوں> <پاکستانی> <زبانیں> <دا> <نقشہ>  
اں <فرید> <سنیں> <دے> <روضے> <دی> <چھاں> <تلے> <رہ> <تے> <شاعری> <دیاں> <لکیراں> <دا>  
<اے> <خواجہ> <سنیں> <دی> <شاعری> <دا> <فیض> <تے> <برکت> <ہی> <ہے> <جو> <اج> <اسد>  
<سروے> <وچ> <مفرید> <سنیں> <تے> <انہاں> <دی> <شاعری> <دا> <کون> <سونہاں> <کانئی> <؟>  
<۔> <این> <تحقیق> <کون> <لینگویچ> <سروے> <آف> <انڈیا> <دا> <ناں> <ڈٹا> <گئے> <این> <لنگویچ>  
<متحدہ> <ہندستان> <وچ> <تقریباً> <188> <سال> <زبانیں> <دی> <تحقیق> <تے> <صرف> <کیتن> <۔۔۔۔>  
<یافتہ> <دے> <نال> <نال> <پی> <ایچ> <ڈی> <وی> <ہن> <بہوں> <وڈے> <محقق> <ہن> <جنہاں>  
<کھایا> <ونج> <سکدے۔> <این> <نقشے> <دی> <منظوری> <سر> <گریرسن> <ہن> <اپ> <اعلی> <تعلیم>  
ابق <این> <علاقے> <وچ> <بشمول> <سرائیکی> <اینڈے> <وچ> <تمام> <پاکستانی> <زبانیں> <کون> <ڈیکھایا>  
<ہن> <30 87ء> <وچ> <برٹش> <حکومت> <دے> <تعاون> <نال> <بڑایا> <گئے> <نقشے> <دے> <مط>  
<دا> <دا> <۔۔۔۔> <پاکستانی> <نقشے> <وچ> <سرائیکی> <سندھی> <بلوچی> <گجراتی> <زبانیں> <

< > < دا > < کون > < سونہاں > < کاننی > < ؟ > < اے > < خواجہ > < سئیں > < دی > < شاعری > < دا > < فیض > < تے > < >  
< > < ناں > < ڈٹا > < گئے > < این > < لنگویچ > < سروے > < وچ > < مفرد > < سئیں > < تے > < انہاں > < دی > < شاعری >  
< > < تحقیق > < تے > < صرف > < کیتن > < .... > < این > < تحقیق > < کون > < لینگویچ > < سروے > < آف > < انڈیا > < دا >  
< > < بہوں > < وڈے > < محقق > < ہن > < جنہاں > < متحدہ > < ہندستان > < وچ > < تقریباً > < 10 > < سال > < زبانیں > < دی >  
< > < گریرسن > < ہن > < اپ > < اعلیٰ > < تعلیم > < یافتہ > < دے > < نال > < نال > < پی > < ایچ > < ڈی > < وی > < ہن >  
< > < تمام > < پاکستانی > < زبانیں > < کون > < ڈیکھایا > < ونج > < سکدے۔ > < این > < نقشے > < دی > < منظوری > < سر >  
< > < نال > < بڑایا > < گئے > < نقشے > < دے > < مطابق > < این > < علاقے > < وچ > < بشمول > < سرائیکی > < ایندے > < وچ >  
< > < #NG # > < دا > < d > < زبانیں > < شامل > < ہن > < 31887 > < وچ > < برٹش > < حکومت > < دے > < تعاون > < >  
< > < #P # > < سندھی > < #N > < سرائیکی > < #N > < وچ > < #NG # > < نقشے > < #NG # > < پاکستانی > < .... > < پاکستانی >  
< > < وے > < کریندے > < سئیں > < دیاں > < الصوت > < تعلیم > < ہن > < > < #NG # > < گجراتی > < #N > < بلوچی > < >  
< > < برٹش > < وڈے > < اے > < لیکن > < ہن > < ہن > < نقشہ > < زبانیں > < ایچ > < بیٹھوں > < مفرد > < سر >  
< > < چہاں > < تعاون > < بشمول > < ہندستان > < اپ > < سر > < فرید > < تے > < ڈٹا > < سونہاں > < انڈیا > < >  
< > < دی > < تقریباً > < کاننی > < وسیم > < بڑایا > < پی > < نقشے > < ہے > < محقق > < لنگویچ > < حکومت >  
< > < صرف > < وچ > < لینگویچ > < گجراتی > < دا > < اعلیٰ > < گئے > < کون > < اسان > < وی > < بہوں > < >  
< > < یتن > < منظوری > < نال > < جو > < کون > < روضے > < ایندے > < تمام > < ہی > < برکت > < ڈی > < .... >  
< > < > < ء > < بلوچی > < سال > < مطابق > < ؟ > < دے > < ڈیکھایا > < سرائیکی > < سکدے۔ > < آلے > < 5 >  
< > < خواں > < فیض > < شامل > < 1887 > < صدیقی > < پاکستانی > < این > < شاعری > < جنہاں > < ناں > < یافتہ > < انہ >  
< > < جلی > < تلے > < رہ > < ائے > < لکیراں > < ونج > < گالہ > < تحقیق > < گریرسن > < اج > < متحدہ > < >  
< > < > < مفرد > < سروے > < کریندے > < سئیں > < دیاں > < الصوت > < تعلیم > < فیض > < شامل > < > < آف >  
< > < سونہاں > < انڈیا > < برٹش > < وڈے > < اے > < لیکن > < ہن > < ہن > < نقشہ > < زبانیں > < ایچ > < بیٹھوں >  
< > < لنگویچ > < حکومت > < چہاں > < تعاون > < بشمول > < ہندستان > < اپ > < سر > < فرید > < تے > < ڈٹا > < >  
< > < > < وی > < بہوں > < دی > < تقریباً > < کاننی > < وسیم > < بڑایا > < پی > < نقشے > < ہے > < محقق > < >  
< > < کت > < ڈی > < .... > < صرف > < وچ > < لینگویچ > < گجراتی > < دا > < اعلیٰ > < گئے > < کون > < اسان >  
< > < دے۔ > < آلے > < کیتن > < منظوری > < نال > < جو > < کون > < روضے > < ایندے > < تمام > < ہی > < بر >  
< > < انہاجہ > < سندھی > < 30 > < بلوچی > < سال > < مطابق > < ؟ > < دے > < ڈیکھایا > < سرائیکی > < سک >  
< > < آلے > < وسیم > < صدیقی > < دی > < گالہ > < کریندے > < بیٹھوں > < > < شاعری > < جنہاں > < ناں > < یافتہ >  
< > < فرید > < سئیں > < دے > < روضے > < دی > < چہاں > < تلے > < رہ > < تے > < شاعری > < دیاں > < لکیراں > < لیکن >  
< > < > < خواجہ > < سئیں > < دی > < شاعری > < دا > < فیض > < تے > < برکت > < ہی > < ہے > < جو > < اج > < اسان >  
< > < وے > < وچ > < مفرد > < سئیں > < تے > < انہاں > < دی > < شاعری > < دا > < کون > < سونہاں > < کاننی > < ؟ > < اے >  
< > < این > < تحقیق > < کون > < لینگویچ > < سروے > < آف > < انڈیا > < دا > < ناں > < ڈٹا > < گئے > < این > < لنگویچ > < سر >  
< > < > < ہندستان > < ن > < علاقے > < 1887 > < سال > < زبانیں > < دی > < تحقیق > < تے > < صرف > < کیتن > < .... > < >  
< > < دے > < نال > < نال > < نال > < پی > < ایچ > < ڈی > < وی > < ہن > < محقق > < ہن > < جنہاں > < متحدہ >  
< > < ونج > < سکدے۔ > < این > < نقشے > < دی > < منظوری > < سر > < گریرسن > < ہن > < اپ > < اعلیٰ > < تعلیم > < یافتہ >  
< > < این > < علاقے > < وچ > < بشمول > < سرائیکی > < ایندے > < وچ > < تمام > < پاکستانی > < زبانیں > < کون > < ڈیکھایا > < >  
< > < 30 > < وچ > < برٹش > < حکومت > < دے > < تعاون > < نال > < بڑایا > < گئے > < نقشے > < دے > < مطابق > < >  
< > < > < تقریباً > < 1887 > < صدیقی > < پاکستانی > < این > < سندھی > < بلوچی > < گجراتی > < زبانیں > < وچ > < سندھی >  
< > < لی > < تلے > < رہ > < ائے > < لکیراں > < ونج > < گالہ > < تحقیق > < گریرسن > < اج > < متحدہ > < خواجہ >  
< > < دیاں

پاکستانی < زبانیں > کون < ڈیکھایا > ونج < سکدے > این < نقشے > دی <> منظوری < سر > گریسن  
 < گئے > نقشے < دے > مطابق < این > علاقے < وچ > بشمول < سرائیکی > اینڈے < وچ > تمام <  
 < گجراتی > زبانیں < شہ > مل < هن > 30ء < وچ > برٹش < حکومت > دے < تعاون > نال < بڑایا  
 ٹھوں < پاکستانی > زبانیں < دا > وچ < ..... > پاکستانی < نقشے > وچ < سرائیکی > سندھی < بلوچی  
 رہ < تے > شاعری < دیاں > لکیراں < لیکن > آلے < وسیم > صدیقی < دی > گالھ < کریندے > بی  
 < برکت > ہی < ہے > جو < اج > اسان < فرید > سئیں < دے > روضے < دی > چھاں < تلے >  
 عری < دا > کون < سونہاں > کاٹی < ؟ > اے < خواجہ > سئیں < دی > شاعری < دا > فیض < تے  
 < ناں > ڈتا < گئے > این < لنگویچ > سروے < وچ > مفرد < سئیں > تے < انہاں > دی < شا  
 دی < تحقیق > تے < صرف > کیتن < ..... > این < تحقیق > کون < لینگویچ > سروے < آف > انڈیا  
 ن < بہوں > وڈے < محقق > ہن < جنہاں > متحدہ < ہندستان > وچ < تقریباً > 1887 < سال > زبانیں <  
 ر < گریسن > ہن < اپ > اعلیٰ < تعلیم > یافتہ < دے > نال < نال > پی < ایچ > ڈی < وی > ہ  
 وچ < تمام > پاکستانی < زبانیں > کون < ڈیکھایا > ونج < سکدے۔ > این < نقشے > دی < منظوری > سد  
 نال < بڑایا > گئے < نقشے > دے < مطابق > این < علاقے > وچ < بشمول > سرائیکی < اینڈے >  
 سندھی < بلوچی > گجراتی < زبانیں > شا < دل > هن < 30ء > وچ < برٹش > حکومت < دے > تعاون  
 کریندے < بیٹھوں > < پاکستانی > زبانیں < دا > نقشے < ..... > پاکستانی < نقشے > وچ < سرائیکی >  
 چھاں < تلے > رہ < تے > شاعری < دیاں > لکیراں < لیکن > آلے < وسیم > صدیقی < دی > گالھ <  
 فیض > تے < برکت > ہی < ہے > جو < اج > اسان < فرید > سئیں < دے > روضے < دی >  
 < دی > شاعری < دا > کون < سونہاں > کاٹی < ؟ > اے < خواجہ > سئیں < دی > شاعری < دا >  
 < آف > انڈیا < دا > ناں < ڈتا > گئے < این > لنگویچ < سروے > وچ < مفرد > سئیں < تے > انہاں  
 ال < زبانیں > دی < تحقیق > تے < صرف > کیتن < ..... > این < تحقیق > کون < لینگویچ > سروے  
 < وی > ہن < بہوں > وڈے < محقق > ہن < جنہاں > متحدہ < ہندستان > وچ < مل تقریباً > 1887 <  
 منظوری < سر > گریسن < ہن > اپ < اعلیٰ > تعلیم < یافتہ > دے < نال > نال < پی > ایچ < ڈی  
 < اینڈے > وچ < تمام > پاکستانی < زبانیں > کون < ڈیکھایا > ونج < سکدے۔ > این < نقشے > دی >  
 دے < تعاون > نال < بڑایا > گئے < نقشے > دے < مطابق > این < علاقے > وچ < بشمول > سرائیکی  
 < سرائیکی > سندھی < بلوچی > گجراتی < زبانیں > شام < تہ > هن < 30ء > وچ < برٹش > حکومت  
 < گالھ > کریندے < بیٹھوں > < پاکستانی > زبانیں < دا > ..... < پاکستانی > نقشے < وچ >  
 < دی > چھاں < تلے > رہ < تے > شاعری < دیاں > لکیراں < لیکن > آلے < وسیم > صدیقی < دی  
 اگری < دا > فیض < تے > برکت > ہی < ہے > جو < اج > اسان < فرید > سئیں < دے > روضے  
 < تے > انہاں < دی > شاعری < دا > کون < سونہاں > کاٹی < ؟ > اے < خواجہ > سئیں < دی > شا  
 < سروے > آف > انڈیا < دا > ناں < ڈتا > گئے < این > لنگویچ < سروے > وچ < مفرد > سئیں  
 < 1887 > سال < زبانیں > دی < تحقیق > تے < صرف > کیتن < ..... > این < تحقیق > کون < لینگویچ  
 < ایچ > ڈی < وی > ہن < بہوں > وڈے < محقق > ہن < جنہاں > متحدہ < ہندستان > وچ < مل تقریباً  
 < دی > منظوری < سر > گریسن < ہن > اپ < اعلیٰ > تعلیم < یافتہ > دے < نال > نال < پی  
 < سرائیکی > اینڈے < وچ > تمام < پاکستانی > زبانیں < کون > ڈیکھایا < ونج > سکدے۔ < این > نقشے  
 حکومت < دے > تعاون < نال > بڑایا < گئے > نقشے < دے > مطابق < این > علاقے < وچ > بشمول  
 < وچ > سرائیکی < سندھی > بلوچی < گجراتی > زبانیں < شامل > تنق < هن > 30ء < وچ > برٹش  
 < صدیقی > دی < گالھ > کریندے < بیٹھوں > < پاکستانی > زبانیں < دا > ..... < پاکستانی > نقد  
 دے < روضے > دی < چھاں > تلے < رہ > تے < شاعری > دیاں < لکیراں > لیکن < آلے > وسیم  
 ئیں < دی > شاعری < دا > فیض < تے > برکت > ہی < ہے > جو < اج > اسان < فرید > سئیں  
 مفرد < سئیں > تے < انہاں > دی > شاعری < دا > کون < سونہاں > کاٹی < ؟ > اے < خواجہ > سد  
 کون < لینگویچ > سروے < آف > انڈیا < دا > ناں < ڈتا > گئے < این > لنگویچ < سروے > وچ >  
 وچ < ریبا > 1887 < سال > زبانیں < دی > تحقیق < تے > صرف < کیتن > ..... < این > تحقیق  
 < نال > پی < ایچ > ڈی < وی > ہن < بہوں > وڈے < محقق > ہن < جنہاں > متحدہ < ہندستان  
 < این > نقشے < دی > منظوری < سر > گریسن < ہن > اپ < اعلیٰ > تعلیم < یافتہ > دے < نال  
 وچ < بشمول > سرائیکی < اینڈے > وچ < تمام > پاکستانی < زبانیں > کون < ڈیکھایا > ونج < سکدے۔  
 وچ < برٹش > حکومت < دے > تعاون < نال > بڑایا < گئے > نقشے < دے > مطابق < این > علاقے  
 پاکستانی < نقشے > وچ < سرائیکی > سندھی < بلوچی > گجراتی < زبانیں > شامل < تنق > هن > 30ء  
 < آلے > وسیم < صدیقی > دی < گالھ > کریندے < بیٹھوں > < پاکستانی > زبانیں < دا > نقشتہ < .....  
 فرید < سئیں > دے < روضے > دی < چھاں > تلے < رہ > تے < شاعری > دیاں < لکیراں > لیکن  
 < خواجہ > سئیں < دی > شاعری < دا > فیض < تے > برکت > ہی < ہے > جو < اج > اسان  
 < وچ > مفرد < سئیں > تے < انہاں > دی > شاعری < دا > کون < سونہاں > کاٹی < ؟ > اے  
 ن < تحقیق > کون < لینگویچ > سروے < آف > انڈیا < دا > ناں < ڈتا > گئے < این > لنگویچ < سرو  
 ہ < ہندستان > وچ < یبأ > 1887 < سال > زبانیں < دی > تحقیق < تے > صرف < کیتن > ..... < ای  
 < دے > نال < نال > پی < ایچ > ڈی < وی > ہن < بہوں > وڈے < محقق > ہن < جنہاں > متحد  
 < ونج > سکدے۔ < این > نقشتہ < دی > منظوری < سر > گریسن < ہن > اپ < اعلیٰ > تعلیم < یافتہ

ایں > علاقے > وچ > بشمول > سرائیکی > ایندے > وچ > تمام > پاکستانی > زبانیں > کوں > ڈیکھایا >  
 ن > 30ء > وچ > برٹش > حکومت > دے > تعاون > نال > بڑایا > گئے > نقشے > دے > مطابق >  
 > دا > ..... > پاکستانی > نقشے > وچ > سرائیکی > سندھی > بلوچی > گجراتی > زبانیں > شامل > تقریب > ہ  
 لکیراں > لیکن > آلے > وسیم > صدیقی > دی > گالھ > کریندے > بیٹھوں > > پاکستانی > زبانیں > دا  
 > اج > اساں > فرید > سئیں > دے > روضے > دی > چھاں > تلے > رہ > تے > شاعری > دیاں >  
 ائنی > ؟ > اے > خواجہ > سئیں > دی > شاعری > دا > فیض > تے > برکت > ہی > ہے > جو >  
 > لنگویچ > سروے > وچ > مفرد > سئیں > تے > انہاں > دی > شاعری > دا > کون > سونہاں > ک  
 > کیتن > ..... > ایں > تحقیق > کوں > لنگویچ > سروے > آف > انڈیا > دا > ناں > ڈٹا > گئے > ایں  
 > جنہاں > متحدہ > ہندستان > وچ > تبا > 1887 > سال > زبانیں > دی > تحقیق > تے > صرف  
 > تعلیم > یافتہ > دے > نال > نال > پی > ایچ > ڈی > وی > ہن > بہوں > وڈے > محقق > ہن  
 کوں > ڈیکھایا > ونج > سکدے۔ > ایں > نقشے > دی > منظوری > سر > گریسن > ہن > اپ > اعلی  
 دے > مطابق > ایں > علاقے > وچ > بشمول > سرائیکی > ایندے > وچ > تمام > پاکستانی > زبانیں >  
 > شامل > قریب > ہن > 30ء > وچ > برٹش > حکومت > دے > تعاون > نال > بڑایا > گئے > نقشے >  
 > زبانیں > دا > زبانیں > ..... > پاکستانی > نقشے > وچ > سرائیکی > سندھی > بلوچی > گجراتی > زبانیں  
 > شاعری > دیاں > لکیراں > لیکن > آلے > وسیم > صدیقی > دی > گالھ > کریندے > بیٹھوں > >  
 > ہی > ہے > جو > اج > اساں > فرید > سئیں > دے > روضے > دی > چھاں > تلے > رہ > تے  
 ا > کون > سونہاں > کاننی > ؟ > اے > خواجہ > سئیں > دی > شاعری > دا > فیض > تے > برکت  
 اں > ڈٹا > گئے > ایں > لنگویچ > سروے > وچ > مفرد > سئیں > تے > انہاں > دی > شاعری > د  
 تحقیق > تے > صرف > کیتن > ..... > ایں > تحقیق > کوں > لنگویچ > سروے > آف > انڈیا > دا > ن  
 > وڈے > محقق > ہن > جنہاں > متحدہ > ہندستان > وچ > تق > 1887 > سال > زبانیں > دی >  
 سن > ہن > اپ > اعلی > تعلیم > یافتہ > دے > نال > نال > پی > ایچ > ڈی > وی > ہن > بہوں  
 > پاکستانی > زبانیں > کوں > ڈیکھایا > ونج > سکدے۔ > ایں > نقشے > دی > منظوری > سر > گریسن  
 بڑایا > گئے > نقشے > دے > مطابق > ایں > علاقے > وچ > بشمول > سرائیکی > ایندے > وچ > تمام  
 > 1887 زبانیں > شامل > ریبا ہن > 30ء > وچ > برٹش > حکومت > دے > تعاون > نال >
