# Supplementary material for: Mixed Script Identification Using Automated DNN Hyperparameter Optimization
Source: Hindawi journal article supplement (doi:10.1155/2021/8415333), 2021-01-01
Supplement: f1 [file 8415333.f1.zip]

سیدھا  
گشتی مراسلہ  
شکلیں  
چوڑا  
باریک  
موٹا حصہ  
لمبا  
چھوٹا  
مختصر  
پتلا  
لمبا  
گہرا  
بڑا  
حجم  
زرد  
سفید  
سرخ  
جامنی  
نارنگی  
سبز  
خاکستری  
کتھئی  
نیلا  
کالا

square cheokeor - چوکور  
triangular meseleseey shekel kai - مثلثی شکل کے  
tastes dha'iqai - ذائقے  
bitter kereoa - کڑوا  
fresh tazeh - تازہ  
salty nemekeyn - نمکین  
sour teresh - ترش  
spicy meşaleheh dare/cheṭ peṭa - مصالحہ دار/چٹ پٹا  
sweet meyṭeha - میٹھا  
qualities kheobeyan - خوبیاں  
bad bera - برا  
clean şaf - صاف  
dark anedeheyra - اندھیرا  
difficult meshekel - مشکل  
dirty meyla - میلا  
dry seokeha - سوکھا  
easy asan - آسان  
empty khaley - خالی  
expensive mehenegua - مہنگا  
fast teyz reo - تیز رو  
foreign gheyr melek - غیر ملک  
full lebereyz - لبریز  
good acheha - اچھا  
hard sekhet - سخت  
heavy beharey - بھاری  
inexpensive kem qeymet - کم قیمت  
light reosheney - روشنی  
local meqamey - مقامی  
new neya - نیا  
noisy per sheor - پر شور  
old 'emer resejdeh - عمر رسیدہ

powerful ta qeteor - طاقتور  
 quiet khameosh - خاموش  
 correct dereset - درست  
 slow aheseteh - آہستہ  
 soft nerem - نرم  
 very zeyadeh - زیادہ  
 weak kemezeor - کمزور  
 wet gueyla - گیلا  
 wrong ghelet - غلط  
 young jeoan - جوان  
 quantities meqedareyn - مقداریں  
 few chened - چند  
 little cheheoṭa - چھوٹا  
 many behet - بہت  
 much keseyr - کثیر  
 part heṣeh - حصہ  
 some kecheh - کچھ  
 a few chened ayk - چند ایک  
 whole tamam - تمام  
 le(guezera heoa) - کل(گزرا ہوا)  
 today aj - آج  
 tomorrow kele(anai oala) - کل(آنے والا)  
 now abehey - ابھی  
 then teb - تب  
 later be'ed meyn - بعد میں  
 tonight aj rat - آج رات  
 right now abehey abehey - ابھی ابھی  
 last night guezeray heo'iy rat - گزری ہوئی رات  
 this morning aj ṣebəḥ - آج صبح  
 next week aguēlai hefetai - اگلے ہفتے  
 already pehelai sai - پہلے سے  
 recently abehey - ابھی  
 lately kecheh den heo'iai - کچھ دن ہوئے  
 soon 'eneqereyb - عنقریب  
 immediately feora - فوراً  
 still abehey tek - ابھی تک  
 yet abehey tek - ابھی تک  
 ago guezesheteh - گزشتہ  
 adverbs of place mete'eleq afe'al (jegueh ka) - متعلق افعال (جگہ کا)  
 here yhan - یہاں  
 there adeher - ادھر  
 over there ohan per - وہاں پر  
 everywhere her jegueh - ہر جگہ  
 anywhere kesey jegueh sai - کسی جگہ سے  
 nowhere keheyn neheyn - کہیں نہیں  
 home gueher - گھر  
 away deor - دور  
 out baher - باہر  
 adverbs of manner mete'eleq afe'al (adeb ka) - متعلق افعال (ادب کا)  
 very nehayte/zeyadeh - نہایت/زیادہ  
 quite balekele/temame/seraser - بالکل/تمام/سراسر  
 pretty kheobeṣeorete/hesey - خوبصورت/حسین  
 really aṣel meyn - اصل میں  
 fast teyz reo - تیز رو  
 well acheha - اچھا

hard sekhet - سخت

quickly teyzey sai - تیزی سے

slowly aheseteguey sai - آہستگی سے

carefully mehetat anedaz meyn - محتاط انداز میں

hardly bemeshekel - بمشکل

barely bemeshekel - بمشکل

mostly beysheter - بیشتر

almost teqereyba - تقریباً

absolutely qete'a - قطعاً

together akehetai - اکٹھے

alone akeylai - اکیلے

adverbs of frequency mete'eleq afe'al te'eded ka - متعلق افعال تعدد کا

always hemeysheh - ہمیشہ

frequently akeser - اکثر

usually 'emeoma - عموماً

sometimes kebehey kebehey - کبھی کبھی

occasionally kebehey kebehar heonai oala - کبھی کبھار ہونے والا

seldom shaz o nader - شاز و نادر

rarely shaz o nader - شاز و نادر

never kebehey neheyn - کبھی نہیں
