# Supplementary figures and images for: Mixed Script Identification Using Automated DNN Hyperparameter Optimization
Source: Hindawi journal article supplement (doi:10.1155/2021/8415333), 2021-01-01

# LSTM

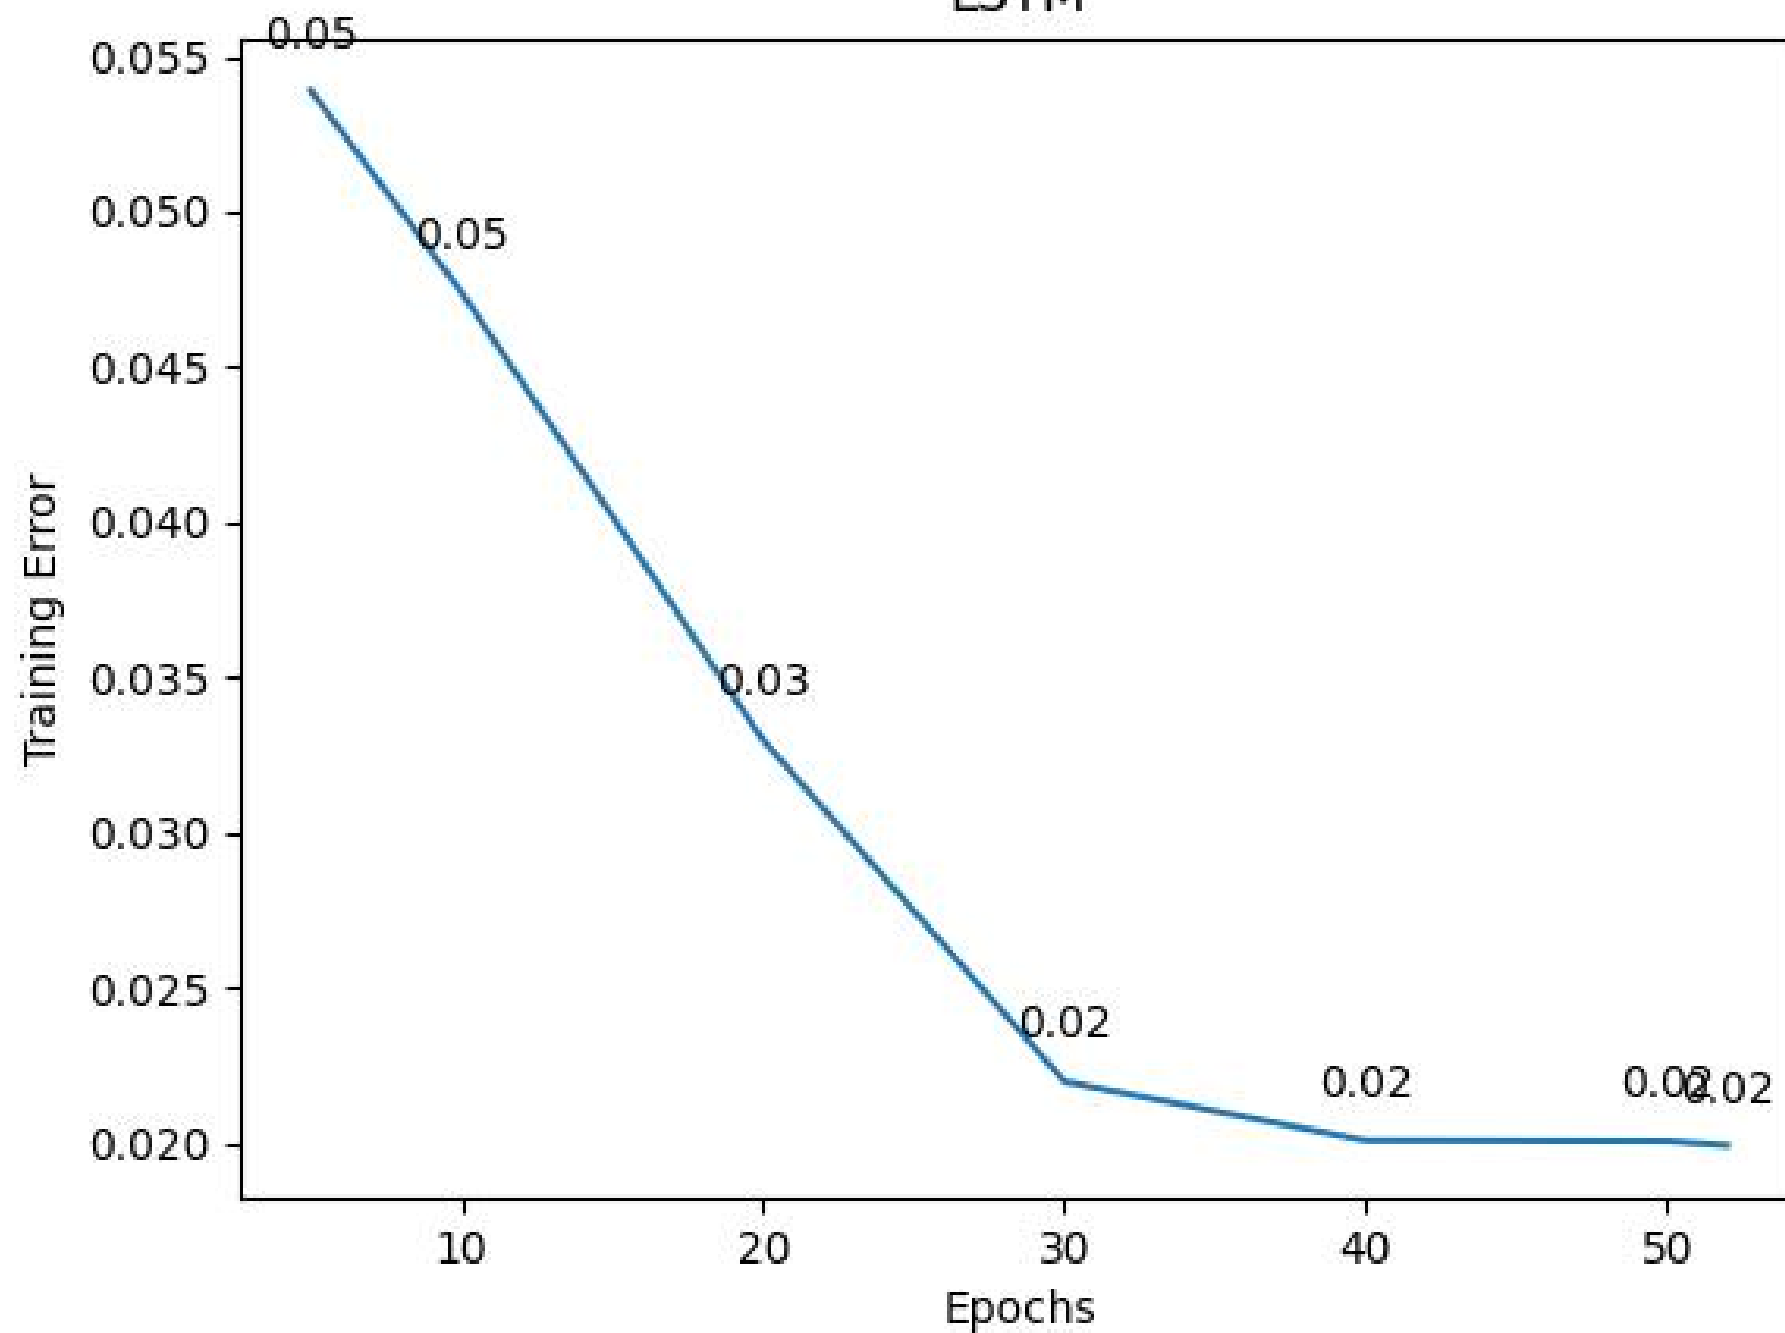

Supplement: f1 [file 8415333.f1.zip]

## LSTM

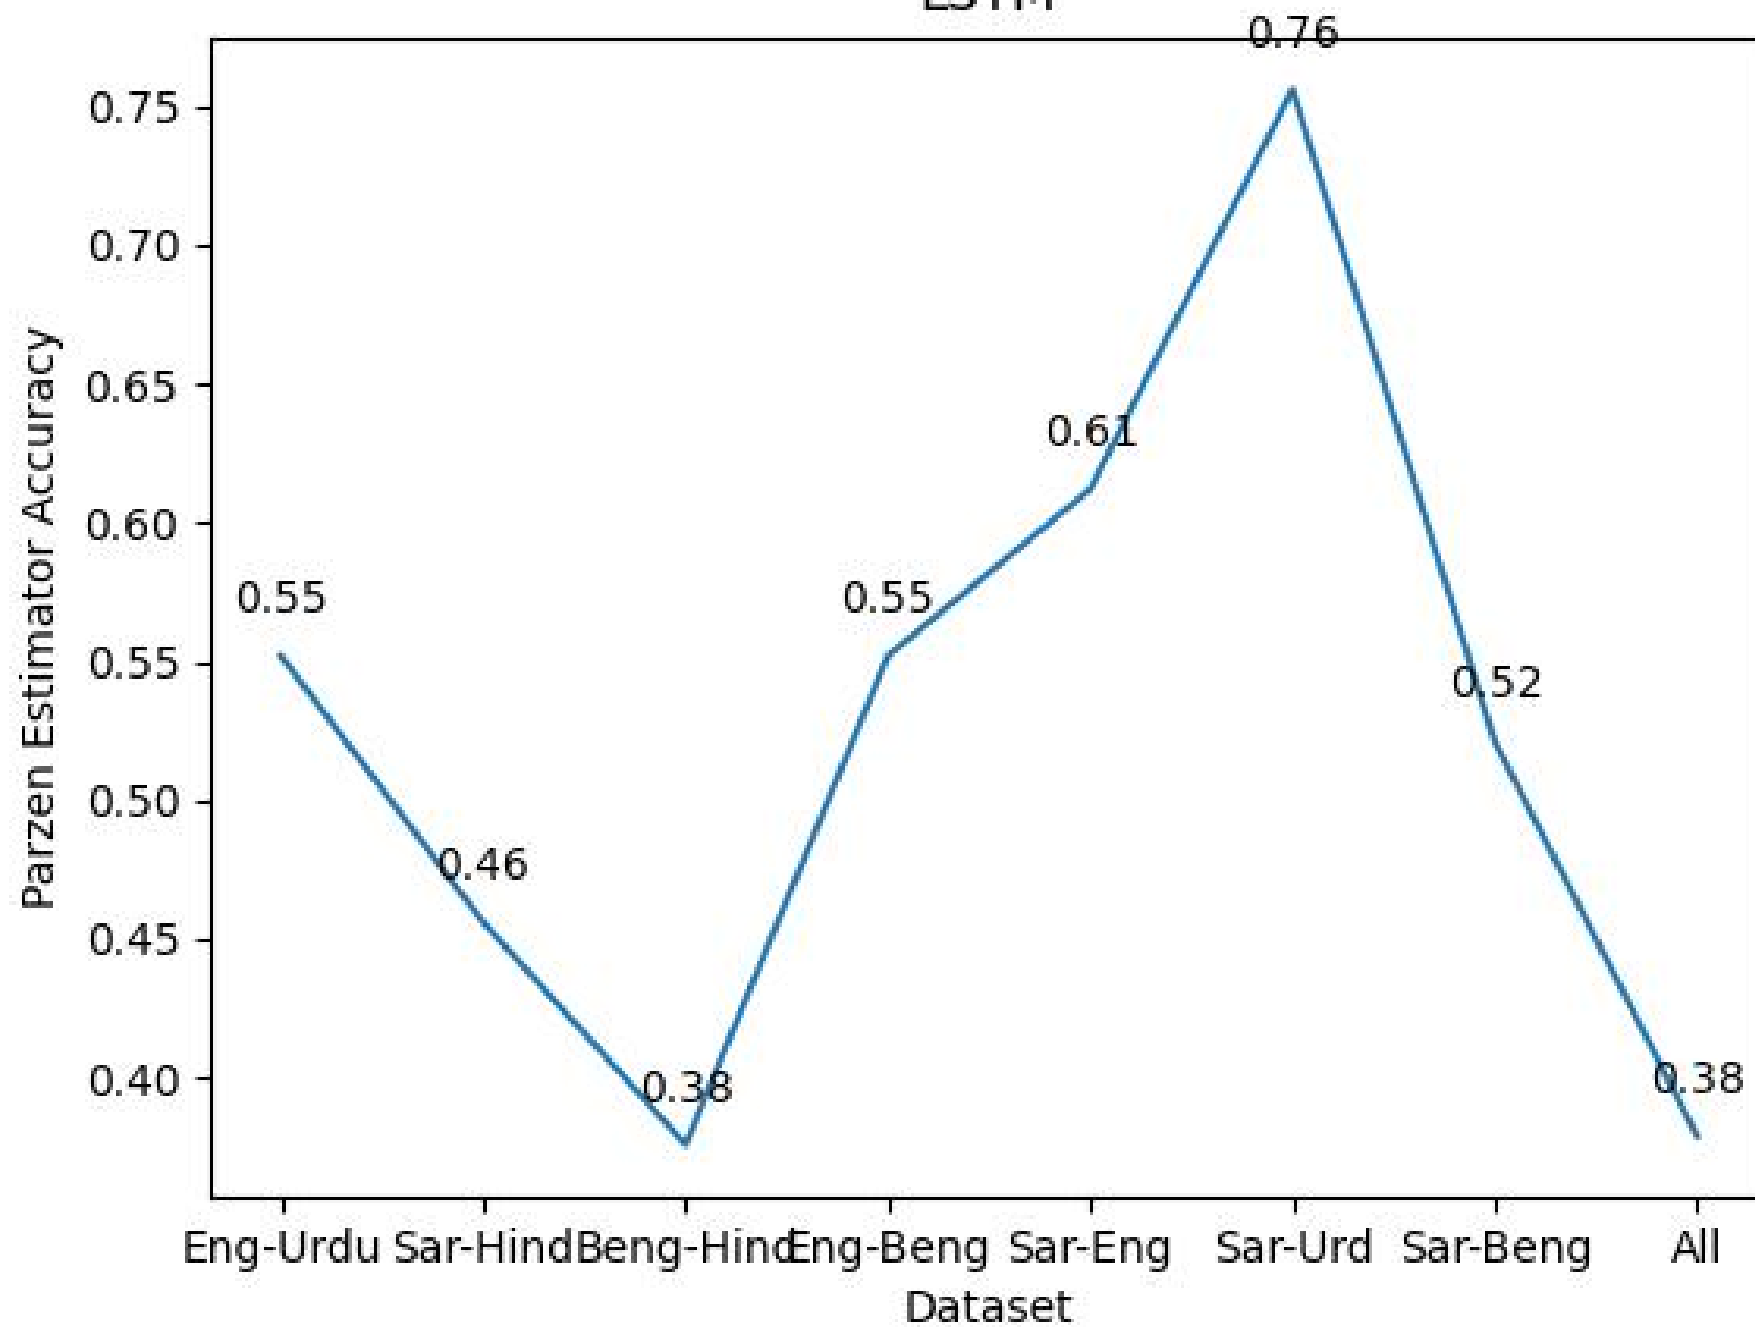

Supplement: f1 [file 8415333.f1.zip]

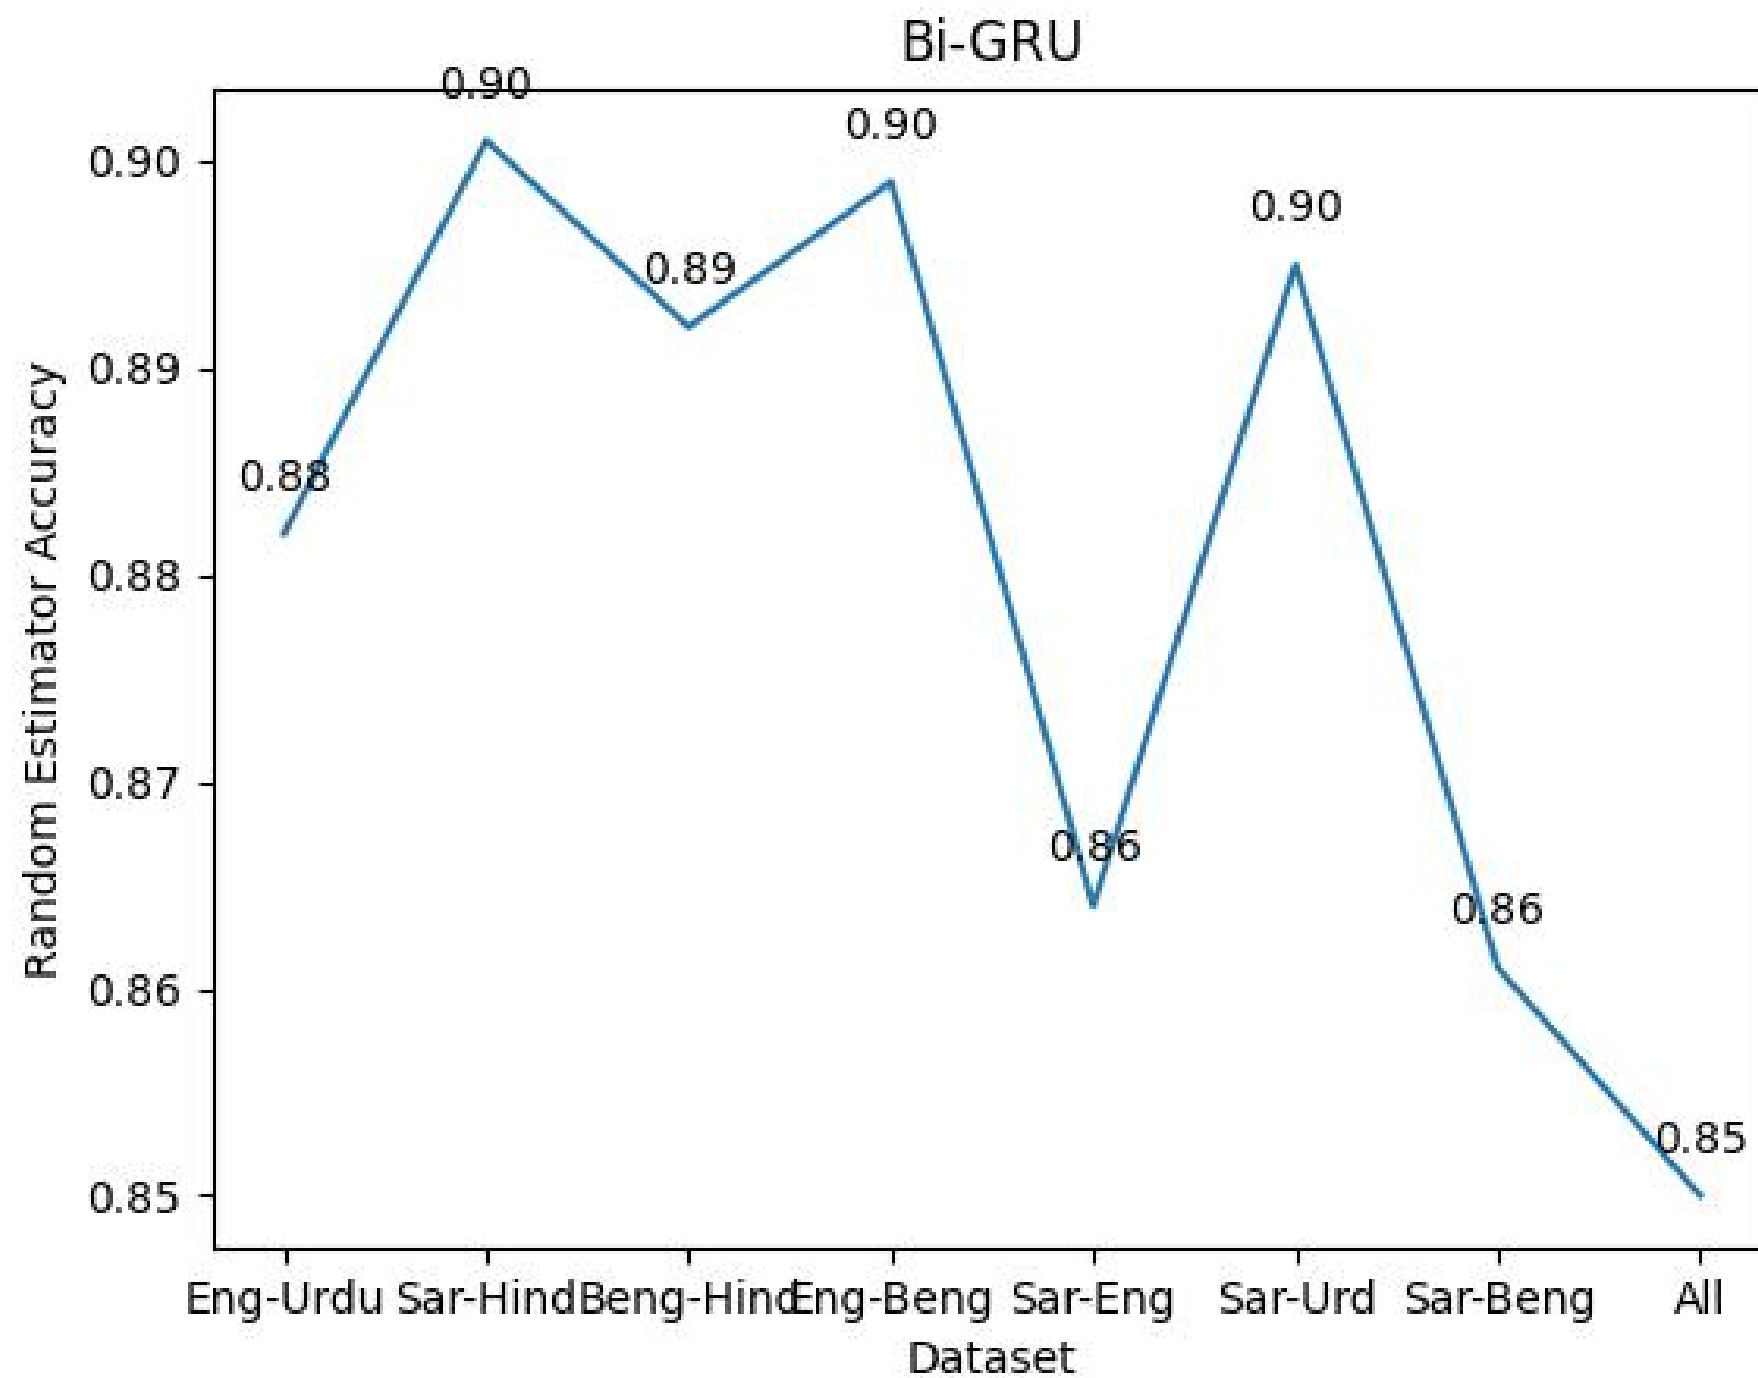

Supplement: f1 [file 8415333.f1.zip]

Bi-LSTM

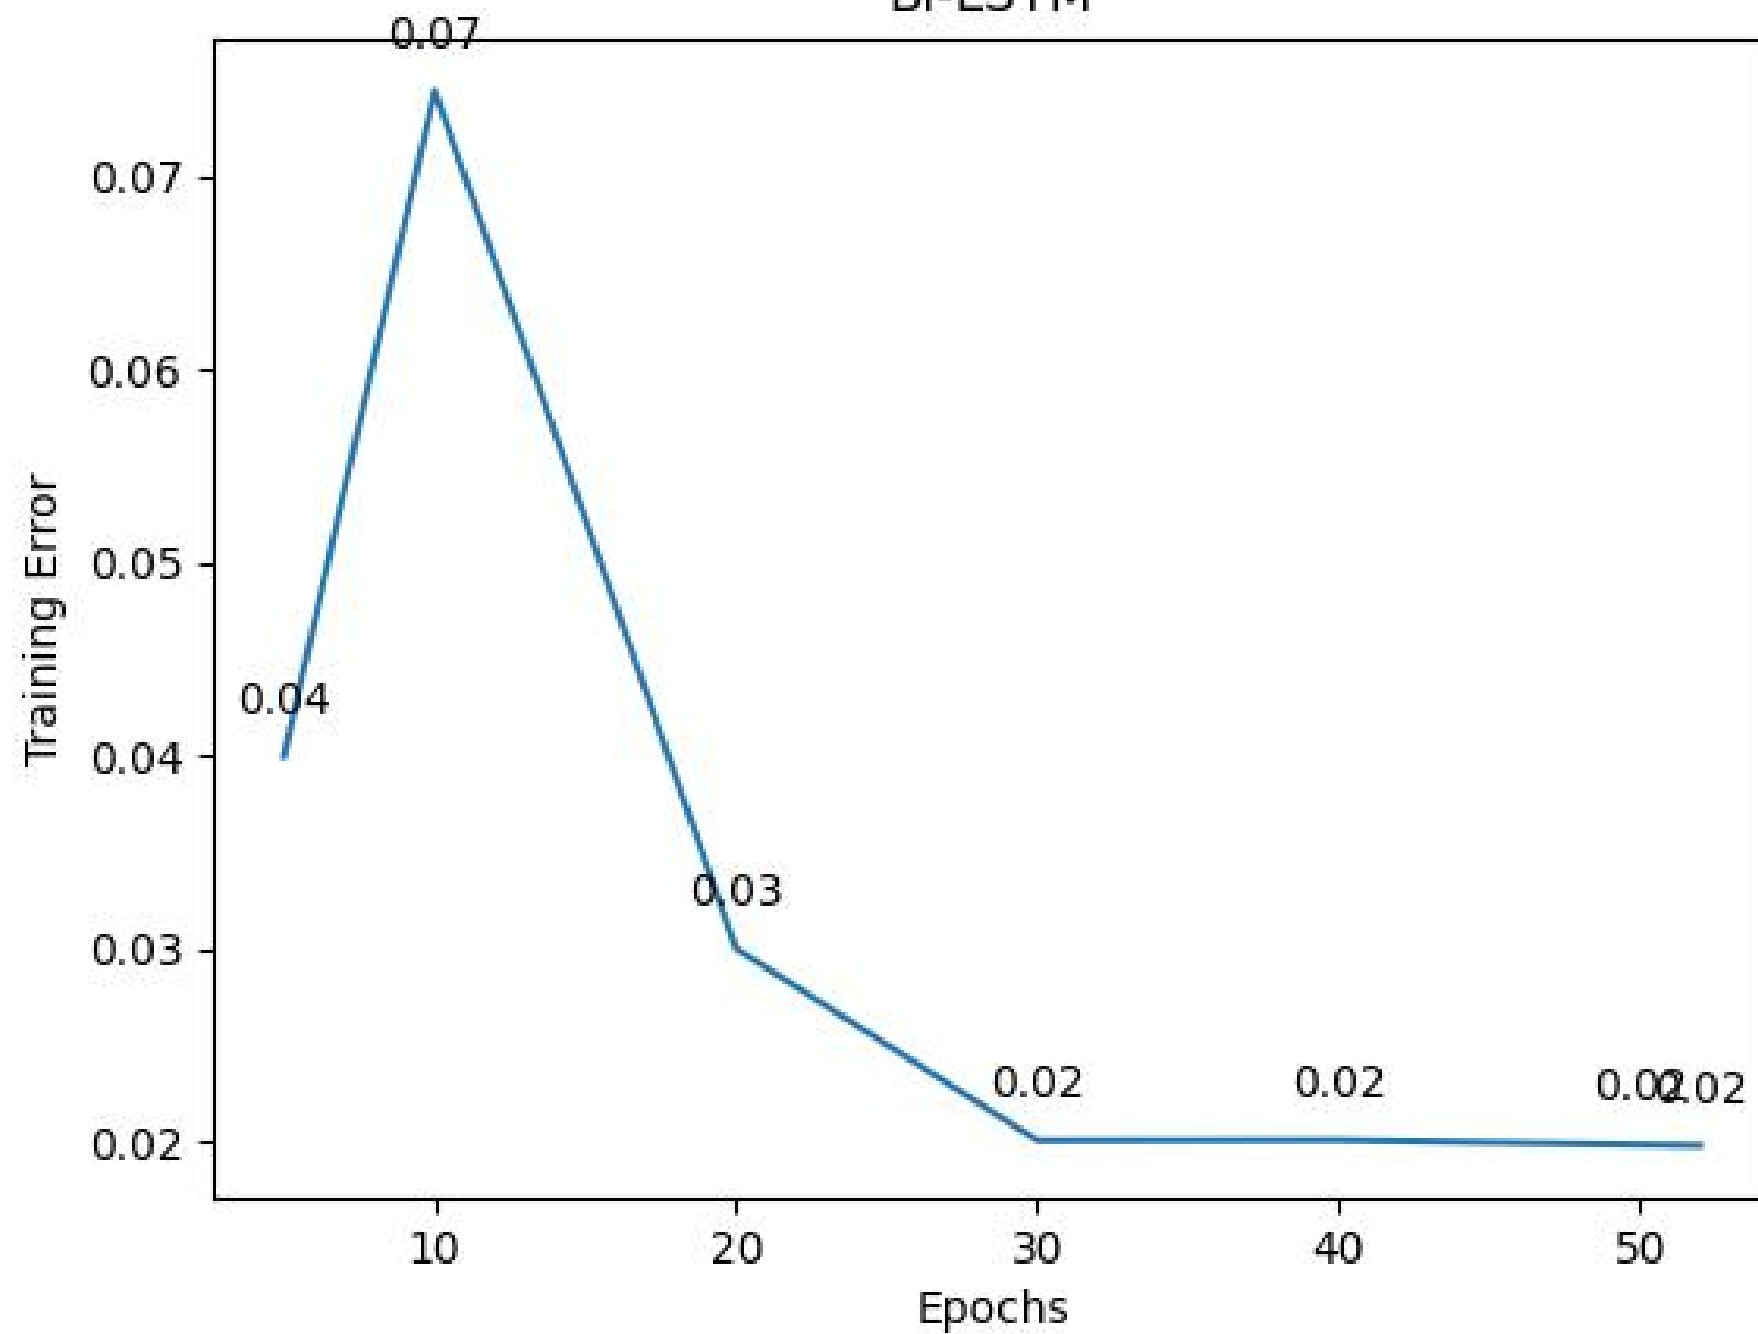

Supplement: f1 [file 8415333.f1.zip]

Bi-GRU

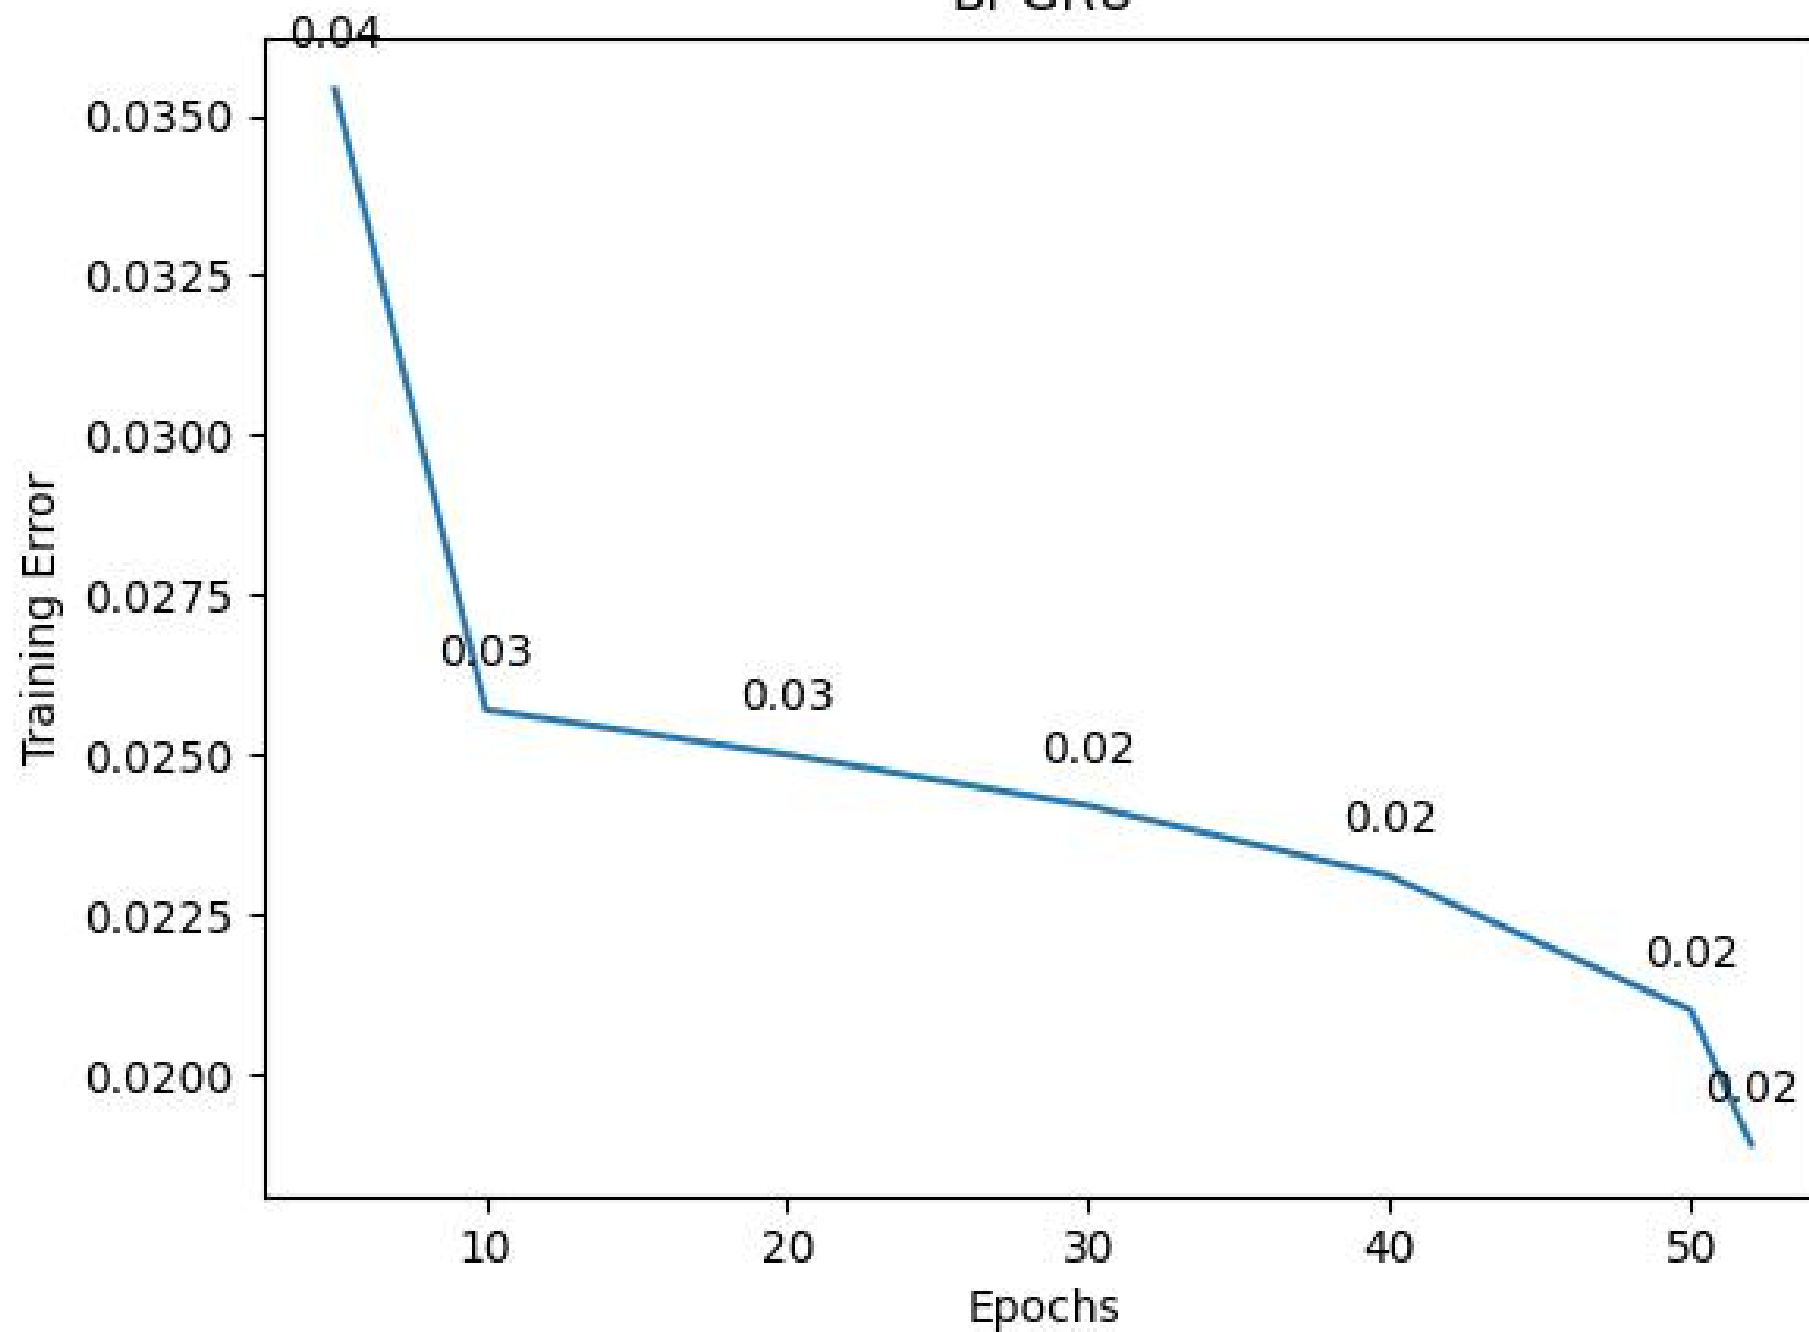

Supplement: f1 [file 8415333.f1.zip]

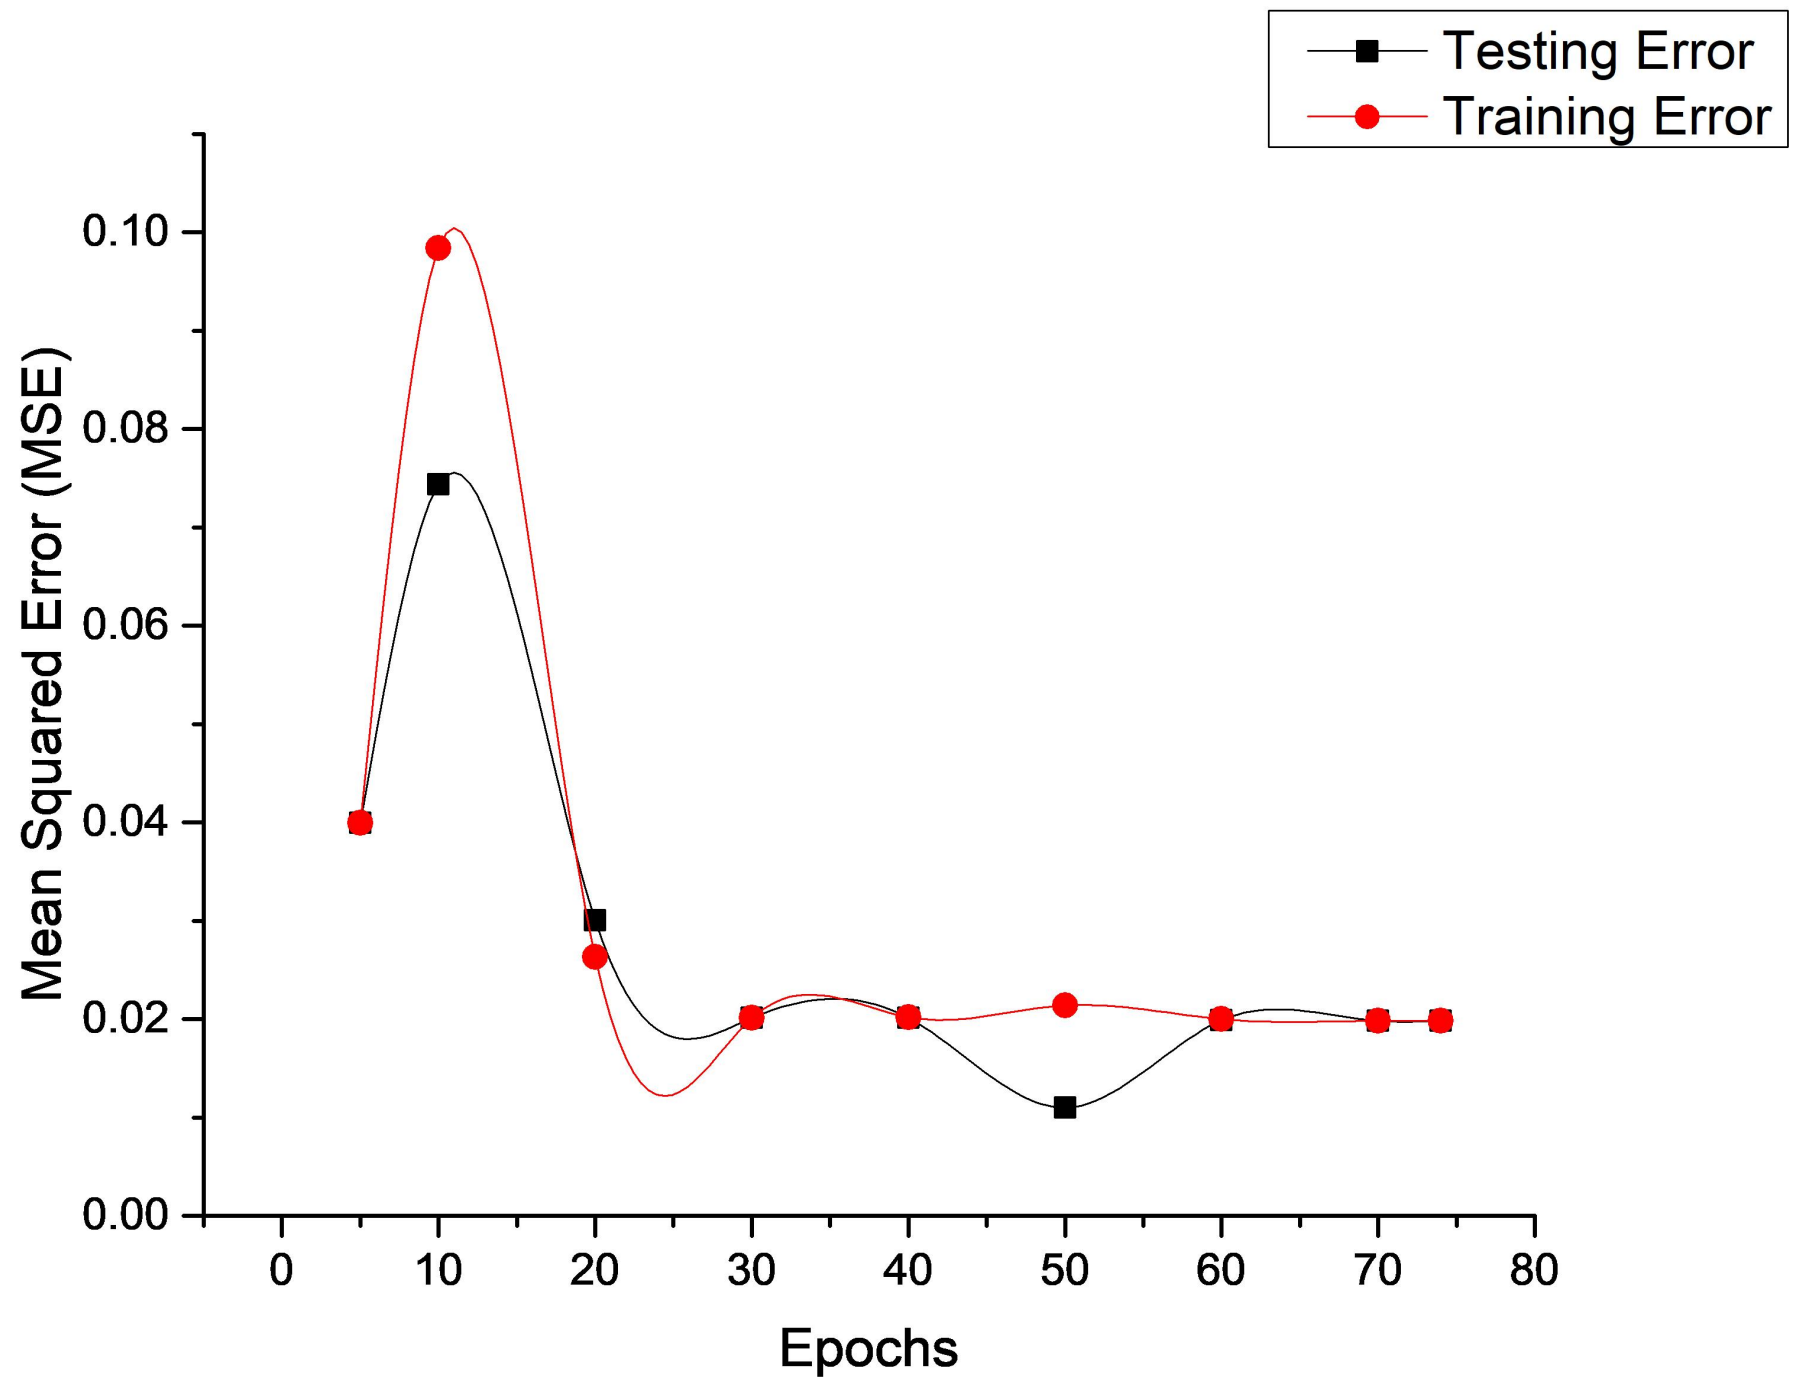

Supplement: f1 [file 8415333.f1.zip]

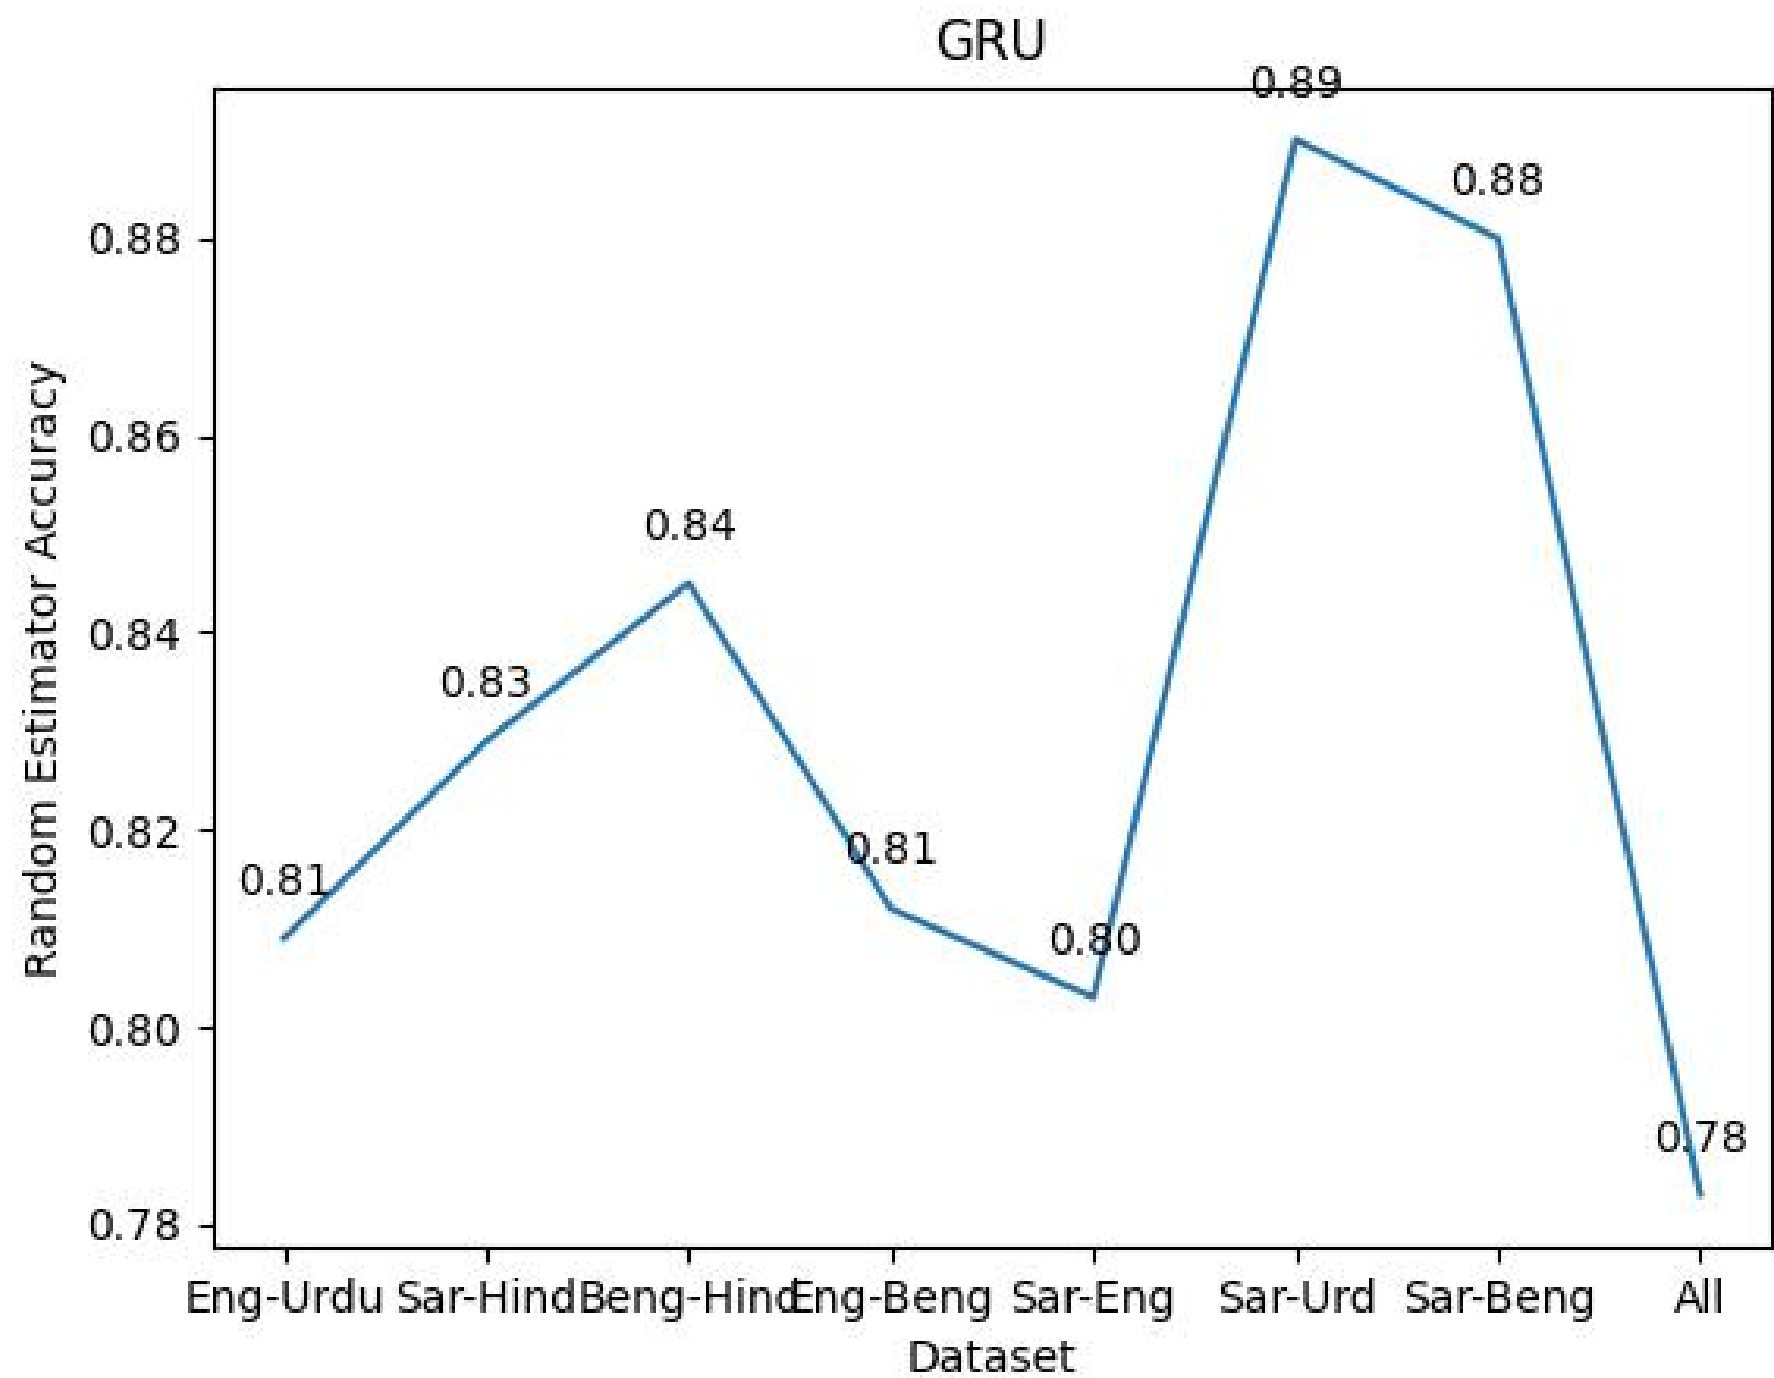

Supplement: f1 [file 8415333.f1.zip]

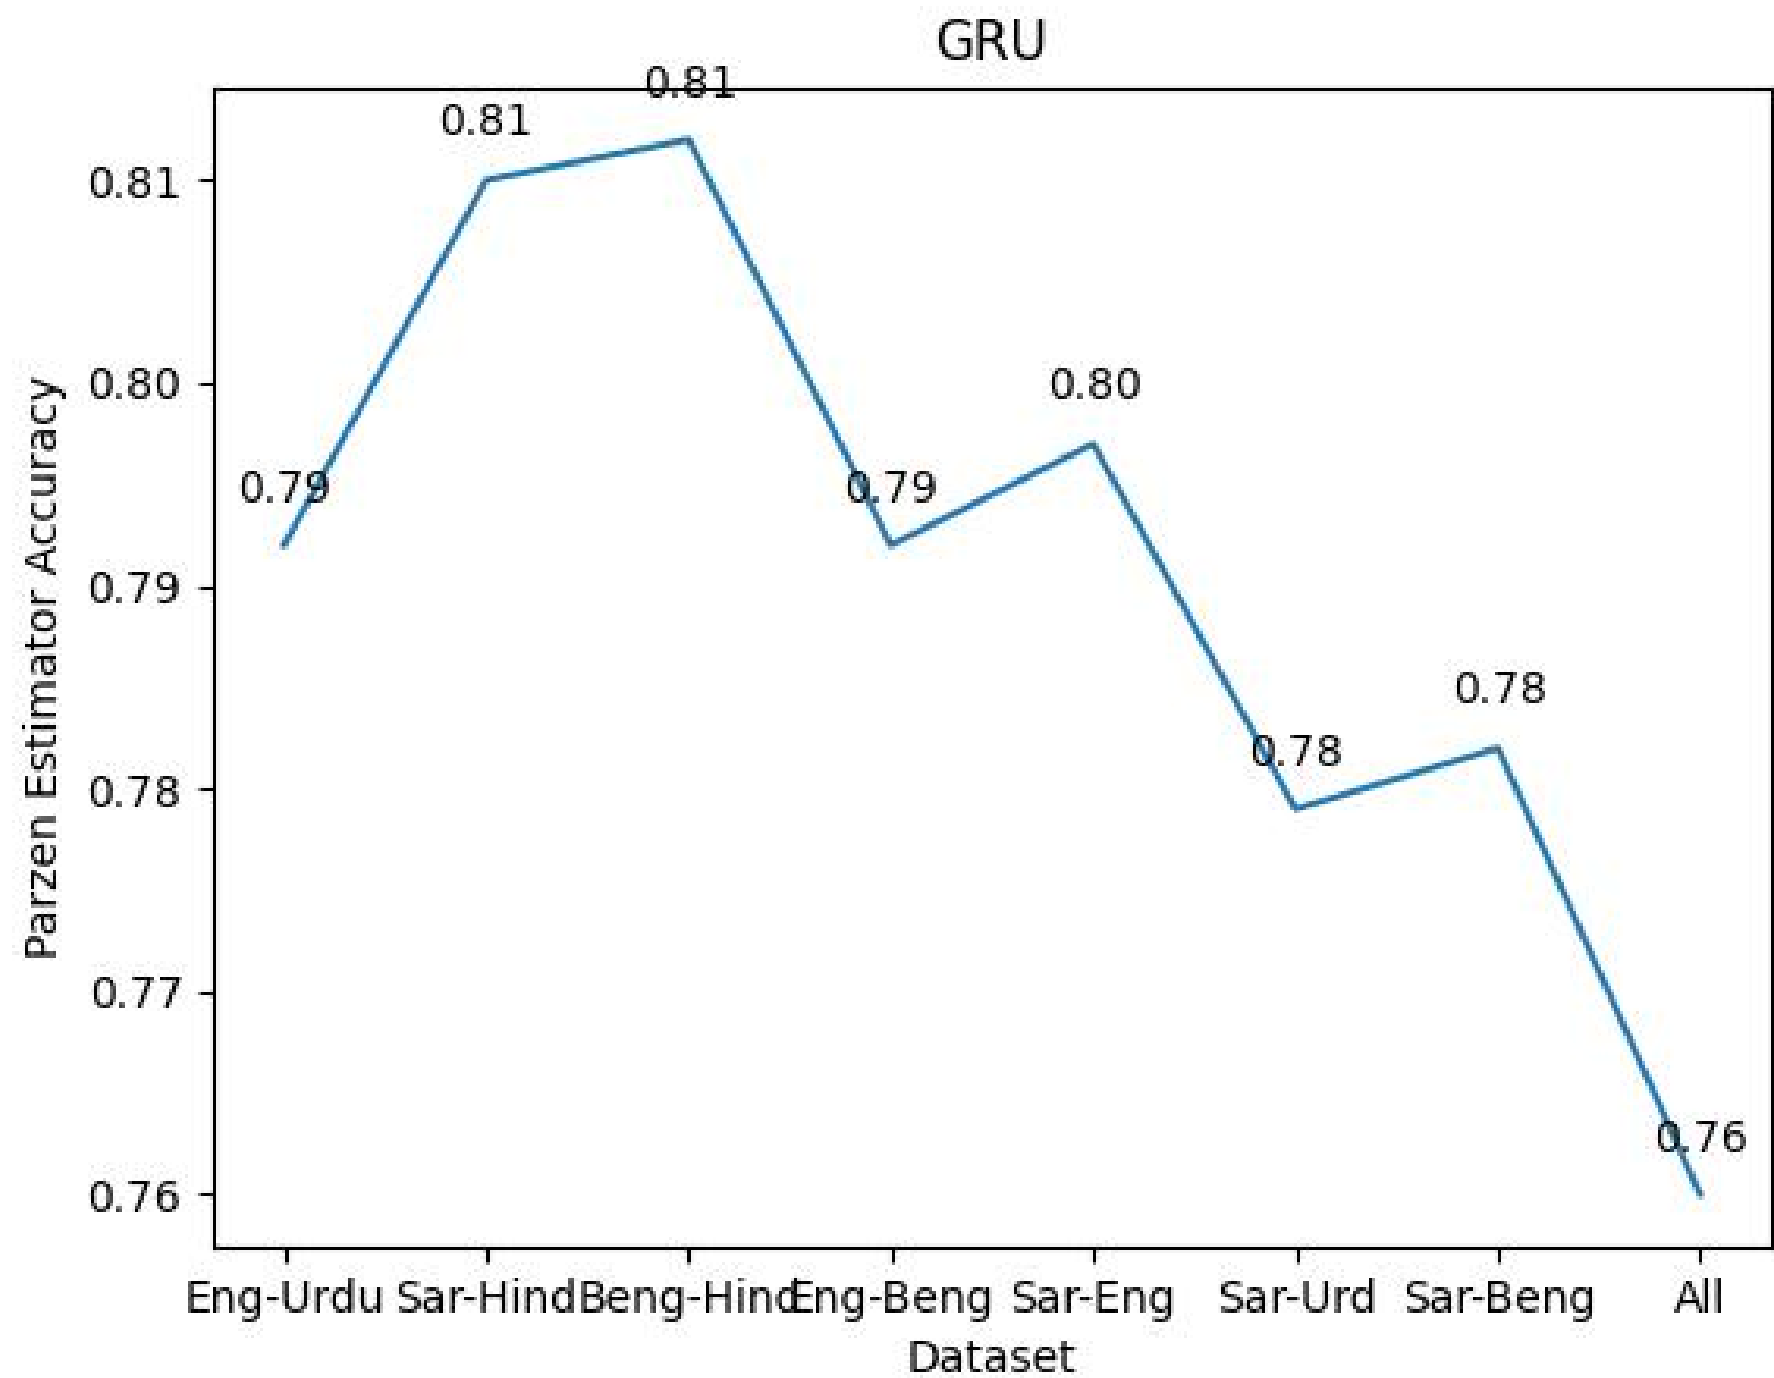

Supplement: f1 [file 8415333.f1.zip]

Bi-LSTM

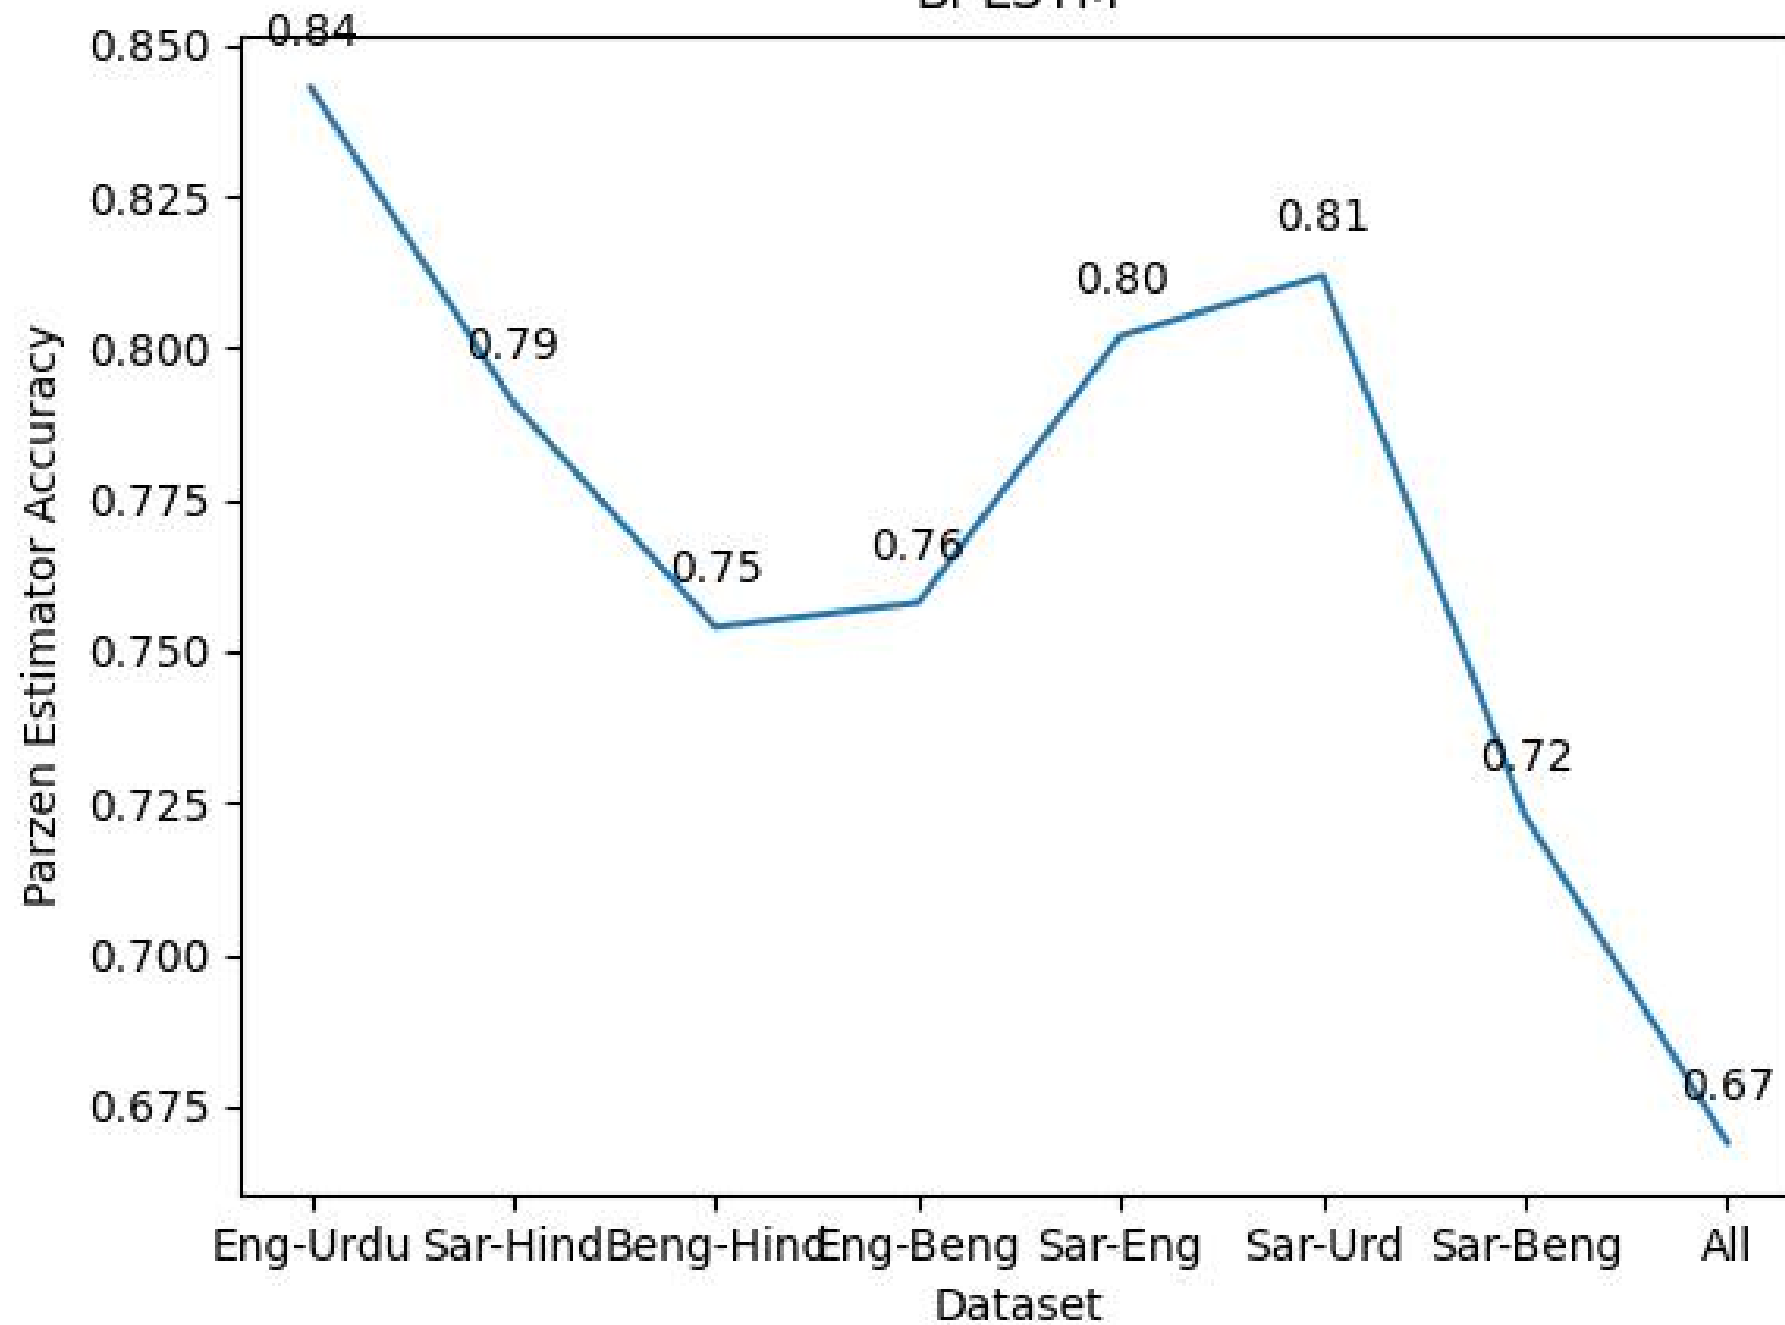

Supplement: f1 [file 8415333.f1.zip]

Bi-LSTM

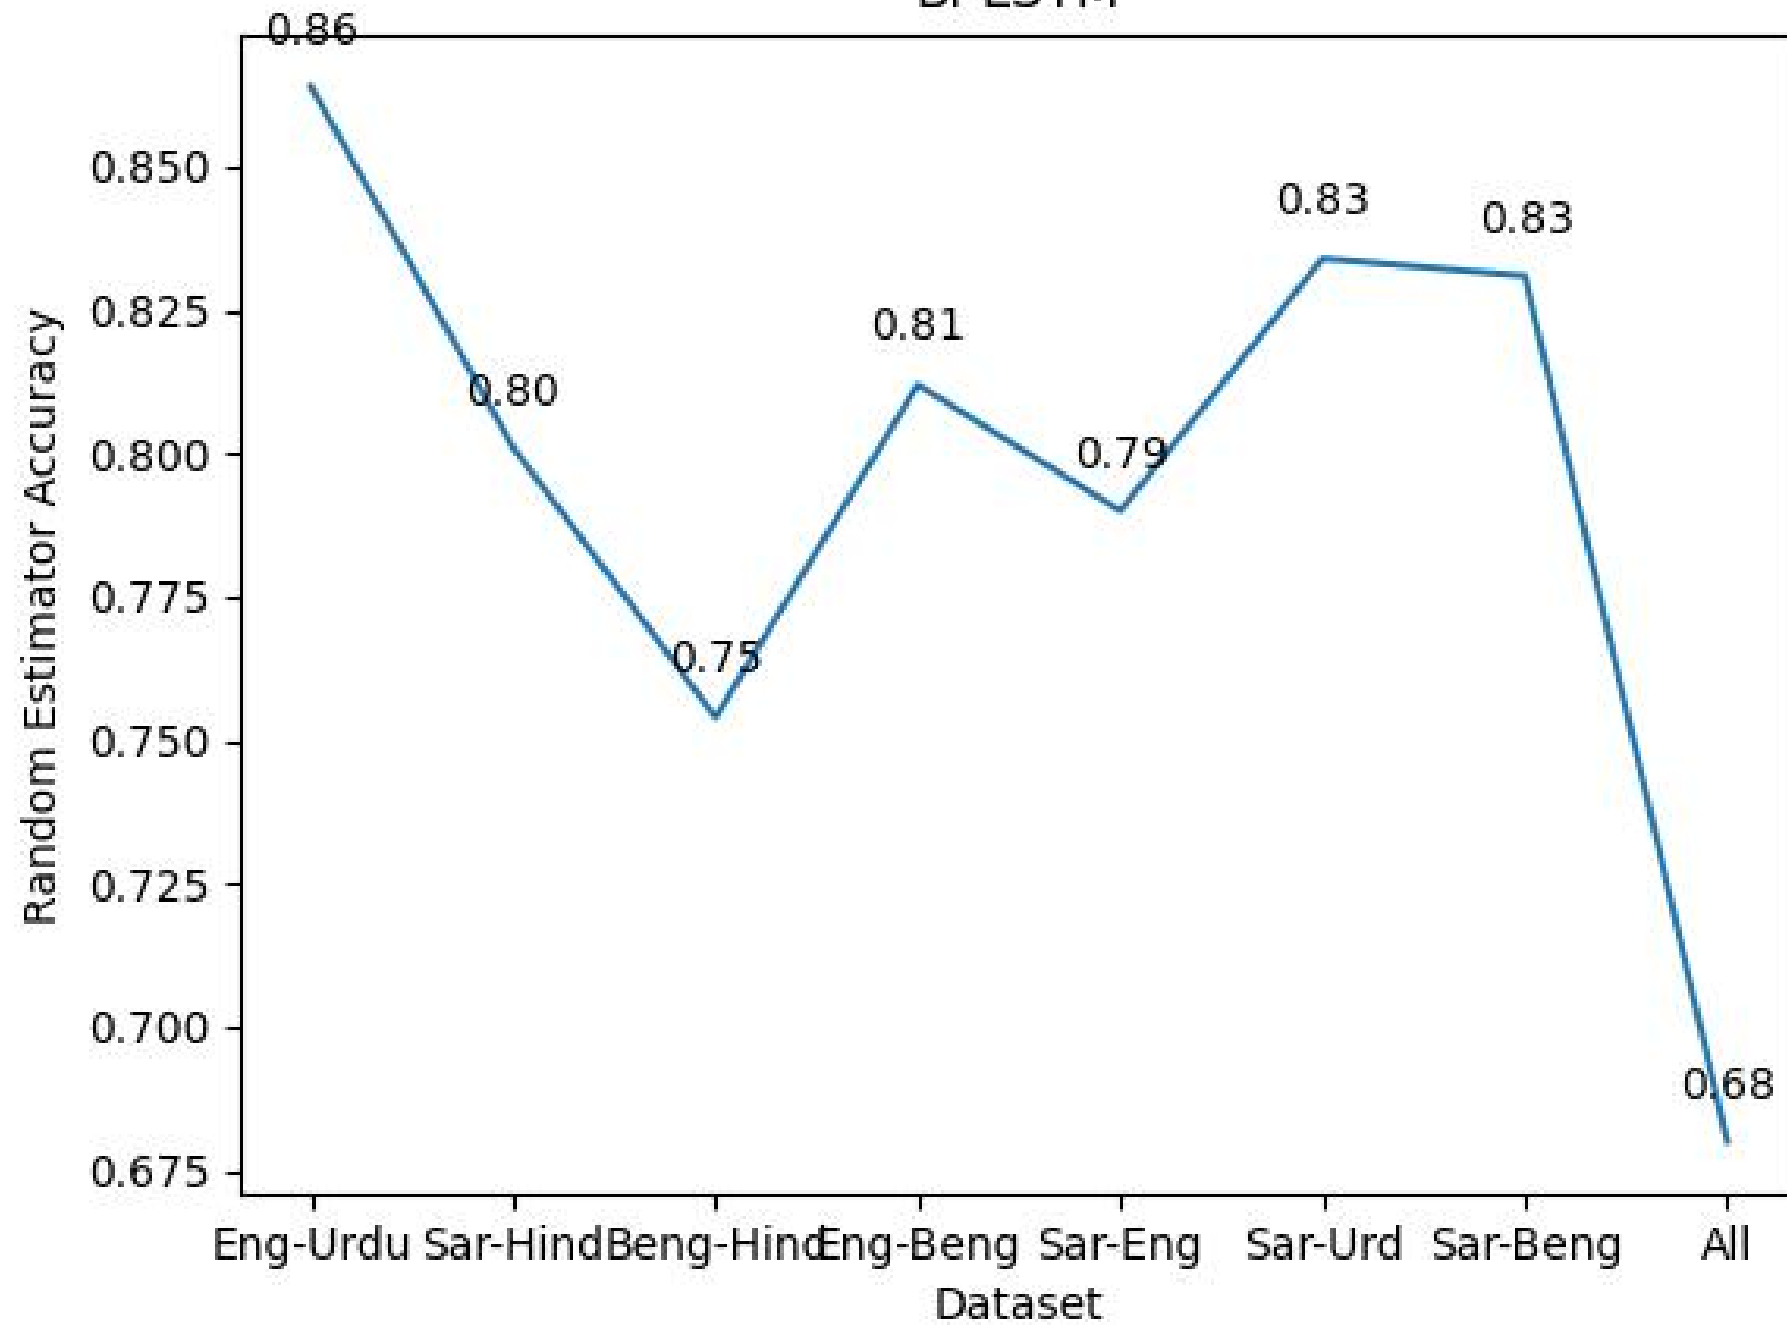

Supplement: f1 [file 8415333.f1.zip]

## GRU

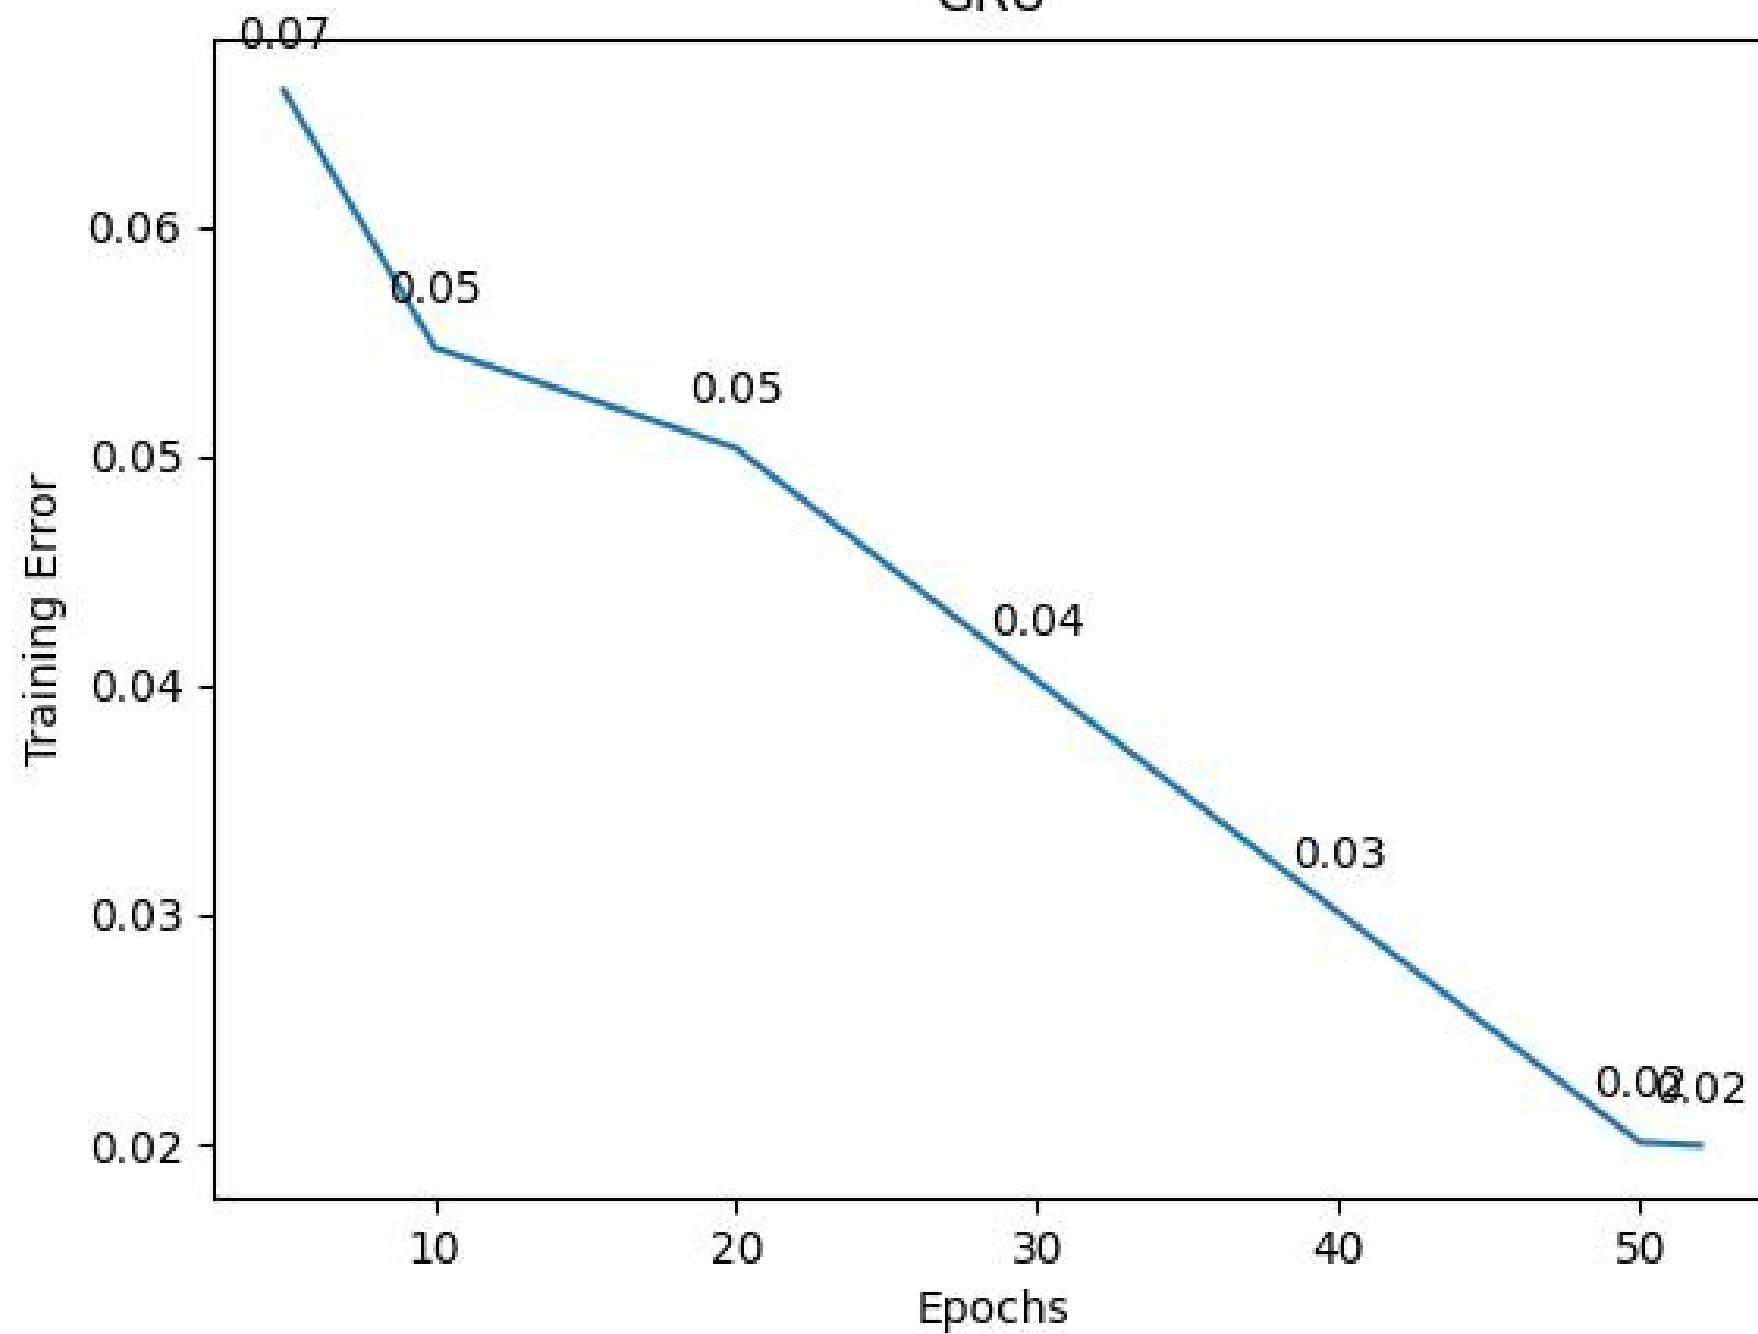

Supplement: f1 [file 8415333.f1.zip]

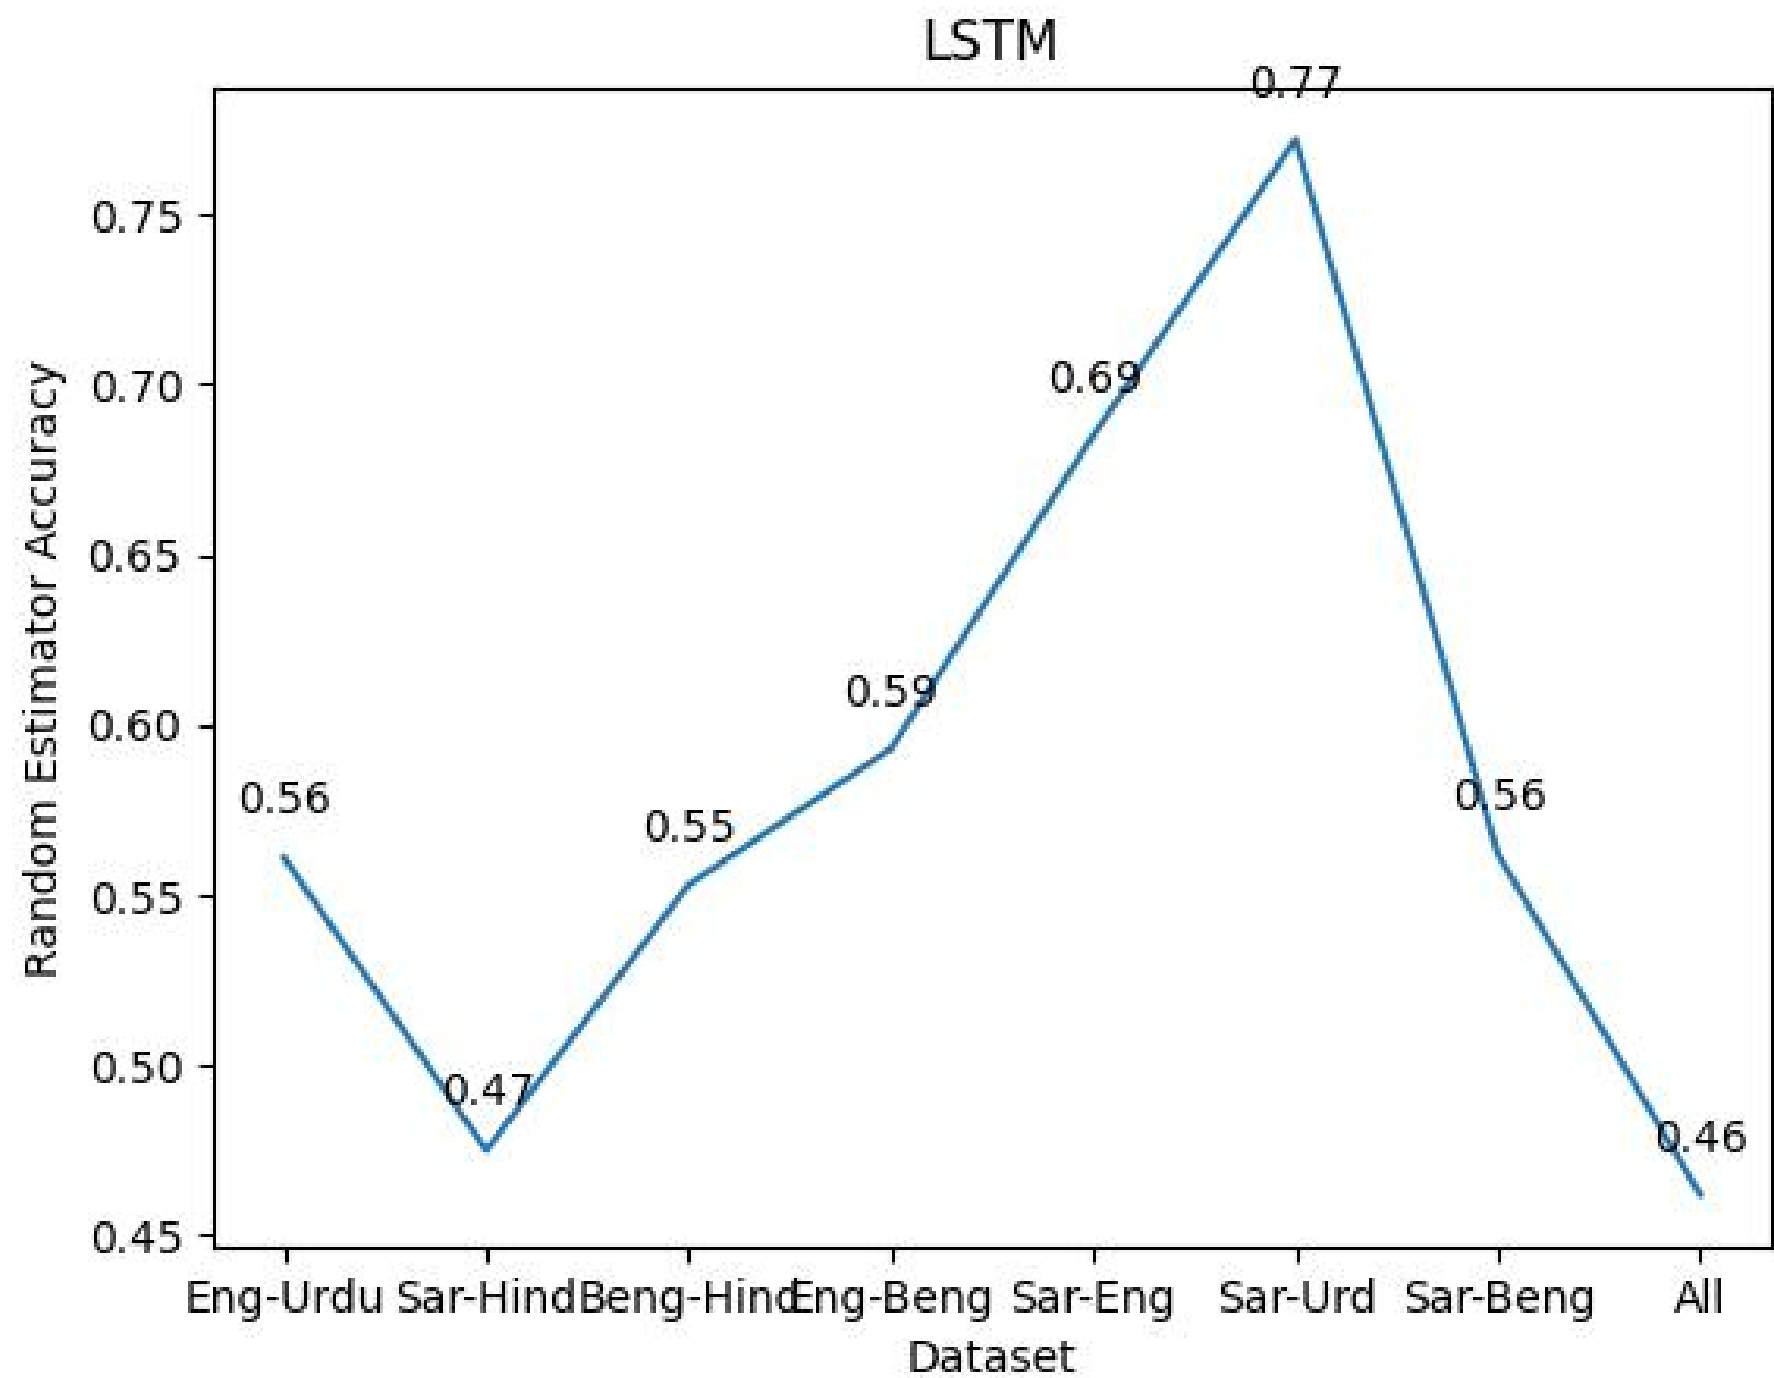

Supplement: f1 [file 8415333.f1.zip]

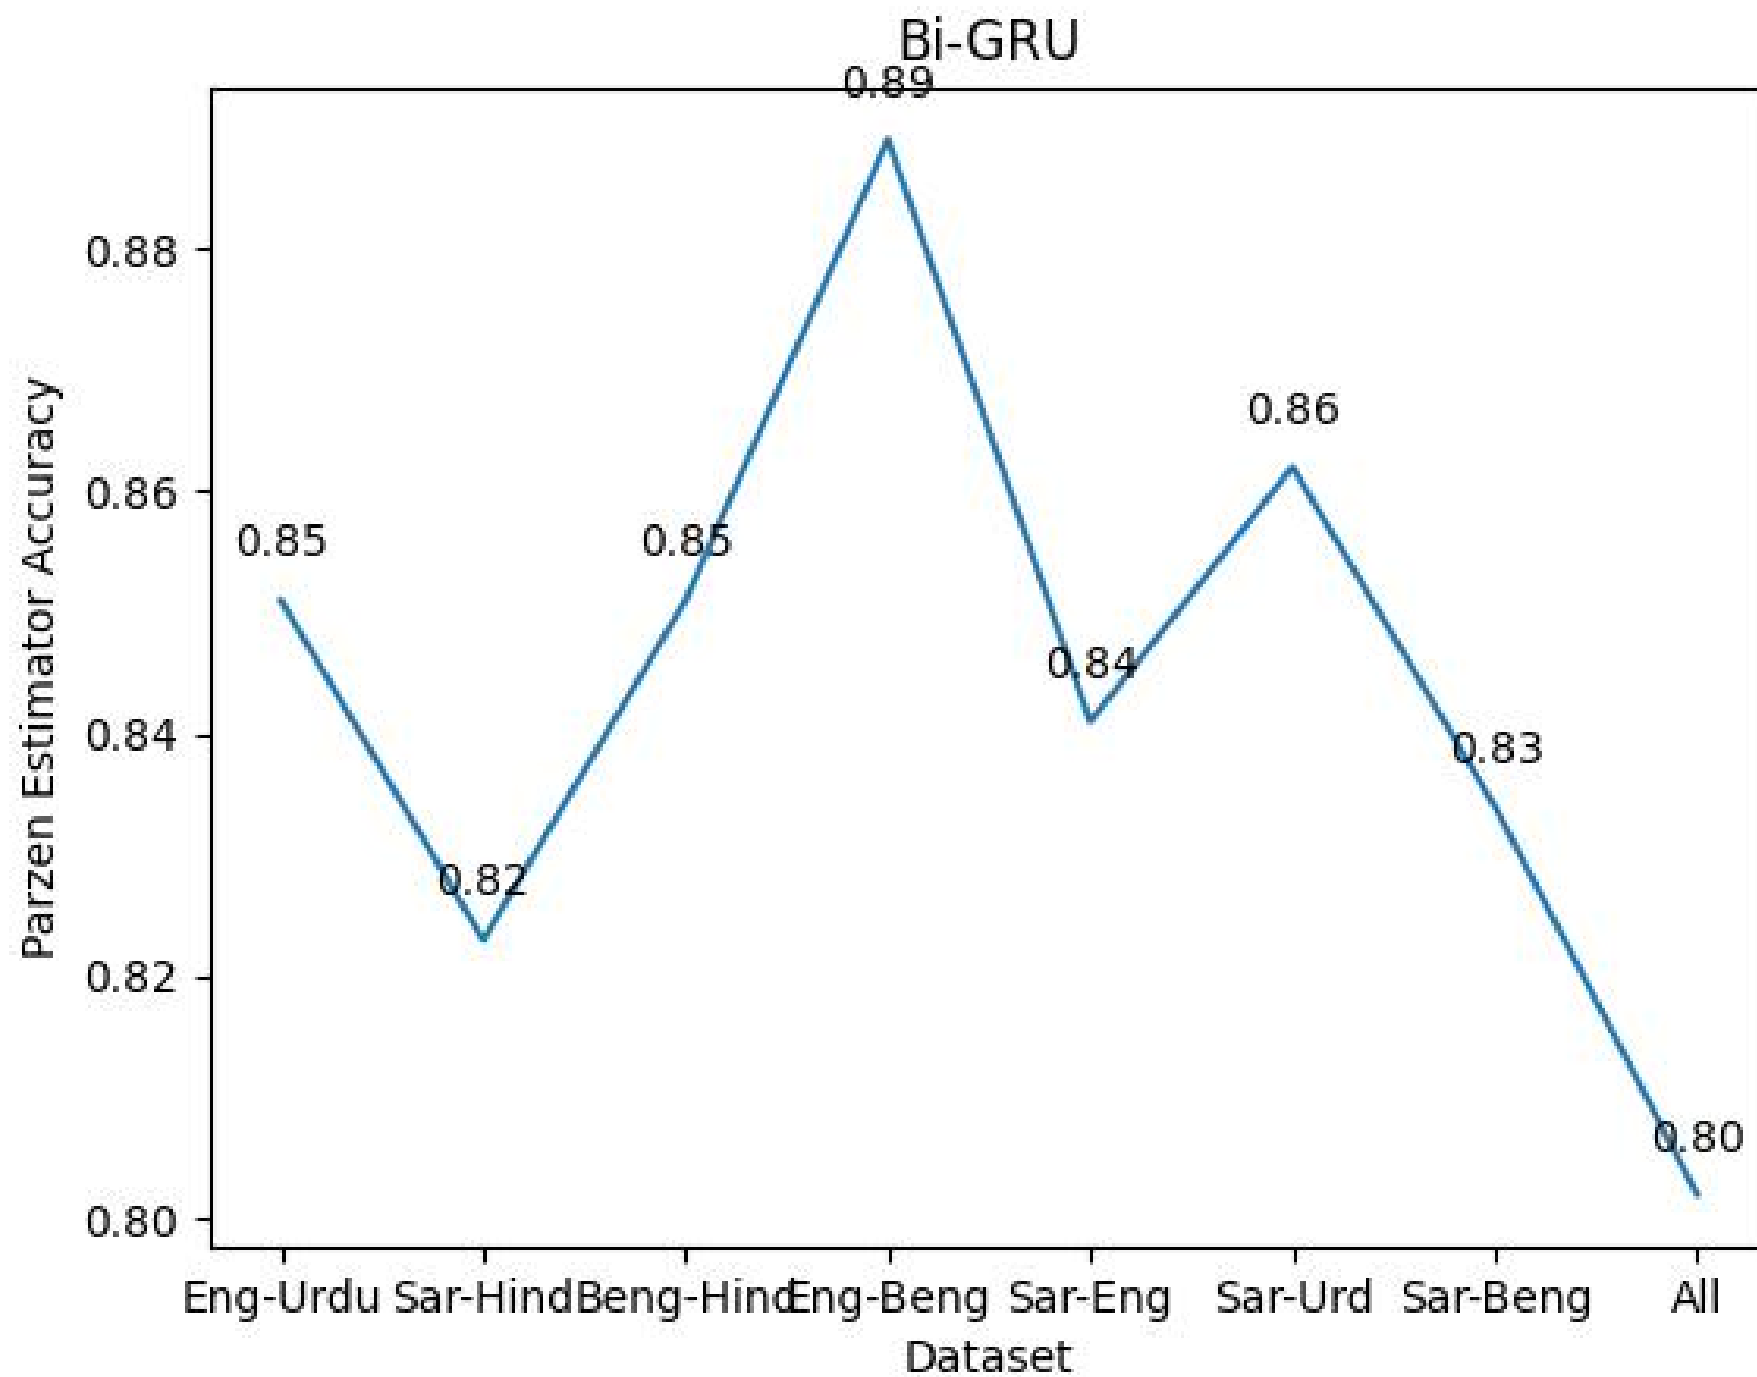

Supplement: f1 [file 8415333.f1.zip]

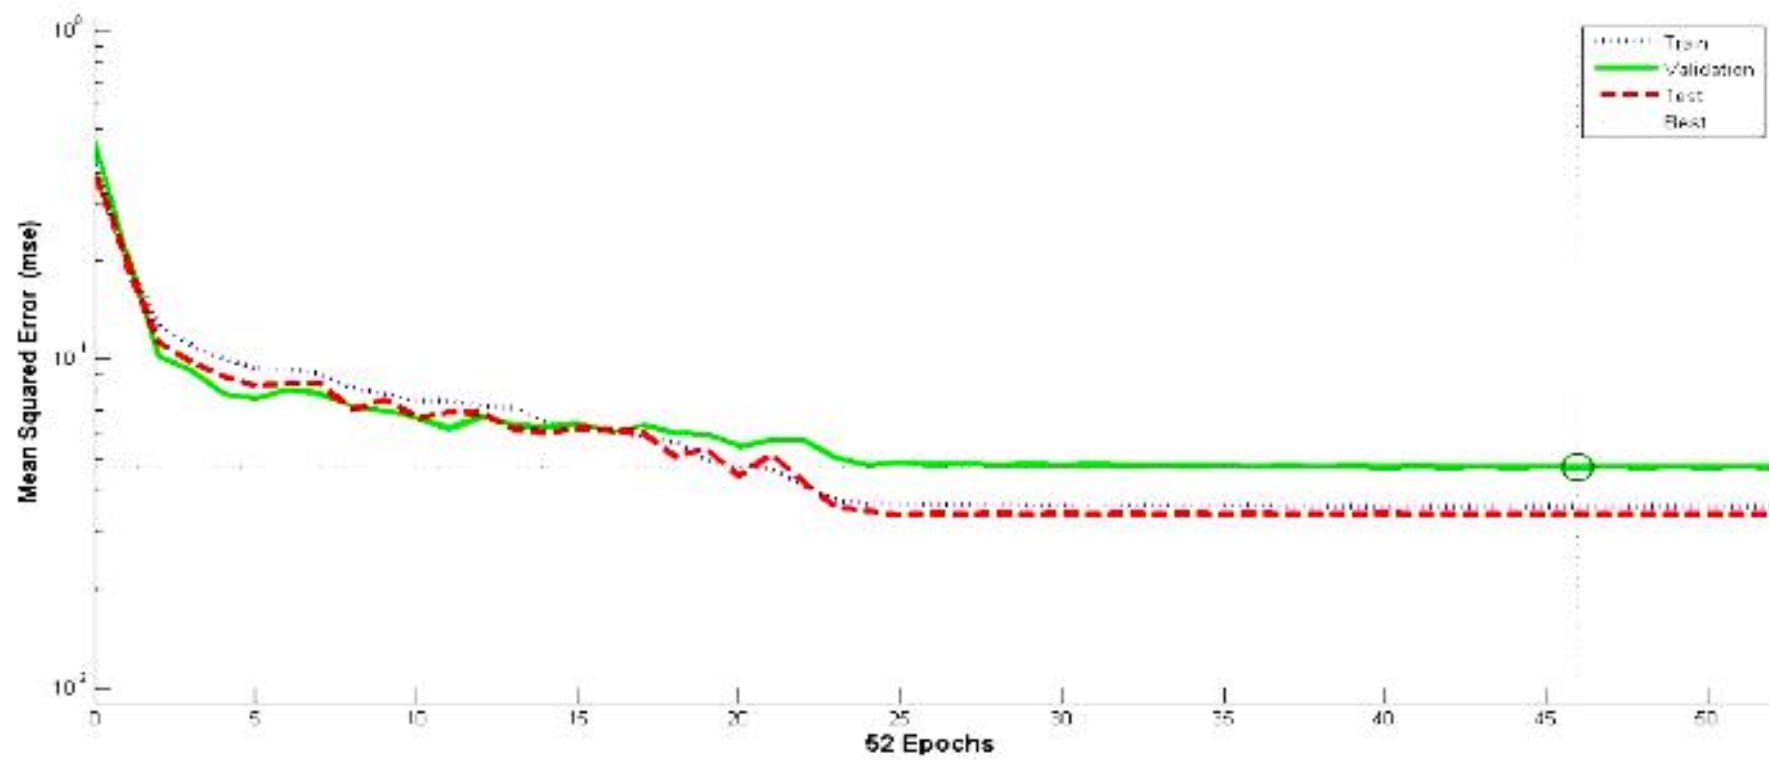

Supplement: f1 [file 8415333.f1.zip]
